# The Complete Genome Sequence of '*Candidatus Liberibacter solanacearum*', the Bacterium Associated with Potato Zebra Chip Disease

Hong Lin<sup>1\*</sup>, Binghai Lou<sup>1,2,3</sup>, Jonathan M. Glynn<sup>1,3</sup>, Harshavardhan Doddapaneni<sup>3,4</sup>, Edwin L. Civerolo<sup>1</sup>, Chuanwu Chen<sup>2</sup>, Yongping Duan<sup>4</sup>, Lijuan Zhou<sup>5</sup>, Cheryl M. Vahling<sup>4</sup>

**1** United States Department of Agriculture-Agricultural Research Service, CDPG, San Joaquin Valley Agricultural Sciences Center, Parlier, California, United States of America, **2** Guangxi Citrus Research Institute, Guilin, Guangxi, People's Republic of China, **3** Carver Center for Genomics, Department of Biology, University of Iowa, Iowa City, Iowa, United States of America, **4** United States Department of Agriculture-Agricultural Research Service, USHRL, Fort Pierce, Florida, United States of America, **5** Department of Plant Pathology, University of Florida, Gainesville, Florida, United States of America

## Abstract

Zebra Chip (ZC) is an emerging plant disease that causes aboveground decline of potato shoots and generally results in unusable tubers. This disease has led to multi-million dollar losses for growers in the central and western United States over the past decade and impacts the livelihood of potato farmers in Mexico and New Zealand. ZC is associated with '*Candidatus Liberibacter solanacearum*', a fastidious alpha-proteobacterium that is transmitted by a phloem-feeding psyllid vector, *Bactericera cockerelli* Sulc. Research on this disease has been hampered by a lack of robust culture methods and paucity of genome sequence information for '*Ca. L. solanacearum*'. Here we present the sequence of the 1.26 Mbp metagenome of '*Ca. L. solanacearum*', based on DNA isolated from potato psyllids. The coding inventory of the '*Ca. L. solanacearum*' genome was analyzed and compared to related *Rhizobiaceae* to better understand '*Ca. L. solanacearum*' physiology and identify potential targets to develop improved treatment strategies. This analysis revealed a number of unique transporters and pathways, all potentially contributing to ZC pathogenesis. Some of these factors may have been acquired through horizontal gene transfer. Taxonomically, '*Ca. L. solanacearum*' is related to '*Ca. L. asiaticus*', a suspected causative agent of citrus Huanglongbing, yet many genome rearrangements and several gene gains/losses are evident when comparing these two *Liberibacter* species. Relative to '*Ca. L. asiaticus*', '*Ca. L. solanacearum*' probably has reduced capacity for nucleic acid modification, increased amino acid and vitamin biosynthesis functionalities, and gained a high-affinity iron transport system characteristic of several pathogenic microbes.

**Citation:** Lin H, Lou B, Glynn JM, Doddapaneni H, Civerolo EL, et al. (2011) The Complete Genome Sequence of '*Candidatus Liberibacter solanacearum*', the Bacterium Associated with Potato Zebra Chip Disease. PLoS ONE 6(4): e19135. doi:10.1371/journal.pone.0019135

**Editor:** Ching-Hong Yang, University of Wisconsin-Milwaukee, United States of America

**Received:** December 11, 2010; **Accepted:** March 17, 2011; **Published:** April 28, 2011

This is an open-access article, free of all copyright, and may be freely reproduced, distributed, transmitted, modified, built upon, or otherwise used by anyone for any lawful purpose. The work is made available under the Creative Commons CC0 public domain dedication.

**Funding:** Funding for this research was provided by the United States Department of Agriculture, Agricultural Research Service. The funders had no role in study design, data collection and analysis, decision to publish, or preparation of the manuscript.

**Competing Interests:** The authors have declared that no competing interests exist.

\* E-mail: hong.lin@ars.usda.gov

These authors contributed equally to this work.

## Introduction

Zebra chip (ZC) is an economically important disease of potato (*Solanum tuberosum*). The disease has been reported since the early 1990s in Central America and Mexico, and was found in the United States in 2000. The disease reduces the marketability of potatoes because it causes discoloration of the medullary rays in raw tubers and intensely dark discoloration when tubers are processed into chips. Tubers from ZC-affected plants also have poor germination rates [1]. The etiology of ZC has not been conclusively determined, although the disease is identified to be associated with a fastidious alpha-proteobacterium named "*Candidatus Liberibacter solanacearum*" [2]. The disease is also associated with the potato psyllid, *Bactericera cockerelli*, which harbors '*Ca. L. solanacearum*' as part of its gut microflora and is thought to transmit the pathogen while feeding on host phloem sap [3]. '*Ca. L. solanacearum*' is also associated with diseases of other solanaceous crops in New Zealand [2] and carrot yellows in Finland [4].

'*Ca. L. solanacearum*' is not the only *Liberibacter* species associated with plant diseases. Three other phylogenetically-distinct [5] species of *Liberibacter* are associated with citrus Huanglongbing (HLB) [6]. The genome of one of these, "*Candidatus Liberibacter asiaticus*", has been sequenced and annotated [7]. Because the *Liberibacter* species associated with ZC and HLB are unculturable, detailed information regarding their etiology, general physiology, and mode of pathogenesis is lacking. To gain further insights into the biology of this genus of bacteria and determine how they contribute to plant decline, we aimed to obtain the complete genome sequence of '*Ca. L. solanacearum*' using metagenomics. Here we present the complete genome sequence of '*Ca. L. solanacearum*', identifying several chromosomal features and making predictions about its physiology based on its gene inventory. In addition, we performed comparative analysis between '*Ca. L. solanacearum*' and '*Ca. L. asiaticus*' to better understand how these microbes cause diseases in plants. The results provide genomic data supporting a high

degree of similarity between ZC-associated '*Ca. L. solanacearum*' and HLB-associated '*Ca. L. asiaticus*', congruent on their similar lifestyles as phloem-colonizing psyllid-vectored bacteria [2,3,7,8,9]. However, we found several significant differences between these closely-related species with regard to their genome organization, biosynthetic capacity for vitamins and amino acids, potential for nucleic acid modification and restriction, and nutrient uptake systems. These unique attributes are likely related to their lifestyle and host range. The data presented here offer critical insights into the physiology of the '*Ca. L.*' species that could facilitate development of novel treatment strategies for both ZC and HLB.

## Results and Discussion

### '*Candidatus Liberibacter solanacearum*' sequence generation and assembly

Two rounds of 454 pyrosequencing were carried out to obtain the complete '*Ca. L. solanacearum*' genome sequence (GenBank accession # CP002371). The initial round of sequencing was done using the FLX standard pyrosequencing method [10]. This run generated a total of 176,935 reads yielding 36,831,668 base pairs (bp) with an average read length of 208 bp. These reads underwent *de novo* assembly into 15,061 contigs covering 5,535,163 bp with contig lengths ranging from 500–55,601 bp. From this dataset, 134 contigs were identified based on homology searches and subsequently confirmed to be valid '*Ca. L. solanacearum*' sequences by PCR. The second round of

sequencing was conducted by Titanium pyrosequencing [10]. This run generated 513,784 reads with a total of 208,868,707 base pairs with average read length of 406 bp. The total sequencing reads from the second round of sequencing were then used for *de novo* assembly, generating 18,147 contigs covering 9,768,772 bp. Of these, 27 contigs ranging from 1,000–279,292 bp were identified as homologous to known *Liberibacter* genomic DNA sequences, and these were subsequently confirmed by PCR. Together, both rounds of DNA sequencing generated a composite sequence dataset with at least 30 fold coverage of the '*Ca. L. solanacearum*' genome.

To confirm and connect '*Ca. L. solanacearum*' contigs, 350 primer pairs were designed and used for conventional and long distance PCR (Table S1). Using method we developed, 136 primers were designed for genomic walking [11] (Table S2). Amplicons generated from these primers were directly sequenced or cloned prior to sequencing. In total, we resequenced over 200,000 bp by Sanger sequencing. These efforts led to the successful closure of all gaps in the genome sequence and resulted in assembly of a circular chromosome consisting of 1,258,278 bp (Figure 1).

### General features of the '*Candidatus Liberibacter solanacearum*' genome and comparison to '*Ca. L. asiaticus*'

The '*Ca. L. solanacearum*' genome has 35.24% G+C content (Table 1), which is considerably lower than the ~60% G+C content observed for most other genomes of the *Rhizobiaceae*

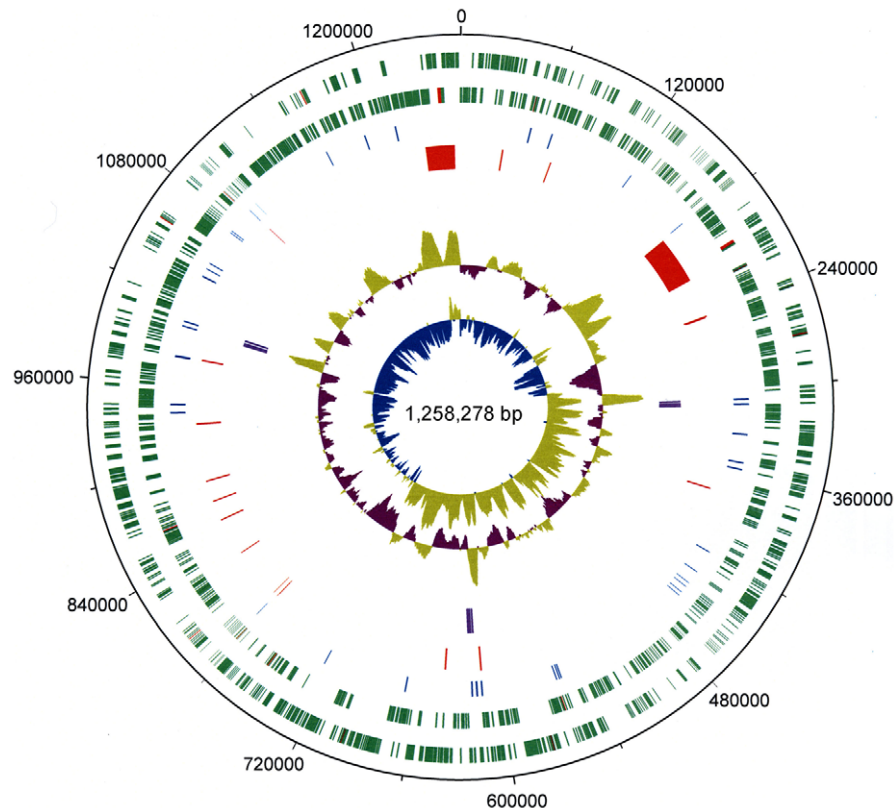

**Figure 1. Schematic representation of the '*Candidatus Liberibacter solanacearum*' genome.** Circular representation of the 1.26 Mbp genome. The tracks from the outmost circles represent (1) Forward CDS (green) and (2) Reverse CDS (green) with pseudogenes in red; (3) tRNA (blue); (4) bacteriophage derived regions and probable phage remnants (red); (5) three copies of rRNA operon (16S, 23S and 5S) (purple); (6) G+C content and (7) GC skew [(GC)/(G+C)].

doi:10.1371/journal.pone.0019135.g001

**Table 1.** General features of the '*Candidatus Liberibacter solanacearum*' genome.

| Feature                                  | Value     |
|------------------------------------------|-----------|
| Size (bp)                                | 1,258,278 |
| G+C Content                              | 35.24%    |
| CDS (Protein-coding genes)               | 1,192     |
| Hypothetical Proteins                    | 405       |
| tRNA genes                               | 45        |
| rRNA Operons                             | 3         |
| Putative pseudogenes (frameshifted ORFs) | 35        |

doi:10.1371/journal.pone.0019135.t001

[12,13,14], but similar to the G+C content of the '*Ca. L. asiaticus*' genome (36.48%) [7]. The 1.26 Mbp '*Ca. L. solanacearum*' chromosome encodes 1,192 putative proteins (CDS); 848 of these can be assigned to a Cluster of Orthologous Groups (COG) and approximately 35% of the total coding sequences encode hypothetical proteins (Table 1). We also identified 3 complete rRNA operons (16S, 23S, and 5S), 45 genes encoding tRNAs, and at least 35 probable pseudogenes within the '*Ca. L. solanacearum*' genome (Table 1). Although the genome size and number of genes encoded by '*Ca. L. solanacearum*' are smaller than most members of the *Rhizobiaceae* family [12,13,14], these characteristics are consistent with the general features of the '*Ca. L. asiaticus*' genome [7]. A pairwise comparison of the '*Ca. L. solanacearum*' and '*Ca. L. asiaticus*' genomes revealed 884 protein-coding sequences common to both organisms (Figure 2 and Table S3). Notably, 236 sequences from '*Ca. L. solanacearum*' have no corresponding ortholog in '*Ca. L. asiaticus*' and nearly 90% of these unique sequences encode hypothetical proteins (Figure 2 and Table S4). Conversely, 186 sequences from '*Ca. L. asiaticus*' have no corresponding ortholog in '*Ca. L. solanacearum*' and approximately 95% of these encode hypothetical proteins (Figure 2 and Table S4). Because both '*Ca. L. solanacearum*' and '*Ca. L. asiaticus*' encode for a large number of membrane transporters, we also compared the general transporter capabilities of the two bacteria. Based on our analysis, '*Ca. L. solanacearum*' harbors only 8 additional proteins involved in transport (Table S5). Other genes that show similarity to previously characterized proteins imperative for proper cell function are also discussed below.

### Organization of the '*Candidatus Liberibacter solanacearum*' genome and identification of prophage-like regions

While '*Ca. L. solanacearum*' and '*Ca. L. asiaticus*' are phylogenetically related based on 16S rRNA comparisons [2,3,5,15], the organization of these two genomes is different. Alignment of the two genomes suggests several recombination events have occurred since the divergence of these two species from a common ancestor (Figure 3). The identification of two highly-similar ~40 kb segments within the '*Ca. L. solanacearum*' genome that appear to be phage-derived suggest that phage integration events may be playing a key role in the rearrangement of the *Liberibacter* genomes (Figure 3 and Figure S1). The first segment, Prophage I (P-I) located from base pair 176,396 to 217,189 in the '*Ca. L. solanacearum*' genome while the second segment, Prophage II (P-II), extends from base pair 1,214,970–1,258,278 (Figure 3). Alignment analysis revealed that P-I had a high degree of similarity with one of the '*Ca. L. asiaticus*' phage

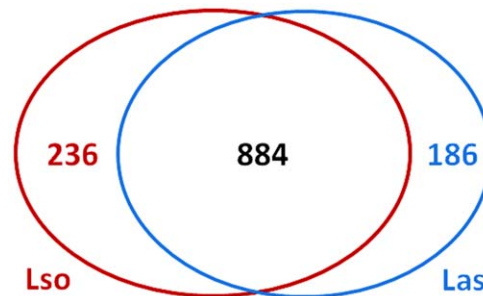

**Figure 2.** Comparison of the '*Candidatus Liberibacter solanacearum*' and '*Candidatus Liberibacter asiaticus*' predicted proteomes. '*Ca. L. solanacearum*'-encoded sequences are delimited by the red line and '*Ca. L. asiaticus*'-encoded sequences are delimited by the blue line. 884 bidirectional best hits (BBH) were identified in both genomes using an e-value cutoff of  $10^{-15}$ . The remaining sequences consist of both unidirectional hits and unique sequences. Using the above cutoff values, 236 BBH '*Ca. L. solanacearum*' sequences are considered unique to '*Ca. L. solanacearum*' and 186 BBH '*Ca. L. asiaticus*' sequences are considered unique to '*Ca. L. asiaticus*'. Most of the species-specific predicted translations are annotated as hypothetical proteins.

doi:10.1371/journal.pone.0019135.g002

sequences whereas the P-II sequence only contained a small segment with a lower degree of similarity to the '*Ca. L. asiaticus*' phage sequences. Several lines of evidence exist supporting the hypothesis that these regions were derived from phage genome including both P-I and P-II consist of DNA sequences with a G+C content of 39.86% and 40.02%, respectively, which differs from the 35.24% G+C content of the core genome. In addition, phage-derived genes including a phage-related lysozyme, head-to-tail joining protein, phage terminase, prophage antirepressor, anti-repressor protein P4 family phage/plasmid primase, and an integrase family protein were identified in both prophage segments. The prophage genes within P-I and P-II do not exhibit colinear arrangement, but are instead mosaics with several hypothetical coding sequences arranged amongst them, suggesting that they are possibly derived from two different prophage integration events (Figure S1). It is unclear if the two phage integration events preceded speciation of '*Ca. L. solanacearum*' and '*Ca. L. asiaticus*' (Figure 3). In addition to the two prophage-like genome sequences, there are a number of prophage-like elements and phage remnants dispersed throughout genome that are presumed to be derived from multiple ancestral bacteriophage integration events (Figure 1 and Figure 3), thus suggesting an involvement of phage integration during gene rearrangement in *Liberibacter*.

### Carbohydrate uptake, metabolism, and energy metabolism

To gain a better understanding of '*Ca. L. solanacearum*' biology, we used the predicted gene inventory of '*Ca. L. solanacearum*' to generate hypotheses about its metabolism and possible lifestyle. As shown in Figure 4, '*Ca. L. solanacearum*' lacks an obvious phosphotransferase system (PTS) [16] for transporting sugars across the inner membrane, but does encode a single glucose/galactose transporter related to the fucose permease family (COG0738) of sugar transporters [17,18]. Since '*Ca. L. solanacearum*' colonizes phloem tissue of the potato plant it presumably has access to copious amounts of sucrose, fructose, and glucose [19,20]. However, none of the sequences in its gene repertoire suggests that it is capable of transporting sucrose or

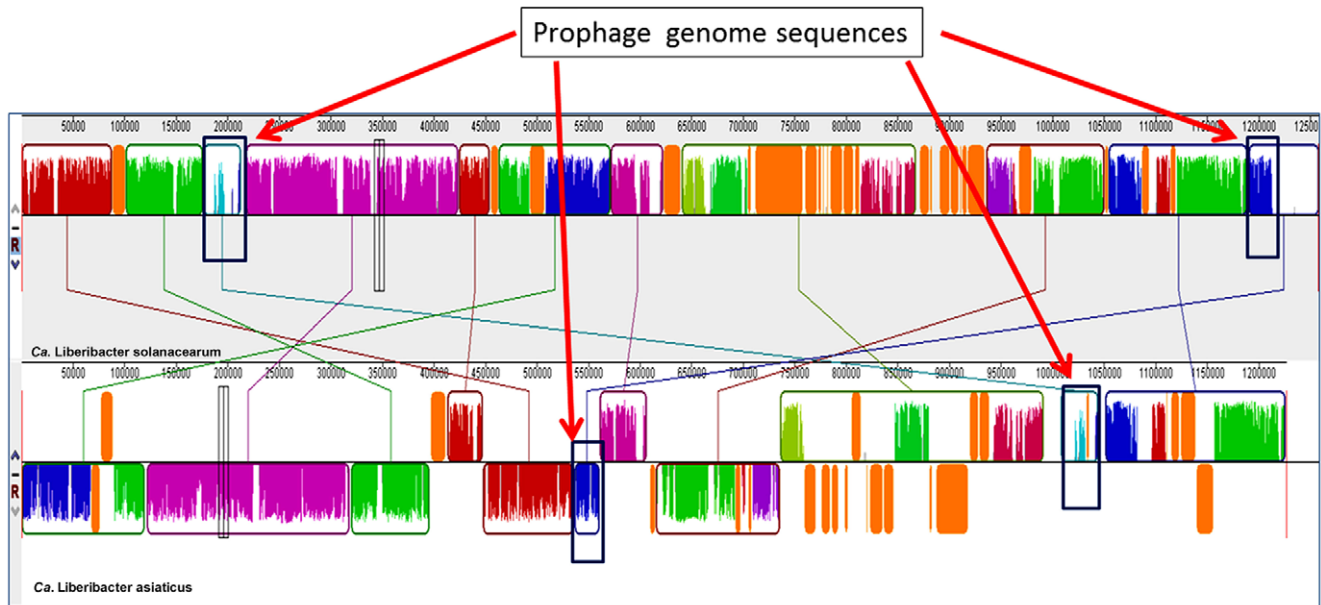

**Figure 3. Comparison of the 'Candidatus Liberibacter asiaticus' and 'Candidatus Liberibacter solanacearum' chromosomal features.** Locally collinear blocks (LCBs) identified in genomes of '*Ca. L. solanacearum*' and '*Ca. L. asiaticus*'. Each contiguously colored region is a LCB, a region without rearrangement of homologous backbone sequence. LCBs below a genome's center line are in the reverse complement orientation relative to the reference genome, '*Ca. L. solanacearum*'. Lines between genomes trace each orthologous LCB through every genome. The '*Ca. L. solanacearum*' and '*Ca. L. asiaticus*' genomes have undergone considerable genome rearrangements. Two rectangles represent bacteriophage-derived regions in '*Ca. L. solanacearum*' which was matched with '*Ca. L. asiaticus*'.  
doi:10.1371/journal.pone.0019135.g003

fructose across its cell membrane, leading us to hypothesize that glucose is a major form of reduced carbon utilized by '*Ca. L. solanacearum*'. Intriguingly, this transporter family is also found in '*Ca. L. asiaticus*' and some *Agrobacterium* species, but is missing from other completely-sequenced *Rhizobiaceae*, suggesting that this transporter may have been lost from some lineages and retained by certain *Agrobacterium* and *Liberibacter* species.

The '*Ca. L. solanacearum*' genome also encodes a DctA-family dicarboxylate transporter (COG1301) (Figure 4); DctA family members courier a wide range of substrates, including succinate, fumarate, oxaloacetate, and malate [21,22]. Given that these four compounds, particularly malate, can serve as a primary carbon source to support respiration in root nodule bacteroids [23], it is possible that '*Ca. L. solanacearum*' may also utilize malate as a carbon source when colonizing potato plants, in addition to glucose (above).

'*Ca. L. solanacearum*' encodes all the enzymes of the glycolytic pathway, except for glucose-6-phosphate isomerase (EC 5.3.1.9), but could theoretically bypass the early conversions in glycolysis to generate glyceraldehyde-3-phosphate through a partially-complete pentose phosphate pathway (PPP), allowing '*Ca. L. solanacearum*' to produce pyruvate from imported glucose. The '*Ca. L. solanacearum*' genome also encodes all the enzymes required to convert pyruvate to acetyl-CoA, which is required for fatty acid metabolism and entry into the TCA cycle. Moreover, '*Ca. L. solanacearum*' possesses all eight subunits needed for functional ATP synthesis (Figure 4), indicating that it can synthesize ATP from ADP and inorganic phosphate similar to other bacteria including '*Ca. L. asiaticus*' (Figure 4) [7]. Not surprisingly, the oxidative phosphorylation pathway of '*Ca. L. solanacearum*' varies only slightly from '*Ca. L. asiaticus*': the HLB bacterium encodes an NADH dehydrogenase (EC 1.6.99.3) which is absent from '*Ca. L. solanacearum*'. All other aspects of the oxidative phosphorylation pathways of the two organisms are the same, including previously

noted absences of polyphosphate kinase (EC 2.7.4.1), inorganic diphosphatase (EC 3.6.1.1), a *cbb3*-type cytochrome *c* oxidase, and the cytochrome *bd* complex for '*Ca. L. asiaticus*' [7]. In general, these observations lead us to infer that both '*Ca. L. asiaticus*' and '*Ca. L. solanacearum*' seem to have limited capacity for aerobic respiration, consistent with the low-oxygen microenvironments where they are thought to thrive.

As in '*Ca. L. asiaticus*', the '*Ca. L. solanacearum*' genome encodes an ATP/ADP transporter of the NttA family (COG3202) (Figure 4). This transport protein was recently shown to facilitate direct uptake of extracellular ATP and ADP by *E. coli* [8], suggesting that both '*Ca. L. asiaticus*' and '*Ca. L. solanacearum*' can directly import ATP/ADP from extracellular sources. Curiously, orthologs of the NttA transporter family are missing from all other *Rhizobiaceae*, suggesting that this transporter may have been acquired early in the evolution of '*Ca. L. asiaticus*' and '*Ca. L. solanacearum*' through horizontal transfer (Figure S2).

### Amino acid transport and metabolism

'*Ca. L. solanacearum*' possesses relatively few of the enzymes required for *de novo* synthesis of amino acids and/or their interconversion (Figure 4). This limited repertoire of biosynthetic genes related to amino acid biosynthesis is consistent with the complement of transporter systems found in '*Ca. L. solanacearum*', as this bacterium encodes at least three complete transporter systems with a cumulative broad range amino acid transport capability: a general L-amino acid ABC transporter system (COG4597, COG0765, COG1126, and COG0834); a proline/glycine-betaine ABC transporter system (COG2113, COG4176, and COG4175); and a DctA-family dicarboxylate (aspartate) transporter (COG1301). Using BLAST analyses, we found that close relatives of all these transporter components occur within the *Rhizobiaceae*, making vertical inheritance a likely source for these putative transporter systems.



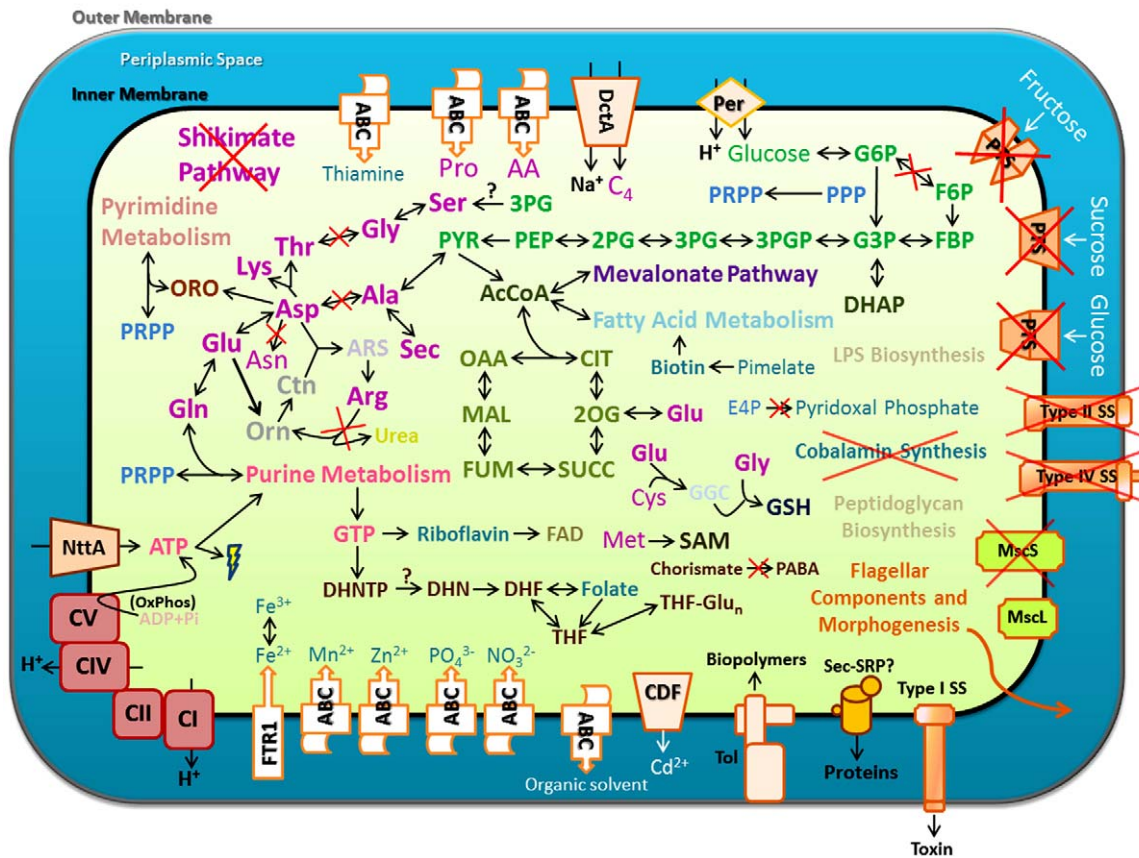

**Figure 4. Predicted ‘*Candidatus Liberibacter solanacearum*’ metabolic pathways and general features.** Schematic representation of an ‘*Ca. L. solanacearum*’ cell bounded by inner and outer membranes. Cofactors (aqua) and amino acids (violet) that are predicted to be synthesized by ‘*Ca. L. solanacearum*’ are indicated by dark bold text; exogenously-supplied vitamins and amino acids are indicated in faint text. Ions, amino acids, and nucleotides are indicated by common abbreviations. Glucose-6-phosphate (G6P); fructose-6-phosphate (F6P); fructose biphosphate (FBP); glyceraldehyde-3-phosphate (G3P); 1,3-bisphosphoglycerate (3PGP); 3-phosphoglycerate (3PG); 2-phosphoglycerate (2PG); phosphoenolpyruvate (PEP); pyruvate (PYR); orotate (ORO); 5-phosphoribosyl diphosphate (PRPP); ornithine (Orn); citrulline (Ctn); arginosuccinate (ARS); acetyl-CoA (AcCoA); dihydroxyacetone phosphate (DHAP); oxaloacetate (OAA); citrate (CIT); 2-oxoglutarate (2OG); succinate (SUCC); fumarate (FUM); malate (MAL); erythrose-4-phosphate (E4P); S-adenosylmethionine (SAM); gamma-glutamylcysteine (GGC); glutathione (GSH); inorganic phosphate (Pi); flavin adenine dinucleotide (FAD); p-aminobenzoic acid (PABA); dihydroneopterin triphosphate (DHNTp); dihydroneopterin (DHN); dihydrofolate (DHF); tetrahydrofolate (THF); polyglutamylated tetrahydrofolate (THF-Glu<sub>n</sub>); dicarboxylate compounds (C4); dicarboxylate transporter (DctA); three-component ABC transporter (ABC); ATP/ADP nucleotide transporter (NttA); glucose permease (Per); phosphotransferase system (PTS); secretion system (SS); cation diffusion facilitator (CDF); high-affinity iron transporter (FTR1); Tol-import pathway (Tol); signal recognition particle secretion pathway (Sec-SRP); complex I (CI); complex II (CII); complex IV (CIV); complex V (CV); small-conductance mechanosensitive ion channel (MscS); large-conductance mechanosensitive ion channel (MscL); oxidative phosphorylation (OxPhos); and pentose phosphate pathway (PPP). doi:10.1371/journal.pone.0019135.g004

Interestingly, comparison of the ‘*Ca. L. solanacearum*’ and ‘*Ca. L. asiaticus*’ genomes revealed one major difference between the two organisms with respect to amino acid metabolism: ‘*Ca. L. solanacearum*’ encodes a full-length N-acetylglutamate kinase (NAGK), while ‘*Ca. L. asiaticus*’ does not [7]. The presence of an NAGK coding sequence in the ‘*Ca. L. solanacearum*’ genome indicates that the ZC bacterium has a complete pathway for the production of arginine from glutamate (Figure 5). The ‘*Ca. L. solanacearum*’ NAGK sequence is highly similar to arginine-sensitive NAGKs and contains all three signatures of an arginine-sensitive NAGK (Figure S3A) [24], indicating that this enzyme probably serves as a point of feedback inhibition for arginine biosynthesis in ‘*Ca. L. solanacearum*’. Phylogenetic analysis of the ‘*Ca. L. solanacearum*’ NAGK sequence places it amongst NAGK sequences of other *Rhizobiaceae* (Figure S3B), indicating this gene was probably inherited vertically from an ancestor of ‘*Ca. L. solanacearum*’. Consistent with this observation, we note that the ‘*Ca. L. asiaticus*’ genome contains a single NAGK-like nucleotide

sequence (located between CLIBASIA\_01845 and CLIBASIA\_01860) that has accumulated several stop codons, suggesting that an ancestor of ‘*Ca. L. asiaticus*’ also encoded a functional NAGK. However, we cannot rule out the possibility of an enzyme with NAGK activity whose sequence is unrelated to the canonical NAGK protein family.

#### Nucleotide metabolism

The ‘*Ca. L. solanacearum*’ genome encodes a suite of proteins involved in nucleotide transport and metabolism. The partial pentose phosphate pathway of ‘*Ca. L. solanacearum*’ could provide a supply of 5-phosphoribosyl diphosphate (PRPP) to feed into purine and pyrimidine synthesis (Figure 4). Like ‘*Ca. L. asiaticus*’, ‘*Ca. L. solanacearum*’ probably synthesizes purine nucleotides exclusively through inosine monophosphate and pyrimidine nucleotides exclusively through uridine monophosphate [7]. While we observed no differences between ‘*Ca. L. asiaticus*’ and ‘*Ca. L. solanacearum*’ with regard to nucleotide

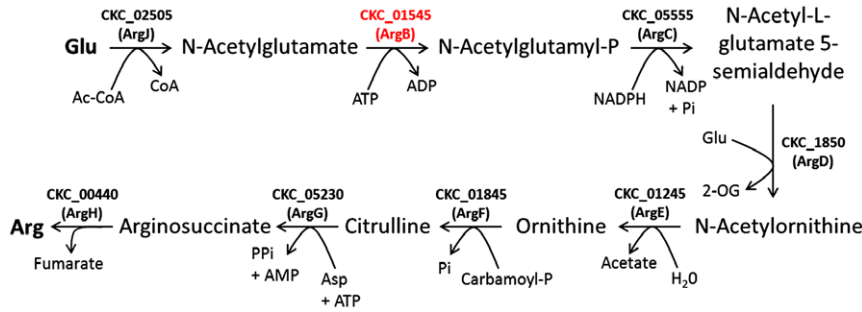

**Figure 5. Analysis of the ‘*Candidatus Liberibacter solanacearum*’ arginine biosynthesis pathway.** The typical prokaryotic arginine biosynthesis pathway. The NAGK family of enzymes (COG0548) catalyze the second step in arginine biosynthesis and are known as ArgB in many bacteria [106,107,108,109]. In general, NAGKs come in two forms: hexameric arginine-sensitive enzymes and dimeric arginine-insensitive enzymes. The arginine-sensitive varieties of these enzymes typically function as a critical point of feedback inhibition for arginine biosynthesis [24,110,111]. doi:10.1371/journal.pone.0019135.g005

metabolism, both of these species lack several of the alternative routes of nucleotide synthesis found in closely-related members of the *Rhizobiaceae* family [12,25,26], consistent with the highly-specialized lifestyle and reduced genomes of these two disease-associated *Liberibacter* species.

**Vitamin transport and biosynthesis**

In our analysis of the ‘*Ca. L. solanacearum*’ genome, we found only a few genes involved in vitamin uptake. There are no sequences matching complete transporters for riboflavin [27,28], pyridoxal phosphate [29], niacin [30], cobalamin [29,31], biotin [32], or folate [33,34]. This is surprising for a few nutrients, as coding sequences associated with complete biosynthetic pathways for niacin, cobalamin, and pyridoxal phosphate are missing from the ZC-associated bacterium (Figure 4).

While most of the genes involved in thiamine biosynthesis were also absent from the ‘*Ca. L. solanacearum*’ genome, we found all three constituents of a typical prokaryotic thiamine ABC transporter: TbpA (COG4143), ThiP (COG1178), and ThiQ (COG3840) [35]— indicating that ‘*Ca. L. solanacearum*’ derives vitamin B1 exclusively from its environment. The proteins that constitute these transporters in ‘*Ca. L. solanacearum*’ and ‘*Ca. L. asiaticus*’ are more closely related to those of known pathogenic bacteria than to those of the *Rhizobiaceae* (Figure S4).

In contrast to ‘*Ca. L. asiaticus*’, ‘*Ca. L. solanacearum*’ seems to have a nearly-complete vitamin B9 biosynthesis pathway (Figure 6) capable of performing folate biosynthesis from GTP based on its gene repertoire. ‘*Ca. L. asiaticus*’ lacks *FolB*, *FolK*, and *FolP*-like sequences [7] and probably relies on folate from extracellular

sources; these three loci are likely to have originated from a *Rhizobium*-like ancestor (Figure S5). Like many folate-synthesizing bacteria, ‘*Ca. L. solanacearum*’ lacks a *FolQ*-like pyrophosphatase required to convert 7,8-Dihydroneopterin 3'-triphosphate to dihydroneopterin monophosphate and is also devoid of a PTPS-III bypass enzyme present in select bacteria and protozoans [36,37]. However, coding sequences for distant relatives of the Nudix-family enzyme involved in this reaction [38] are present in ‘*Ca. L. solanacearum*’ and may provide the pyrophosphatase activity required for the “missing” part of this pathway [37,39], but we note that neither locus is clustered with *FolP* or *FolC*-like sequences as in some other prokaryotes [40].

**Ion transport and assimilation**

Our survey of the ion transporters encoded by the ‘*Ca. L. solanacearum*’ genome revealed multicomponent ABC transporters for phosphate, nitrate, zinc, and manganese (Figure 4). In addition, ‘*Ca. L. solanacearum*’ has also acquired a gene cluster (Figure 7) involved in iron transport and assimilation (*ITA*) that is not present in ‘*Ca. L. asiaticus*’ or any other member of the *Rhizobiaceae*, but is found in several pathogenic genera. The ‘*Ca. L. solanacearum*’ *ITA* gene cluster contains five genes: two predicted periplasmic proteins (CKC\_01650 and CKC\_01655), an FTR1-like iron permease (CKC\_01660), a predicted periplasmic lipoprotein (CKC\_01665), and a heme-binding peroxidase (CKC\_01670) (Figure 7). The core component of this cluster is *FTR1* (Figure 7); the corresponding ‘*Ca. L. solanacearum*’ protein sequence is closely related to FTR1 sequences from disease-associated *Proteus* and *Providencia* species (Figure S6). Intriguingly,

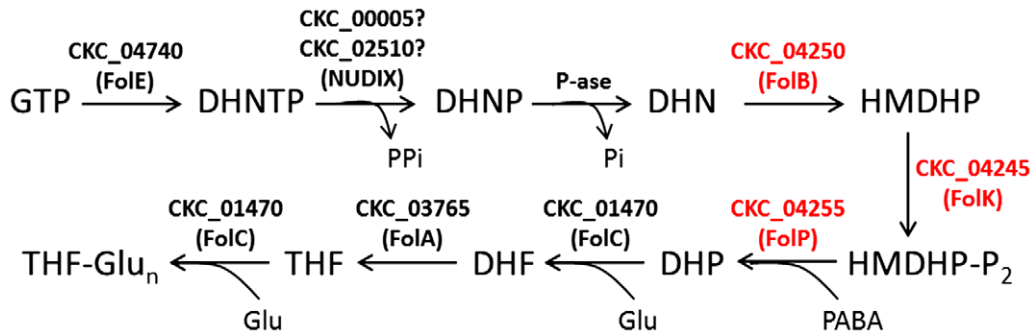

**Figure 6. Analysis of the ‘*Candidatus Liberibacter solanacearum*’ folate biosynthetic pathway.** A typical prokaryotic folate biosynthetic pathway. Enzymes in red are those encoded by ‘*Ca. L. solanacearum*’ that are not encoded by ‘*Ca. L. asiaticus*’. doi:10.1371/journal.pone.0019135.g006

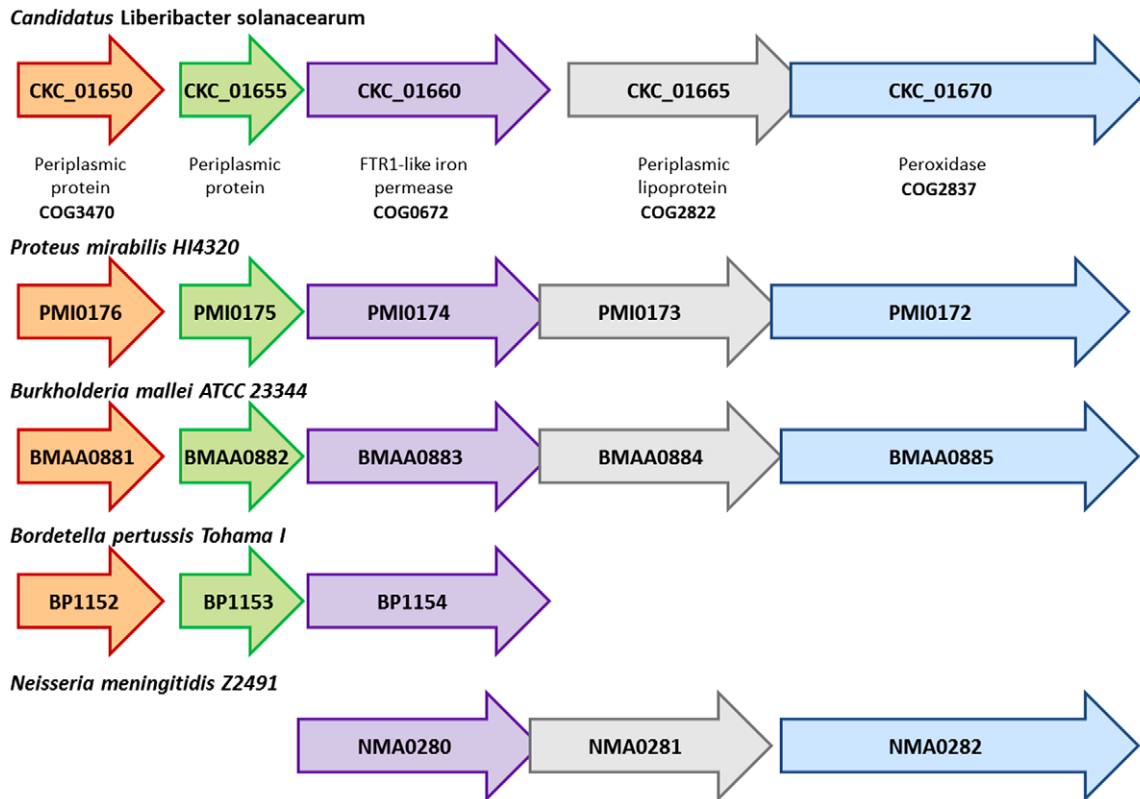

**Figure 7. The iron transport and assimilation (*ITA*) gene cluster.** Structure of the *ITA* gene cluster from several pathogenic microbes. doi:10.1371/journal.pone.0019135.g007

the *ITA* gene cluster is located within a ~20 kb interval (332644–352525) that contains ~17 ORFs flanked by two tRNA genes. This interval has a G+C content that is slightly lower (33.77%) than the collective '*Ca. L. solanacearum*' genome (35.07%), but it is unclear if this region is part of a horizontally-acquired genomic island. FTR1-like high-affinity iron transporters have been associated with virulence in several cases and their expression is generally induced in response to iron limitation [41,42,43]. As such, it is possible that the *ITA* gene cluster may play a role in causing disease symptoms that resemble iron deficiency in '*Ca. L. solanacearum*'-colonized potato plants.

In addition to the high affinity iron transporter, the '*Ca. L. solanacearum*' genome encodes a non-heme ferritin-like protein (CKC\_00675, COG1528) [44,45]. This ferritin-like protein is also found within the '*Ca. L. asiaticus*' genome [7], but absent from the genomes of all other *Rhizobiaceae*. The ferritin superfamily of proteins includes several diverse members that are typically involved in iron storage and detoxification [46,47,48]. We hypothesize that this ferritin-like protein may play a critical role in the survival and/or virulence of both '*Ca. L. solanacearum*' and '*Ca. L. asiaticus*', similar to other pathogenic organisms [49,50,51,52]. Curiously, the '*Ca. L. solanacearum*' and '*Ca. L. asiaticus*' ferritin-like sequences are much diverged from other ferritin-like sequences (Figure S7), indicating that the *Liberibacter* ferritin-like proteins have a unique origin or that extensive isolation of the *Liberibacter* has led to a novel sequence.

### Sulfur and Nitrogen Assimilation

'*Ca. L. solanacearum*', like '*Ca. L. asiaticus*', appears to be incapable of 3-step sulfate reduction and lacks the enzymes required for incorporation of sulfur-containing inorganic com-

pounds into amino acids [7]. While we do not find any evidence for a 3-step sulfate reduction pathway based on the gene prediction, we cannot rule out sulfate reduction through a non-canonical enzymatic process or the use of an alternative terminal electron acceptor under anaerobic conditions.

With regard to nitrogen metabolism, '*Ca. L. solanacearum*' and '*Ca. L. asiaticus*' appear able to incorporate ammonia into glutamine (COG0174), but unlike their nitrogen-fixing relatives both these *Liberibacter* species have lost the ability to convert nitrogen (N<sub>2</sub>) to ammonia [53,54]. Strangely, only '*Ca. L. solanacearum*' has retained an ortholog of *Rhizobium sp.* NtrX, a two-component response regulator that has been shown to modulate expression of genes involved in nitrogen fixation [55,56,57]. The function of NtrX in the absence of NtrY and *NifA* is unclear, but perhaps NtrX has developed a novel sensor or regulatory function in the lifecycle of the ZC bacterium.

### Cell cycle, growth, and division

The '*Ca. L. solanacearum*' genome encodes orthologs of CtrA, GcrA, and DnaA. These proteins are key regulators of the bacterial cell cycle [58] and may be targets for small-molecule inhibitors aimed at perturbing growth and/or replication of '*Ca. L. solanacearum*'. In addition to cell cycle factors, bacterial cell wall synthesis machinery may also be a target for treatment of ZC, based on the efficacy of beta-lactams like penicillin on '*Ca. L. asiaticus*' [59] and considering that the '*Ca. L. asiaticus*' and '*Ca. L. solanacearum*' genomes encode a similar suite of factors involved in peptidoglycan synthesis [60,61,62]. Curiously, both '*Ca. L. solanacearum*' and '*Ca. L. asiaticus*' possess only the elongated non-canonical FtsZ (FtsZ2) [63] sequence and lack the shorter FtsZ (FtsZ1) coding sequence found in several members of the

*Rhizobiaceae* family [64]. Moreover, only a portion of the genes involved in cell division have been retained in these two *Liberibacter* species: the *minCDE* gene cluster that helps determine division site placement in bacteria, including the *Rhizobiaceae* [65,66], has apparently been lost from the *Liberibacter* lineage. The significance of these gene losses from '*Ca. L. solanacearum*' and '*Ca. L. asiaticus*' is not yet clear.

### DNA replication and repair

Most general bacterial pathways for DNA replication and repair are encoded by the '*Ca. L. solanacearum*' and '*Ca. L. asiaticus*' genomes. However, the '*Ca. L. solanacearum*' genome encodes three known proteins involved in DNA replication and repair that are absent from '*Ca. L. asiaticus*': LexA, DnaE, and RadC. LexA repressors (COG1974) are cleaved in response to UV exposure to activate the bacterial SOS response regulon, which triggers the activity of cellular DNA repair machinery and elicits prophage induction [67,68]. An ortholog of DnaE (COG0587) is also encoded in the '*Ca. L. solanacearum*' genome. DnaE proteins are involved in lagging strand synthesis in several organisms with low G+C genome content [69]. The expression of this type of polymerase is typically induced as part of the SOS response to facilitate translesion DNA synthesis and typically have high error rates [69,70]. A RadC ortholog (COG2003) is also encoded in the '*Ca. L. solanacearum*' genome. While not associated with the SOS regulon, its activity is enhanced in response to UV-induced DNA damage [71]. The function of RadC is still unclear, but it is thought to be involved in the repair of DNA strand breaks [71,72]. We also noted that the RecN DNA repair protein (COG0497) is not encoded by the '*Ca. L. solanacearum*' genome, but is found in the '*Ca. L. asiaticus*' genome [7]. This protein is thought to be involved in the repair of double strand breaks in some bacteria [73,74].

### Nucleic acid restriction and modification

In our comparison of the '*Ca. L. solanacearum*' and '*Ca. L. asiaticus*' genomes, we identified very few genes of known function (i.e. non-hypothetical) that were unique to the HLB-associated bacterium. Previous work showed that the '*Ca. L. asiaticus*' genome possesses loci encoding complete Type I and Type II restriction-modification systems [7]. The '*Ca. L. solanacearum*' genome encodes a Type I DNA methylase, but lacks any genes coding for restriction enzymes. In general, bacterial DNA restriction-modification systems are thought to be a common defense mechanism against invading phage [75,76]. These observations are consistent with the presence of at least two large putative phage-integration sites in the '*Ca. L. solanacearum*' genome (Figure 1, Figure 3, and Figure S1).

With further regard to nucleic acid modification, ZC-associated '*Ca. L. solanacearum*' does not encode an ortholog of the tRNA modification enzyme, TrmA. Nearly all organisms, including '*Ca. L. asiaticus*', encode a TrmA-like enzymatic function (EC 2.1.1.35) responsible for the conversion of uridine-54 to ribothymidine during post-transcriptional modification of all tRNAs [77,78]. TrmA activity is essential for viability in *E. coli* [78] and implicated in stress tolerance in some gram-positive bacteria [79]. The reason for this gene loss from the ZC-associated *Liberibacter* is not known.

### Cell adherence and motility

Like the HLB-associated *Liberibacter*, '*Ca. L. solanacearum*' carries a number of genes involved in the assembly of pili and flagella. Pili are involved in cell adhesion in many pathogenic bacteria [80] and '*Ca. L. solanacearum*' appears to encode several

tight adherence (Tad) family proteins involved in the assembly surface pili [81]. These genes are located in a ~8.3 kb region on the '*Ca. L. solanacearum*' (138907–147186) and '*Ca. L. asiaticus*' chromosomes (537888–546266), respectively, with both genomes exhibiting a similar gene arrangement within the *Tad* locus.

In contrast to pili, bacterial flagella are generally utilized for bacterial locomotion [82]. These structures have not been observed on the surface of '*Ca. L. asiaticus*' *in planta* [83], though the '*Ca. L. asiaticus*' chromosome does encode for most of the ~30 factors generally considered to be required for flagellar assembly [7]. Likewise, '*Ca. L. solanacearum*' encodes a nearly-identical set of ~30 proteins, but preliminary micrographs showing '*Ca. L. solanacearum*' within potato phloem tissue do not clearly resolve flagellar structures [2]. Accordingly, it is not yet known if '*Ca. L. solanacearum*' uses a flagellar apparatus for locomotion inside its host organisms or if the '*Ca. L. solanacearum*' flagellum is assembled only under certain conditions.

### Biomolecular transport pathways associated with virulence

Type I secretion systems (TISSs) are used by many pathogenic bacteria for transport of toxins and other molecules. TISSs are generally composed of a tripartite transporter that forms a contiguous channel through the inner and outer membranes [84,85]. Evidence for all three of these components was identified in the '*Ca. L. solanacearum*' genome: HlyD (COG0845), PrtD (COG4618), and a distant relative of TolC (COG1538) (Figure 4). Consistent with their function in toxin secretion, the genes encoding orthologs of HlyD and PrtD are clustered together with a gene for an RTX toxin (COG2931) in both the '*Ca. L. solanacearum*' and '*Ca. L. asiaticus*' genomes (Figure S8).

The '*Ca. L. solanacearum*' genome encodes a Tol-like biopolymer transport system (Figure 4), similar to '*Ca. L. asiaticus*' [7]. Genes encoding most components of the Sec-SRP [86,87] transport system were also evident within the '*Ca. L. solanacearum*' genome, though the coding sequence for the SecB chaperone was missing [88,89]. There was no evidence of a TAT translocation pathway in '*Ca. L. solanacearum*' [90,91]. Complete Type III and Type IV secretion systems [92,93] were absent from the '*Ca. L. solanacearum*' genome, similar to the '*Ca. L. asiaticus*' genome [7]. This is not surprising for a pathogen whose route-of-entry into its host probably requires direct injection by an insect vector [94,95]. '*Ca. L. solanacearum*' is also devoid of Type II secretion pathways and the extracellular oligosaccharide-degrading enzymes they typically courier, consistent with its occupation of the sugar-rich phloem. Conversely, Type II systems are widely used by pathogenic bacteria like *Ercwinia*, *Ralstonia*, and *Xanthomonas* species [96,97,98] that reside in the plant xylem, where easily-accessible forms of reduced carbon are not readily available.

Our analysis of the complete genome of '*Ca. L. solanacearum*' provides several insights into the physiology of this disease-associated bacterium. More importantly, subsequent comparative analyses with other bacteria revealed key differences between '*Ca. L. solanacearum*' and some of its nearest relatives. We found that, despite having very similar gene content, the organization of the '*Ca. L. solanacearum*' and '*Ca. L. asiaticus*' genomes is quite different (Figure 3), suggesting that several recombination events have helped forge these two genomes since their divergence from a common ancestor. Furthermore, many of these recombination events have likely been mediated by phage infection and integration, based on the presence of several phage-derived gene sequences within both the '*Ca. L. asiaticus*' and '*Ca. L. solanacearum*' genomes (Figure 1, Figure 3, and Figure S1). The absence of genes encoding a complete restriction-modification



(RM) system in the '*Ca. L. solanacearum*' genome may make this bacterium highly susceptible to the effects of phage infection and integration. This hypothesis is supported by the presence of two large phage-derived segments within the '*Ca. L. solanacearum*' genome. Although the absence of an RM system may make '*Ca. L. solanacearum*' vulnerable to the effects of prophage integration, it could also lead to an enhanced rate of genome evolution, with '*Ca. L. solanacearum*' acquiring or losing genes through phage-mediated recombination events [99,100,101]. It will be interesting to investigate if other strains of '*Ca. L. solanacearum*' lack RM systems as well and to what degree horizontal transfer is currently shaping '*Ca. L. solanacearum*' genomes from different ecosystems.

Based on our comparisons here, it is possible that a few genes and gene clusters have been acquired by '*Ca. L. solanacearum*' and '*Ca. L. asiaticus*' through horizontal transmission. The NttA ATP/ADP transporter present in both '*Ca. L. solanacearum*' and '*Ca. L. asiaticus*' is absent from other *Rhizobiaceae*, but is closely related to the NttA transporter of pathogenic *Rickettsia* (Figure S2). The gene clusters involved in the uptake and sequestration of thiamine and iron are closely related to those found in a variety of pathogenic microbes (Figures S4, Figure 7 and Figure S6) and may play a significant role in the pathogenesis of ZC disease. Moreover, both the *ftr1* and *ftrn* loci have a slightly skewed %G+C composition, relative to the core '*Ca. L. solanacearum*' genome. Notably, the FTR1-like sequence identified in these analyses has been associated with varying levels of virulence in other pathogens [102] and may therefore serve as a useful marker for studying populations of '*Ca. L. solanacearum*'. Factors such as the NttA and FTR1 transporters could be implicated in disease development by causing energy depletion and nutrient starvation of the host. Functional analyses of these predicted disease-associated factors will likely provide insights into the host-pathogen interactions that occur in ZC and HLB.

While several of the genes highlighted here may be implicated in the development of plant disease symptoms, several of the genes that vary between '*Ca. L. solanacearum*' and '*Ca. L. asiaticus*' appear to be involved in fundamental metabolic pathways. '*Ca. L. solanacearum*' seems to harbor a greater capacity for biosynthesis of amino acids and vitamins compared to '*Ca. L. asiaticus*' (Figure 5 and Figure 6). We conclude that '*Ca. L. solanacearum*' evolved in host environments where arginine and folate are in limited supply, requiring the ZC bacterium to maintain complete biosynthetic pathways for these compounds. In contrast, '*Ca. L. asiaticus*' has lost the capacity to synthesize arginine and folate from glutamate and GTP, respectively—raising the possibility that structural analogs of folate or arginine may be viable treatment options for HLB.

Due to fastidious nature of *Liberibacter*, the bacterium has not yet been conclusively cultured *in vitro*. Thus, Koch's postulates have not been fulfilled. Despite of these limitations, the metagenomic approach developed in this study led to the successfully sequencing the entire genome of this bacterium. The assembly from two independent 454 sequencing runs produced a ~1.26 Mbp circular chromosome which is consistent with the reports from the related species of '*Ca. L. asiaticus*' [7] and '*Ca. L. americanus*' [103]. However, some caution should be used as this method fails to identify genetic elements such as plasmids or linear chromosomes. Thus, we need to emphasize that the "missing" or "incomplete" pathways identified in this work are denoted solely on the basis of their absence from the single circular chromosome we were able to assemble from the massive starting pool of sequence data—however, this caveat applies to any metagenomic sequencing effort in which contaminating sequences are present.

Finally, there is a large number of hypothetical proteins encoded by both the '*Ca. L. solanacearum*' and '*Ca. L. asiaticus*' genomes

(Table 1). In both cases, greater than 30% of the total coding open reading frames are annotated as encoding hypothetical proteins. This is critical, as several biochemical pathways for key compounds are missing enzymatic activities, and in cases where entire pathways are missing, a known transporter for a particular compound is also absent. While we cannot rule out the presence of additional replicons in '*Ca. L. solanacearum*' or '*Ca. L. asiaticus*' that might encode such functionalities, elucidation of the function of these hypothetical proteins within '*Ca. L. solanacearum*' and '*Ca. L. asiaticus*' will likely provide further fundamental insights into how these organisms survive within their hosts and elicit the disease symptoms associated with ZC and HLB—perhaps leading to the development of several new treatment strategies for these agriculturally and economically-important diseases.

## Materials and Methods

### DNA enrichment and extraction

'*Ca. L. solanacearum*' ZC-1 genomic DNA was isolated from potato psyllids (*Bactericera cockerelli* Sulc) collected from potato fields in Dalhart, Texas, USA. Individual psyllids were ground in 50  $\mu$ L of PBS-BAS buffer (phosphate-buffered saline with 0.1% bovine serum albumin, pH 7.2). A 5  $\mu$ L aliquot was removed from each psyllid extract sample for DNA isolation. Extracted DNAs were tested for '*Ca. L. solanacearum*' DNA and Ct values were estimated using SYBR real-time PCR with '*Ca. L. solanacearum*'-specific primers (Table 1). Psyllid extracts with high titers of '*Ca. L. solanacearum*' DNA (Ct value  $\leq 18$ ) were pooled for further enrichment using an immunocapture method [7]. Briefly, the pooled extract was centrifuged at 1,000 $\times$ g for 1 min. The supernatant was transferred to a new tube and centrifuged at 10,000 $\times$ g for 5 min to collect bacterial cells. Cells were then re-suspended in 500  $\mu$ L of PBS-BAS buffer. To enrich target bacterial cells, an immunocapture approach was performed using a mixture of rabbit-derived polyclonal antibodies (GenScript Corp, NJ, USA) directed against '*Ca. L. solanacearum*' OMP-A (Ab-OMP-A) and '*Ca. L. solanacearum*' OMP-B (Ab-OMP-B) which were specific for two different synthesized peptides (OMP-A "GKDKKDSYGGKEQLC" and OMP-B "VIRRELGFSEGD-PIC"). Rabbit Ab-OMP-A and rabbit Ab-OMP-B were adjusted to 10  $\mu$ g/mL, respectively. Five microliters of Ab-OMP-A and Ab-OMP-B were added to the cell suspension and gently mixed on a rotator at 40 RPM for 5 hours or overnight at 4°C. Twenty  $\mu$ L of Dynabeads® M-280 Sheep anti-Rabbit IgG (Invitrogen, Carlsbad, CA) were then added to the suspension and incubation was continued for 2 hours. Cells were then collected with a magnetic stand. Prior to DNA extraction, collected cells were re-suspended in 25  $\mu$ L of DNase solution containing 5 U of DNase I (ABI, Foster City, CA) at 37°C for 30 minutes to help remove residual host DNA. Cells were then collected and washed with 1 mL of PBS-BAS buffer at least 4 times according to the manufacturer's protocol (Invitrogen, Carlsbad, CA). Collected cells were then used for DNA isolation. Precipitated DNA was dissolved in 10  $\mu$ L of water. One microliter of this DNA preparation was amplified using GenomiPhi whole genome amplification (WGA) kit following the manufacturer's recommendations (GE Life Sciences, NJ, USA). Real-time PCR showed that Ct values of '*Ca. L. solanacearum*' with and without immunocapture were 16.5 and 26, respectively. Thus, immunocapture enriched the target DNA nearly 700 fold (fold =  $2^{(26-16.5)}$ ).

### PCR confirmation and quantification

SYBR Quantitative real-time PCR was performed with Lso-F forward primers (5'-GTTCCCTTTTAAAATTACGTCAGC-3')

and Lso-R reverse primer (5'-GCCGTGTTGTTATATTTTC-CG-3') for '*Ca. L. solanacearum*'. A 20  $\mu$ L of 1  $\times$  SYBR master mixture (ABI, Foster City, CA) contains 5  $\mu$ M of forward/reverse primers and 20 ng of genomic DNA obtained either before or after immunocapture-amplified DNA as described above. PCR was carried out using a Bio-Rad IQ5 PCR cyclor. With the same amount DNA, samples with the lowest Ct values were selected for WGA. Amplified DNAs were purified by chloroform extraction and ethanol precipitation. DNA was checked on a 1% agarose gel and quantitated using the PicoGreen method (Invitrogen, Carlsbad, CA). DNA was stored at  $-20^{\circ}\text{C}$ .

#### 454 pyrosequencing

The '*Ca. L. solanacearum*' genome sequence was obtained in two phases. An initial genomic sequence was obtained from a half-plate 454 pyrosequencing run using a Roche GS-FLX Sequencer according to the manufacturer's standard procedures (Roche, Branford, CT, USA). Sequencing data were then assembled using gsAssembler software version 1.1 (Roche, Branford, CT, USA). A second half-plate 454 pyrosequencing run was conducted using a Roche GS-FLX Titanium Series Sequencer located at the University of Iowa's Carver Center for Genomics. Sequences underwent *de novo* assembly with Newbler version 2.0 (Roche, Branford, CT, USA).

#### '*Candidatus. Liberibacter solanacearum*' contig confirmation and gap closure

The GenBank accession number for the '*Ca. L. solanacearum*' genome is CP002371. To confirm that the assembled contigs belong to '*Ca. L. solanacearum*', *in silico* analyses were performed using nucleotide BLASTN and BLASTX against the '*Ca. L. asiaticus*' genome (GenBank accession # CP001677) with the cutoff E-value set at  $10^{-5}$ . The same analysis was also performed using a number of other phylogenetically-related prokaryotic genomes, including *Rhizobium etli* CIAT 652 (GenBank accession # CP000133), *Agrobacterium tumefaciens* C58 (GenBank accession # AE007869), and the *Wolbachia* endosymbiont of *Culex quinquefasciatus* Pel strain (GenBank accession # AM999887) with cutoff E-value set at  $10^{-20}$ . Contigs with top hit to the reference genomes containing 1 kbp or longer were selected for further analysis and PCR primers were designed to anneal to each contig end. PCR confirmation was carried out using DNA extracted from healthy potatoes (negative control) and potatoes exhibiting symptoms of ZC disease. To connect the '*Ca. L. solanacearum*' contigs, the relationships of the contigs were predicted by making an alignment against '*Ca. L. asiaticus*' genome. Primer pairs that bridged two candidate contig ends were amplified using conventional or long-distance PCR protocols. In addition, we also developed two protocols for gap closure of '*Ca. L. solanacearum*' chromosome. The first is an alignment-based contig extension method, conducted by taking 500 bp of both ends of the contig sequence as reference points and performing a BLAST search against all 454 sequence reads. A Perl script was written to extract sequence reads from matching subjects. The extracted sequence reads were then aligned with reference sequences by Cap3 alignment software (<http://seq.cs.iastate.edu/>). This alignment-based contig extension generated approximately 300–600 bp of consensus sequence that extended beyond each contig end. The second protocol used for gap closure was a genomic walking method [11]. This method usually extends sequences by 1–2 kbp beyond each existing contig end. If extended sequences overlapped with another contig, these connections were confirmed by PCR and then sequenced on an ABI 3130 Genetic Analyzer (ABI, Foster City, CA) to confirm their identity.

#### Genome comparison and orthologue identification

Open reading frames within the '*Ca. L. solanacearum*' genome were predicted using Molquest2 version 2.0.4.700 (<http://www.molquest.com/>). Genome annotation was conducted using multiple reference genomes, including '*Ca. L. asiaticus*' (GenBank accession # CP001677) and other related microbial genome databases obtained from GenBank. Similarity searches were performed by using BLASTX against the nonredundant protein database with a cutoff E value of  $10^{-20}$ . Each putative gene was then assigned to a category within the Clusters of Orthologous groups (COG) database. To be consistent with public database annotation, the final complete chromosome sequence was annotated using the NCBI Prokaryotic Genomes Automatic Annotation Pipeline server (PGAAP).

#### Molecular phylogenies

Amino acid sequences were retrieved from NCBI databases. In cases where multiple protein sequences were used to infer phylogeny, the amino acid sequences of the proteins of interest were concatenated and then subjected to phylogenetic analysis. The evolutionary history was inferred using the Neighbor-Joining method [104]. The optimal tree is shown in all cases. The percentage of replicate trees in which the associated taxa clustered together in the bootstrap test (1000 replicates) is shown next to the branches. The phylogenetic trees were linearized assuming equal evolutionary rates in all lineages. The trees are drawn to scale, with branch lengths in the same units as those of the evolutionary distances used to infer the phylogenetic trees. The evolutionary distances were computed using the Poisson correction method and are in the units of the number of amino acid substitutions per site. All positions containing gaps and missing data were eliminated from the dataset (Complete deletion option). Phylogenetic analyses were conducted in MEGA4 [105].

#### Supporting Information

**Figure S1 Schematic comparison of the '*Candidatus Liberibacter solanacearum*' P-I and P-II regions.** Alignment of the prophage I (P-I) and prophage II (P-II) sequences in '*Ca. L. solanacearum*' genome. Genes sharing homologous sequence relationships are linked by shading (TIF)

**Figure S2 Phylogeny of the NttA transporters.** Neighbor-joining tree showing the relationships between NttA protein sequences from several lineages. Bootstrap values are indicated for each node. (TIF)

**Figure S3 Comparisons of ArgB (NAGK) sequences.** (A) Schematic comparison of ArgB proteins from *E. coli*, '*Ca. L. solanacearum*', and *Pseudomonas aeruginosa*. The N-terminal signature sequence (NTSS), central lysine (K), and C-terminal signature sequences (CTSS) of the arginine-sensitive proteins are indicated. (B) Neighbor-joining tree showing the relationships between ArgB protein sequences from several lineages. Bootstrap values are indicated for each node. (TIF)

**Figure S4 Phylogenetic analysis of the '*Candidatus Liberibacter solanacearum*' thiamine transport system.** Neighbor-joining tree showing the relationships between concatenated sequences for all three hypothesized thiamine transporter components for the lineages shown. Bootstrap values are indicated for each node. (TIF)

**Figure S5 Phylogenetic analysis of the folate biosynthesis components FolB-FolK-FolP from ‘*Candidatus Liberibacter solanacearum*’.** Neighbor-joining tree showing the relationships between concatenated sequences for three folate synthesis proteins (FolB-FolK-FolP) for the lineages shown. Bootstrap values are indicated for each node.

(TIF)

**Figure S6 Phylogenetic analysis of FTR1 family members.** Neighbor-joining tree showing the relationships between FTR1 protein sequences from the lineages shown. Bootstrap values are indicated for each node.

(TIF)

**Figure S7 Phylogenetic analysis of the ferritin-like proteins.** Neighbor-joining tree showing the relationships between ferritin (Ftn) protein sequences from several lineages. Bootstrap values are indicated for each node.

(TIF)

**Figure S8 The ‘*Candidatus Liberibacter asiaticus*’ and ‘*Candidatus Liberibacter solanacearum*’ RTX toxin transport loci.** Schematics of the loci encoding components of the ‘*Ca. L. asiaticus*’ and ‘*Ca. L. solanacearum*’ Type I secretion system.

(TIF)

**Table S1 Conventional and long-distance PCR primers used for ‘*Candidatus Liberibacter solanacearum*’ sequence confirmation and gap close in this study.**

(XLSX)

**Table S2 Primers used for genomic walking.**

(XLSX)

**Table S3 List of ‘*Candidatus Liberibacter solanacearum*’ and ‘*Candidatus Liberibacter asiaticus*’ best hits.**

(XLSX)

**Table S4 List of ‘*Candidatus Liberibacter solanacearum*’-specific and ‘*Candidatus Liberibacter asiaticus*’-specific CDS.**

(XLSX)

**Table S5 Summary of transporter analysis from ‘*Candidatus Liberibacter solanacearum*’.**

(XLSX)

## Acknowledgments

We thank Ms. Parminder Sahota and Mr. Yang Bai for technical assistance with this project. We also thank Dr. Joseph Munyaneza and Dr. Venkatesan Sengod Gounder for providing the potato psyllids for this work. Trade names or commercial products in this publication are mentioned solely for the purpose of providing specific information and do not imply recommendation or endorsement by the United States Department of Agriculture.

## Author Contributions

Conceived and designed the experiments: HL BL EC YD. Performed the experiments: HL BL CC LZ. Analyzed the data: HL JG HD. Wrote the paper: JG HL HD EC DYP CMV.

## References

- Gudmestad NC, Secor GA (2007) Zebra Chip: A new disease of potato. *Nebr Potato Eyes* 19: 1–4.
- Secor GA, Rivera VV, Abad JA, Lee I-M, Clover GRG, et al. (2009) Association of ‘*Candidatus Liberibacter solanacearum*’ with zebra chip disease of potato established by graft and psyllid transmission, electron microscopy, and PCR. *Plant Dis* 93: 574–583.
- Hansen AK, Trumble JT, Stouthamer R, Paine TD (2008) A new huanglongbing species, ‘*Candidatus Liberibacter psyllaurosus*,’ found to infect tomato and potato, is vectored by the psyllid *Bactericera cockerelli* (Sulc). *Appl Environ Microbiol* 74: 5862–5865.
- Munyaneza JE, Fisher TW, Sengoda VG, Garczynski SF, Nissinen A, et al. (2010) Association of ‘*Candidatus Liberibacter solanacearum*’ with the psyllid, *Trioza apicalis* (Hemiptera: Trioziidae) in Europe. *J of Economic Entomol* 103: 1060–1070.
- Lin H, Doddapaneni H, Munyaneza JE, Civerolo EL, Sengoda VG, et al. (2009) Molecular characterization and phylogenetic analysis of 16S rRNA from a new ‘*Candidatus Liberibacter*’ strain associated with zebra chip disease of potato (*Solanum tuberosum* L.) and the potato psyllid (*Bactericera cockerelli* Sulc). *J of Plant Pathol* 91: 215–219.
- Gottwald TR (2010) Current epidemiological understanding of citrus huanglongbing. *Annu Rev of Phytopathol* 48: 119–139.
- Duan Y, Zhou L, Hall DG, Li W, Doddapaneni H, et al. (2009) Complete genome sequence of citrus huanglongbing bacterium, ‘*Candidatus Liberibacter asiaticus*’ obtained through metagenomics. *Mol Plant-Microbe Interactions* 22: 1011–1020.
- Vahling CM, Duan Y, Lin H (2010) Characterization of an ATP translocase identified in the destructive plant pathogen ‘*Candidatus Liberibacter asiaticus*’. *J Bacteriol* 192: 834–840.
- Vojnov A, Morais do Amaral A, Dow J, Castagnaro A, Marano M (2010) Bacteria causing important diseases of citrus utilise distinct modes of pathogenesis to attack a common host. *Appl Microbiol and Biotechnol* 87: 467–477.
- Margulies M, Egholm M, Altman WE, Attiya S, Bader JS, et al. (2005) Genome sequencing in microfabricated high-density picolitre reactors. *Nature* 437: 376–380.
- Lin H, Doddapaneni H, Bai X, Yao J, Zhao X, et al. (2008) Acquisition of uncharacterized sequences from ‘*Candidatus Liberibacter*’, an unculturable bacterium, using an improved genomic walking method. *Mol and Cellular Probes* 22: 30–37.
- Capela D, Barloy-Hubler F, Gouzy J, Bothe G, Ampe F, et al. (2001) Analysis of the chromosome sequence of the legume symbiont *Sinorhizobium meliloti* strain 1021. *Proc Natl Acad Sci U S A* 98: 9877–9882.
- González V, Santamaría RI, Bustos P, Hernández-González I, Medrano-Soto A, et al. (2006) The partitioned *Rhizobium etli* genome: Genetic and metabolic redundancy in seven interacting replicons. *Proc Natl Acad Sci U S A* 103: 3834–3839.
- Wood DW, Setubal JC, Kaul R, Monks DE, Kitajima JP, et al. (2001) The Genome of the natural genetic engineer *agrobacterium tumefaciens* C58. *Science* 294: 2317–2323.
- Li W, Abad JA, French-Monar RD, Rascoe J, Wen A, et al. (2009) Multiplex real-time PCR for detection, identification and quantification of ‘*Candidatus Liberibacter solanacearum*’ in potato plants with zebra chip. *J Microbiol Methods* 78: 59–65.
- Kotrba P, Inui M, Yukawa H (2001) Bacterial phosphotransferase system (PTS) in carbohydrate uptake and control of carbon metabolism. *Journal of Bioscience and Bioengineering* 92: 502–517.
- Bradley SA, Tinsley CR, Muiry JA, Henderson PJ (1987) Proton-linked L-fucose transport in *Escherichia coli*. *Biochem J* 248: 495–500.
- Essenberg RC, Candler C, Nida SK (1997) *Brucella abortus* strain 2308 putative glucose and galactose transporter gene: cloning and characterization. *Microbiol* 143: 1549–1555.
- Karley AJ, Douglas AE, Parker WE (2002) Amino acid composition and nutritional quality of potato leaf phloem sap for aphids. *J Exp Biol* 205: 3009–3018.
- Viola R, Roberts AG, Haupt S, Gazzani S, Hancock RD, et al. (2001) Tubercization in potato involves a switch from apoplastic to symplastic phloem unloading. *Plant Cell* 13: 385–398.
- Groeneveld M, Detert Oude Weme RGJ, Duurkens RH, Slotboom DJ (2010) Biochemical characterization of the C4-dicarboxylate transporter DctA from *Bacillus subtilis*. *J Bacteriol* 192: 2900–2907.
- Yurgel SN, Kahn ML (2004) Dicarboxylate transport by rhizobia. *FEMS Microbiol Rev* 28: 489–501.
- Vance CP (2002) Root-bacteria interactions: symbiotic N<sub>2</sub> Fixation. In: Waisel Y, Eshel A, Kafafi U, eds. *Plant Roots: The Hidden Half*. New York: Marcel Dekker, Inc. pp 839–868.
- Ramón-Maiques S, Fernández-Murga ML, Gil-Ortiz F, Vagin A, Fita I, et al. (2006) Structural bases of feed-back control of arginine biosynthesis, revealed by the structures of two hexameric N-acetylglutamate kinases, from *Thermotoga maritima* and *Pseudomonas aeruginosa*. *J of Mol Biol* 356: 695–713.
- Slater SC, Goldman BS, Goodner B, Setubal JC, Farrand SK, et al. (2009) Genome sequences of three *Agrobacterium* biovars help elucidate the evolution of multichromosome genomes in bacteria. *J Bacteriol* 191: 2501–2511.
- Young JP, Crossman L, Johnston A, Thomson N, Ghazoui Z, et al. (2006) The genome of *Rhizobium leguminosarum* has recognizable core and accessory components. *Genome Biol* 7: R34.
- Duurkens RH, Tol MB, Geertsma ER, Permentier HP, Slotboom DJ (2007) Flavin binding to the high affinity riboflavin transporter RibU. *J of Biol Chemistry* 282: 10380–10386.

28. Vogl C, Grill S, Schilling O, Stulke J, Mack M, et al. (2007) Characterization of riboflavin (Vitamin B2) transport proteins from *Bacillus subtilis* and *Corynebacterium glutamicum*. *J Bacteriol* 189: 7367–7375.
29. Rodionov DA, Hebbeln P, Eudes A, ter Beek J, Rodionova IA, et al. (2009) A Novel class of modular transporters for vitamins in prokaryotes. *J Bacteriol* 191: 42–51.
30. Rodionov DA, Li X, Rodionova IA, Yang C, Sorci L, et al. (2008) Transcriptional regulation of NAD metabolism in bacteria: genomic reconstruction of NiaR (YrxA) regulon. *Nucl Acids Res* 36: 2032–2046.
31. Locher KP, Lee AT, Rees DC (2002) The *E. coli* BtuCD Structure: A framework for ABC transporter architecture and mechanism. *Science* 296: 1091–1098.
32. Guillén-Navarro K, Araiza G, García-de los Santos A, Mora Y, Dunn MF (2005) The *Rhizobium etli* bioMNT operon is involved in biotin transport. *FEMS Microbiol Letters* 250: 209–219.
33. Eudes A, Erkens GB, Slotboom DJ, Rodionov DA, Naponelli V, et al. (2008) Identification of genes encoding the folate- and thiamine-binding membrane proteins in Firmicutes. *J Bacteriol* 190: 7591–7594.
34. Klaus SMJ, Kunji ERS, Bozzo GG, Noiriel A, de la Garza RD, et al. (2005) Higher plant plastids and cyanobacteria have folate carriers related to those of trypanosomatids. *J Biological Chemistry* 280: 38457–38463.
35. Webb E, Claas K, Downs D (1998) *thiBPQ* Encodes an ABC Transporter required for transport of thiamine and thiamine pyrophosphate in *Salmonella typhimurium*. *J of Biological Chemistry* 273: 8946–8950.
36. Dittrich S, Mitchell SL, Blagborough AM, Wang Q, Wang P, et al. (2008) An atypical orthologue of 6-pyruvoyltetrahydropterin synthase can provide the missing link in the folate biosynthesis pathway of malaria parasites. *Mol Microbiol* 67: 609–618.
37. Pribat A, Jeanguenlin L, Lara-Nunez A, Ziemak MJ, Hyde JE, et al. (2009) 6-pyruvoyltetrahydropterin synthase paralogs replace the folate synthesis enzyme dihydroneopterin aldolase in diverse bacteria. *J Bacteriol* 191: 4158–4165.
38. Gabelli SB, Bianchet MA, Xu W, Dunn CA, Niu Z-D, et al. (2007) Structure and function of the *E. coli* dihydroneopterin triphosphate pyrophosphatase: A nudix enzyme involved in folate biosynthesis. *Structure* 15: 1014–1022.
39. de Crecy-Lagard V, El Yacoubi B, de la Garza R, Noiriel A, Hanson A (2007) Comparative genomics of bacterial and plant folate synthesis and salvage: predictions and validations. *BMC Genomics* 8: 245.
40. Klaus SMJ, Wegkamp A, Sybesma W, Hugenholtz J, Gregory JF, et al. (2005) A nudix enzyme removes pyrophosphate from dihydroneopterin triphosphate in the folate synthesis pathway of bacteria and plants. *J Biological Chemistry* 280: 5274–5280.
41. Chan ACK, Doukov TI, Scofield M, Tom-Yew SAL, Ramin AB, et al. (2010) Structure and function of P19, a high-affinity iron transporter of the human pathogen *Campylobacter jejuni*. *J Molecul Biol* 401: 590–604.
42. Eichhorn H, Lessing F, Winterberg B, Schirawski J, Kamper J, et al. (2006) A ferroxidation/permeation iron uptake system is required for virulence in *Ustilago maydis*. *Plant Cell* 18: 3332–3345.
43. Ramanan N, Wang Y (2000) A high-affinity iron permease essential for *Candida albicans* virulence. *Science* 288: 1062–1064.
44. Reindel S, Anemüller S, Sawaryn A, Matzanke BF (2002) The DpsA-homologue of the archaeon *Halobacterium salinarum* is a ferritin. *Biochimica et Biophysica Acta (BBA) - Proteins & Proteomics* 1598: 140–146.
45. Zeth K, Offermann S, Essen L-O, Oesterhelt D (2004) Iron-oxo clusters biomineralizing on protein surfaces: Structural analysis of *Halobacterium salinarum* DpsA in its low- and high-iron states. *Proc Natl Acad Sci U S A* 101: 13780–13785.
46. Andrews SC (2010) The ferritin-like superfamily: Evolution of the biological iron storeman from a rubrerythrin-like ancestor. *Biochimica et Biophysica Acta (BBA) - General Subjects* 1800: 691–705.
47. Carrondo MA (2003) Ferritins, iron uptake and storage from the bacterioferritin viewpoint. *EMBO J* 22: 1959–1968.
48. Zhao G, Ceci P, Ilari A, Giangiacomo L, Lauc TM, et al. (2002) Iron and hydrogen peroxide detoxification properties of DNA-binding protein from starved cells: A ferritin-like DNA-binding protein of *Escherichia coli*. *J Biol Chemistry* 277: 27689–27696.
49. López-Soto F, León-Sicares N, Reyes-López M, Serrano-Luna J, Ordaz-Pichardo C, et al. (2009) Use and endocytosis of iron-containing proteins by *Entamoeba histolytica* trophozoites. *Infection, Genetics and Evol* 9: 1038–1050.
50. Paccello F, Ceci P, Ammendola S, Pasquali P, Chiancone E, et al. (2008) Periplasmic Cu,Zn superoxide dismutase and cytoplasmic Dps concur in protecting *Salmonella enterica* serovar Typhimurium from extracellular reactive oxygen species. *Biochimica et Biophysica Acta (BBA) - General Subjects* 1780: 226–232.
51. Yu M-j, Ren J, Zeng Y-l, Zhou S-n, Lu Y-j (2009) The *Legionella pneumophila* Dps homolog is regulated by iron and involved in multiple stress tolerance. *J Basic Microbiol* 49: S79–S86.
52. Dukan S, Touati D (1996) Hypochlorous acid stress in *Escherichia coli*: Resistance, DNA damage, and comparison with hydrogen peroxide stress. *J Bacteriology* 178: 6145–6150.
53. Gage DJ (2004) Infection and invasion of roots by symbiotic, nitrogen-fixing rhizobia during nodulation of temperate legumes. *Microbiol Mol Biol Rev* 68: 280–300.
54. Weidner S, Pühler A, Küster H (2003) Genomics insights into symbiotic nitrogen fixation. *Curr Opin in Biotechnol* 14: 200–205.
55. Drepper T, Wietaus J, Giaourakis D, Groß S, Schubert B, et al. (2006) Crosstalk towards the response regulator NtrC controlling nitrogen metabolism in *Rhodobacter capsulatus*. *FEMS Microbiology Letters* 258: 250–256.
56. Pawlkowski K, Klosse U, de Bruijn FJ (1991) Characterization of a novel *Azorhizobium caulinodans* ORS571 two-component regulatory system, NtrY/NtrX, involved in nitrogen fixation and metabolism. *Mol Gen Genet* 231: 124–138.
57. Gregor J, Zeller T, Balzer A, Habertzelt K, Klug G (2007) Bacterial regulatory networks include direct contact of response regulator proteins: interaction of RegA and NtrX in *Rhodobacter capsulatus*. *J Mol Microbiol Biotechnol* 13: 126–139.
58. Goley ED, Iniesta AA, Shapiro L (2007) Cell cycle regulation in *Caulobacter*: location, location, location. *J Cell Sci* 120: 3501–3507.
59. Zhang M, Duan Y, Zhou L, Turechek WW, Stover E, et al. (2010) Screening molecules for control of citrus Huanglongbing using an optimized regeneration system for *Candidatus Liberibacter asiaticus*-infected periwinkle (*Catharanthus roseus*) cuttings. *Phytopathol* 100: 239–245.
60. Barreteau H, Kova010D A, Boniface A, Sova M, Gobec S, et al. (2008) Cytoplasmic steps of peptidoglycan biosynthesis. *FEMS Microbiol Rev* 32: 168–207.
61. Bhavsar AP, Brown ED (2006) Cell wall assembly in *Bacillus subtilis*: how spirals and spaces challenge paradigms. *Molecul Microbiol* 60: 1077–1090.
62. Nanninga N (1991) Cell division and peptidoglycan assembly in *Escherichia coli*. *Molecul Microbiol* 5: 791–795.
63. Margolin W, Corbo JC, Long SR (1991) Cloning and characterization of a *Rhizobium meliloti* homolog of the *Escherichia coli* cell division gene *ftsZ*. *J Bacteriol* 173: 5822–5830.
64. Margolin W, Long SR (1994) *Rhizobium meliloti* contains a novel second homolog of the cell division gene *ftsZ*. *J Bacteriol* 176: 2033–2043.
65. Cheng J, Sibley CD, Zaher R, Finan TM (2007) A *Sinorhizobium meliloti* *minE* mutant has an altered morphology and exhibits defects in legume symbiosis. *Microbiol* 153: 375–387.
66. Lutkenhaus J (2007) Assembly dynamics of the bacterial MinCDE system and spatial regulation of the Z ring. *Annu Rev of Biochemistry* 76: 539–562.
67. Butala M, ŽgurBertok D, Busby S (2009) The bacterial LexA transcriptional repressor. *Cellul Molecul Life Sciences* 66: 82–93.
68. Kimsey HH, Waldor MK (2009) *Vibrio cholerae* LexA coordinates CTX prophage Gene Expression. *J Bacteriol* 191: 6788–6795.
69. Le Chatelier E, Bécherel OJ, d'Alençon E, Canceill D, Ehrlich SD, et al. (2004) Involvement of DnaE, the second replicative DNA polymerase from *Bacillus subtilis*, in DNA mutagenesis. *J Biological Chemistry* 279: 1757–1767.
70. Bridges BA, Woodgate R, Ruiz-Rubio M, Sharif F, Sedgwick SG, et al. (1987) Current understanding of UV-induced base pair substitution mutation in *E. coli* with particular reference to the DNA polymerase III complex. *Mutat Res* 181: 219–226.
71. Mauldin SK, Freeland TM, Deering RA (1994) Differential repair of UV damage in a developmentally regulated gene of *Dictyostelium discoideum*. *Mutat Res* 314: 187–198.
72. Katsiou E, Nickel CM, Garcia AF, Tadros MH (1999) Molecular analysis and identification of the radC gene from the phototrophic bacterium *Rhodobacter capsulatus* B10. *Microbiol Res* 154: 233–239.
73. Sanchez H, Cardenas PP, Yoshimura SH, Takeyasu K, Alonso JC (2008) Dynamic structures of *Bacillus subtilis* RecN–DNA complexes. *Nucl Acids Research* 36: 110–120.
74. Wang G, Maier RJ (2008) Critical Role of RecN in Recombinational DNA Repair and Survival of *Helicobacter pylori*. *Infect Immun* 76: 153–160.
75. Murray NE (2000) Type I Restriction Systems: Sophisticated Molecular Machines (a Legacy of Bertani and Weigle). *Microbiol Mol Biol Rev* 64: 412–434.
76. Pingoud A, Fuxreiter M, Pingoud V, Wende W (2005) Type II restriction endonucleases: structure and mechanism. *Cellular and Mol Life Sciences* 62: 685–707.
77. Alian A, Lee TT, Griner SL, Stroud RM, Finer-Moore J (2008) Structure of a TrmA–RNA complex: A consensus RNA fold contributes to substrate selectivity and catalysis in m5U methyltransferases. *Proc Natl Acad Sci U S A* 105: 6876–6881.
78. Persson BC, Gustafsson C, Berg DE, Björk GR (1992) The gene for a tRNA modifying enzyme, m5U54-methyltransferase, is essential for viability in *Escherichia coli*. *Proc Natl Acad Sci U S A* 89: 3995–3998.
79. Frees D, Varmanen P, Ingmer H (2001) Inactivation of a gene that is highly conserved in Gram-positive bacteria stimulates degradation of non-native proteins and concomitantly increases stress tolerance in *Lactococcus lactis*. *Molecul Microbiol* 41: 93–103.
80. Kline KA, Dodson KW, Caparon MG, Hultgren SJ (2010) A tale of two pili: assembly and function of pili in bacteria. *Trends in Microbiol* 18: 224–232.
81. Clock SA, Planet PJ, Perez BA, Figurski DH (2008) Outer membrane components of the Tad (Tight Adherence) secretin of *Aggregatibacter actinomycetemcomitans*. *J Bacteriol* 190: 980–990.
82. Thormann KM, Paulick A (2010) Tuning the flagellar motor. *Microbiol*: 156: 1275–83.
83. Bové JM (2006) Huanglongbing: A destructive, newly-emerging, century-old disease of citrus. *J Plant Pathol* 88: 7–37.



84. Linhartová I, Bumba L, Main J, Basler M, Osíčka R, et al. (2010) RTX proteins: a highly diverse family secreted by a common mechanism. *FEMS Microbiol Rev* 34: 1076–1112.
85. Shrivastava R, Miller JF (2009) Virulence factor secretion and translocation by *Bordetella* species. *Curr Opin in Microbiol* 12: 88–93.
86. Dalbey RE, Chen M (2004) Sec-translocase mediated membrane protein biogenesis. *Biochimica et Biophysica Acta (BBA) - Mol Cell Research* 1694: 37–53.
87. Mori H, Ito K (2001) The Sec protein-translocation pathway. *Trends in Microbiol* 9: 494–500.
88. Bechtluft P, Nouwen N, Tans SJ, Driessen AJM (2010) SecB-A chaperone dedicated to protein translocation. *Mol BioSystems* 6: 620–627.
89. Driessen AJM, Nouwen N (2008) Protein translocation across the bacterial cytoplasmic membrane. *Annu Rev of Biochemistry* 77: 643–667.
90. De Buck E, Lammertyn E, Anné J (2008) The importance of the twin-arginine translocation pathway for bacterial virulence. *Trends in Microbiol* 16: 442–453.
91. Sargent F (2007) The twin-arginine transport system: moving folded proteins across membranes. *Biochemical Society Transactions* 035: 835–847.
92. Alvarez-Martinez CE, Christie PJ (2009) Biological diversity of prokaryotic type IV secretion systems. *Microbiol Mol Biol Rev* 73: 775–808.
93. Mota LJ, Sorg I, Cornelis GR (2005) Type III secretion: The bacteria-eukaryotic cell express. *FEMS Microbiol Letters* 252: 1–10.
94. Gharalari AH, Nansen C, Lawson DS, Gilley J, Munyaneza JE, et al. (2009) Knockdown mortality, repellency, and residual effects of insecticides for control of adult *Bactericera cockerelli* (Hemiptera: Psyllidae). *J Econ Entomol* 102: 1032–1038.
95. Munyaneza JE, Crosslin JM, Upton JE (2007) Association of *Bactericera cockerelli* (Homoptera: Psyllidae) with “zebra chip,” a new potato disease in southwestern United States and Mexico. *J Econ Entomol* 100: 656–663.
96. Chapon V, Czjzek M, El Hassouni M, Py B, Juy M, et al. (2001) Type II protein secretion in gram-negative pathogenic bacteria: the study of the structure/secretion relationships of the cellulase cel5 (formerly EGZ) from *Erwinia chrysanthemi*. *J of Molecul Biology* 310: 1055–1066.
97. Poueymiro M, Genin S (2009) Secreted proteins from *Ralstonia solanacearum*: a hundred tricks to kill a plant. *Curr Opinion in Microbiology* 12: 44–52.
98. Szczesny R, Jordan M, Schramm C, Schulz S, Cogez V, et al. (2010) Functional characterization of the Xcs and Xps type II secretion systems from the plant pathogenic bacterium *Xanthomonas campestris* pv *vesicatoria*. *New Phytologist* 187: 983–1002.
99. Davison J (1999) Genetic exchange between bacteria in the environment. *Plasmid* 42: 73–91.
100. Serfotis-Mitsa D, Roberts GA, Cooper LP, White JH, Nutley M, et al. (2008) The Orf18 gene product from conjugative transposon Tn916 Is an ArdA antirestriction protein that inhibits Type I DNA restriction-modification systems. *J Mol Biol* 383: 970–981.
101. Song H, Hwang J, Yi H, Ulrich RL, Yu Y, et al. (2010) The early stage of bacterial genome-reductive evolution in the host. *PLoS Pathog* 6: e1000922.
102. Nyilasi I, Papp T, Csereletics Á, Krizsán K, Nagy E, et al. (2008) High-affinity iron permease (*FTR1*) gene sequence-based molecular identification of clinically important Zygomycetes. *Clinical Microbiology and Infection* 14: 393–397.
103. Wulff NA, Eveillard S, Foissac X, Ayres AJ, Bové JM (2009) rRNA operons and genome size of ‘*Candidatus Liberibacter americanus*’, a bacterium associated with citrus huanglongbing in Brazil. *Int J Syst Evol Microbiol* 59: 1984–1991.
104. Saitou N, Nei M (1987) The neighbor-joining method: a new method for reconstructing phylogenetic trees. *Mol Biol Evol* 4: 406–425.
105. Tamura K, Dudley J, Nei M, Kumar S (2007) MEGA4: Molecular evolutionary genetics analysis (MEGA) software version 4.0. *Mol Biol Evol* 24: 1596–1599.
106. Fernandez-Murga ML, Gil-Ortiz F, Llacer JL, Rubio V (2004) Arginine biosynthesis in *Thermotoga maritima*: Characterization of the Arginine-Sensitive N-Acetyl-L-Glutamate Kinase. *J Bacteriol* 186: 6142–6149.
107. Hass D, Holloway BW, Schamböck A, Leisinger T (1977) The genetic organization of arginine biosynthesis in *Pseudomonas aeruginosa*. *Mol Gen Genet* 154: 7–22.
108. Ikeda M, Mitsuhashi S, Tanaka K, Hayashi M (2009) Reengineering of a *Corynebacterium glutamicum* L-Arginine and L-Citrulline Producer. *Appl Environ Microbiol* 75: 1635–1641.
109. Picard FJ, Dillon JR (1989) Cloning and organization of seven arginine biosynthesis genes from *Neisseria gonorrhoeae*. *J Bacteriol* 171: 1644–1651.
110. Fernandez-Murga ML, Rubio V (2008) Basis of arginine sensitivity of microbial N-acetyl-L-glutamate kinases: mutagenesis and protein engineering study with the *Pseudomonas aeruginosa* and *Escherichia coli* enzymes. *J Bacteriol* 190: 3018–3025.
111. Ramón-Maiques S, Marina A, Gil-Ortiz F, Fita I, Rubio V (2002) Structure of acetylglutamate kinase, a key enzyme for arginine biosynthesis and a prototype for the amino acid kinase enzyme family, during catalysis. *Structure* 10: 329–342.
