# Supplementary material for: The Complete Genome Sequence of ‘Candidatus Liberibacter solanacearum’, the Bacterium Associated with Potato Zebra Chip Disease
Source: PLoS One. 2011 Apr 28;6(4):e19135. doi: 10.1371/journal.pone.0019135 (PMC3084294; doi:10.1371/journal.pone.0019135)
Supplement: Table S1 — Conventional and long-distance PCR primers used for ‘ Candidatus Liberibacter. solanacearum’ sequence confirmation and gap close in this study. (XLSX) [file pone.0019135.s009.xlsx]

## Sheet: Sheet1
Table-S1 Primers used for Lso contig confirmation and gap close
Primers used for contig confirmation
Primer Name	base pair	Sequences (5' ----------3')		Genome location
ZC-1F	22	AAAGTCGTTTCAGCAGTAGAGG		110268	110289
ZC-2F	22	CATTGTTGAAAGTCGGGAAAGC		513078	513099
ZC-3F	22	TAAGTAGAAGGTCGTCCAATCC		564019	564040
ZC-4F	18	CAAGAGGTCAGCGGTTCG		352564	352547
ZC-5F	19	TGTCGCACCTGATTCATCC		148511	148528
ZC-6F	19	CAGGCGATACGGTTGAAGG		278843	278825
ZC-7F	22	AAAGTCGTTTCAGCAGTAGAGG		110268	110289
ZC-8F	22	AAAGAACAGGCTCAGACAAAGG		394687	394666
ZC-9F	20	TCACCATAATCGCCAAGAGC		1025629	1025648
ZC-10F	22	CAGATGCTCTACCTCCTTCTTC		459583	459604
ZC-11F	22	TAAAGGGCTGGTAAGTTGATGG		90039	90018
ZC-12F	22	CTTGAACATGAACGTGGAATCC		910559	910538
ZC-13F	21	AAACGGAAAGGCTGTTATGTC		396250	396270
ZC-14F	22	GTTCCCACTCTCATCAAATCTC		1007044	1007065
ZC-15F	22	AAGGAGAACGGCTTGAATATGG		899575	899554
ZC-16F	22	ACGAGTGGCACTATTAGTTACG		805500	805521
ZC-17F	22	AATGTCTCAGTGTTGTGTTCTC		869651	869630
ZC-18F	22	AGCAGTATTCACCATTACATCC		643576	643555
ZC-19F	18	GCGGCGTGGTTCTACTTC		282104	282121
ZC-20F	18	TTGTGGTGCTCGTGATGG		245234	245217
ZC-21F	21	ATGTGAGGAAGCGGATATACC		680609	680589
ZC-22F	18	TGCCATCCGCCACAGTAG		1192287	1192304
ZC-23F	20	TCGTGGCATTTGAGGTTTGG		940649	940630
ZC-24F	21	ACAAACAGGAGTCACGGTATC		90561	90581
ZC-25F	22	TTATTTAACAGCGGAAGCATGG		1094206	1094185
ZC-26F	22	TGGATACGGGCAAGATTACAAG		444588	444567
ZC-27F	22	TCGGTTTTATGATTCGCAAAGG		770245	770266
ZC-28F	21	CAAGCGTTGTTCGTGATGTAG		720775	720795
ZC-29F	21	TCCACCGTGTAAACAGAGAAG		497178	497198
ZC-30F	21	GTAATGCGGAGAGAGGATTCG		1000382	1000362
ZC-31F	19	GTGGATGTGGCGGAATAGG		8943	8961
ZC-32F	18	CTACGGTCTCTGCGATGG		804618	804601
ZC-33F	20	CAACGTCAACACAGGAGAGG		1168281	1168300
ZC-34F	21	TTGATGACTTCTCCGCTGTTG		458673	458653
ZC-35F	22	GTTAGAGCCGAATACAGAAGTG		955530	955509
ZC-36F	20	GCTGGTGCGGAAATTGTAGG		683577	683596
ZC-37F	22	TGAACAAGCATGGATTGAGAAG		1125462	1125441
ZC-38F	22	GCACGCTAATTACATCTCAACG		698912	698933
ZC-39F	22	CCGACGAACAATCTAACTTACC		1136007	1136028
ZC-40F	21	TGACACACTAGCAGCATAACC		48529	48549
ZC-41F	22	ACGAGAACATCATAGCGATTGG		769891	769870
ZC-42F	22	AAGGAGAGCACTATGAGAGAGG		1111839	1111818
ZC-43F	21	GAAGCGTTCAATTCAGTCAGG		1067566	1067546
ZC-44F	20	CCCGAGCAAGACAGTTTAAC		1183502	1183521
ZC-45F	22	GGGTGGCTAATACAGGTAAACG		1156098	1156119
ZC-46F	22	AGATTTAAGCACATCGCATACG		26483	26504
ZC-47F	18	GGGCGAGGCATTGTTTCC		1135254	1135237
ZC-48F	22	TGACTCTCATAGCCTTGTTAGC		194913	194934
ZC-49F	20	CGCTGAAGTTCGCTCTTACC		978417	978398
ZC-50F	19	GTGATGTGCCGCTTGTTCC		648128	648146
ZC-51F	21	CCCTGATAACGGAGTTGATGG		712512	712532
ZC-52F	20	CGACAAATCACACCCAGAGG		1095517	1095536
ZC-53F	22	AGTTCGTAGGATGGTAGAATGG		36804	36825
ZC-54F	22	TATGGTGGTTTGTTTGGTAGGG		1074149	1074128
ZC-55F	20	GTTGGAACCGCATACTTAGC		1150747	1150766
ZC-56F	19	ACCACAACTCGCACAGAAG		43080	43098
ZC-57F	22	GATACTCCGCCCATCAATAAGG		756339	756360
ZC-58F	20	TTGCGAATGGTTCCGTTAGG		916508	916489
ZC-59F	22	ACTGGAAAAGTGGAAATGTACC		956208	956229
ZC-60F	19	CTCGCCTCAAGACCAATCG		217424	217442
ZC-61F	22	GATAGCGATGTTGTCAGTAACC		981197	981218
ZC-62F	20	GCGGAGACCAATCACTATCG		658256	658237
ZC-63F	21	TTTGACTGTTGAAGCCAATGC		843571	843551
ZC-64F	19	TCCTCCAGCAACCCTTACG		920339	920321
ZC-65F	22	TTTCTTGTCCCTGAATCTGTCC		1146868	1146889
ZC-66F	22	ACCAACAGACAAGACGTATAGG		496363	496342
ZC-67F	18	ACCGAAGACGCCCAATCC		353772	353789
ZC-68F	22	GCATAACCTCAGGCGATAATGG		968871	968892
ZC-69F	22	TGCTCTCGTCACAGATAATACC		835017	834996
ZC-70F	17	GCAACGCAACCCGAACG		646838	646822
ZC-71F	22	ATTGTTGGTGCGATAGTATTGG		35879	35858
ZC-72F	22	TGTCGGAACAATAAAGCAGAGG		709844	709865
ZC-73F	21	TTGGGTGTGAAAGAACATGGC		6357	6337
ZC-74F	22	AATAGACCCTGAAACCGAATGC		308621	308642
ZC-75F	22	TCAGCAACCTTCATAGATACAG		1126065	1126086
ZC-76F	22	TTGGATGTGTAGGAACAGATGG		698648	698627
ZC-77F	21	GTGCTTCGCTGTATGTATTGC		203810	203830
ZC-78F	22	CTTCTGCCACAACAATAGATCG		2043	2064
ZC-79F	21	TGCTGGCATGAAGAATACAAG		836992	836972
ZC-81F	22	GTAAGATAAGCGACGAACAAAC		752950	752971
ZC-82F	21	GCCAATGCCTAATACACCAAG		838880	838860
ZC-83F	21	TATTGTTGCGACTGCTAATGC		719014	719034
ZC-84F	21	TCTCGCCTCTACAATGACTGG		1166129	1166149
ZC-85F	22	ACAGAATCTACGCTAGGAAACG		7041	7062
ZC-86F	21	CTGAGTACATTCCGCAAGAGG		190768	190788
ZC-87F	22	TTCTTCTTATGCCCTTGCTCTC		613366	613345
ZC-88F	21	ATGCTTACAGGCGTTATCAGG		1164567	1164587
ZC-89F	21	GCCGCTACCACCTTATATTGC		1103491	1103471
ZC-90F	21	ACAATGCGGCTATAAGGATGG		681349	681369
ZC-91F	22	ACAGAGAACAATGCCAGATTCG		24110	24131
ZC-92F	20	GGTGCGGGATTGCTATAACG		844745	844726
ZC-93F	20	GCCTATCTTCGTCGCAATCC		1252744	1252763
ZC-94F	21	CGCCTATCGTCATCTCAATCC		211747	211767
ZC-95F	22	CCCCTAGTCCCTATTTGTTTTG		968622	968601
ZC-96F	19	CCGAAGCCACAAACGAAGG		1075151	1075133
ZC-97F	20	CGTTGAGCTTCCTGAAATCG		870568	870587
ZC-98F	17	AGCGATGCGGGCAATCC		211232	211216
ZC-99F	19	CAGCGTAATAGGCGTCAGC		207443	207427
ZC-100F	22	GCTGGAATAGAAGGGCTAGAAG		1214214	1214235
ZC-101F	22	ATAACCCTTTGTATTGCGATGG		1112038	1112059
ZC-102F	20	TATGAGGAGGCAACGAATGG		206781	206800
ZC-103F	22	GGATTACATCAACACCAGAACG		280281	280302
ZC-104F	21	TTGTGCTTGCCTTCCTAATCG		1191843	1191823
ZC-105F	21	AGCATCGTTCGTTAGTCATCG		213014	213034
ZC-106F	18	ACCGCCGAGGATTAGACG		193931	193948
ZC-107F	19	CGATACGAACCGCCATAGC		190506	190488
ZC-108F	20	ACAATCAGCGAATCCACGAG		942346	942327
ZC-109F	22	ATCCTTTTGATGCTGCTTATCG		285	264
ZC-110F	22	CAATAGTCGTCGTAGCAGGATG		395392	395413
ZC-111F	22	CTGTTAATACCGCTCCATCTCC		1396	1375
ZC-112F	22	AGCACATCATCACTACAACTCC		200200	200183
ZC-113F	21	GCAAATAGTCCCTGTCAATCC		353370	353350
ZC-114F	20	CATCTAGTGCGGGAGTAACG		962192	962173
ZC-115F	20	CAAGGACCACCTACCATAGC		193014	193033
ZC-116F	21	CTGCGACATCCTGCTTAGAAG		980007	979987
ZC-117F	20	CGATTGTGTTAAGCCAGAGC		647181	647200
ZC-118F	18	CTTCGCCACTGGTGTTCC		306657	306640
ZC-119F	22	TTCAACAATTTGTCCCTGATCC		979264	979243
ZC-120F	20	TTTAGCGGGTGGATATAGCC		192788	192769
ZC-121F	21	TTAAGAGGGTTGTCGGCATTG		1059818	1059798
ZC-122F	22	ACCATCCGATTTGAGTGTAAGG		279496	279517
ZC-123F	22	TCGGATGCGTAGAATTAGGAAG		57379	57358
ZC-124F	22	TGGTCCATCTACAGATTTAGGG		1068418	1068397
ZC-125F	21	AGTTGTTCGTATGTGTATCCG		1163914	1163894
ZC-126F	20	GGCGATAGGACACTTCAACC		208071	208052
ZC-127F	20	CAATCCCGCACCTTTTGAAC		844734	844749
ZC-128F	21	CCATACCATCGCATCAAGAGG		683309	683289
ZC-129F	19	GAGCGAGGGTGAGGAAGTC		208863	208881
ZC-130F	19	TCTGATACGCCCCAAATCC		459470	459452
ZC-131F	22	ATAACCTTTATGCGAATGTGTG		25994	25973
ZC-132F	21	CTTGCCTTTAGCTTGGAACTC		208623	208603
ZC-133F	22	TTCTGTGGCTTCTATGACTCTC		194899	194920
ZC-134F	22	TCCTATCCGCTCAATCATTTGC		1255436	1255416
ZC-1R	22	GTCACCGTTGAACAGAATATGC		110830	110809
ZC-2R	21	GTGCGTCTTCTACCCAAATCC		513875	513855
ZC-3R	19	CGCTTCATCTAGGCTAGGC		564687	564669
ZC-4R	21	CATAGGGCGTCTAATCCAAGG		351884	351904
ZC-5R	22	AGGGCTATTTAAGGGTACTCTC		150321	150300
ZC-6R	22	GCACGACATAAACGGGTAATAG		278303	278324
ZC-7R	22	GTCACCGTTGAACAGAATATGC		110830	110809
ZC-8R	19	CTGCGGTGGCTAGAGATGG		394067	394085
ZC-9R	22	TGCTAGTCATGTTGTTGAAAGG		1026212	1026191
ZC-10R	22	ATACACTGCCAAAGACATAACG		460345	460324
ZC-11R	20	CTGGCGATCATGCTATCACC		89515	89534
ZC-12R	19	GAATACCTCCGCCAACACC		910064	910082
ZC-13R	22	GCTTAGGAGGATTCATTCTACC		396801	396780
ZC-14R	22	AAATCATCGGCAAATTCAGGAG		1007549	1007528
ZC-15R	19	GGGTTGGCTGCTCTTTTGC		899042	899060
ZC-16R	19	ATTGTGAGGGCAGGGAGTC		806049	806031
ZC-17R	20	ACGAGTCCATACGCAAGAAG		868983	869002
ZC-18R	22	TAATTCGTTGTTGTGTTCTTCC		643132	643153
ZC-19R	22	AATCTGAGGTTTGGTCTGGTAG		282528	282507
ZC-20R	21	TTACATAGGACAAGGCGTAGG		244447	244467
ZC-21R	21	GGGCGTGATGATGTTAATTGG		680087	680107
ZC-22R	22	CATCCCGTCTTATTGCTTTTGG		1192706	1192685
ZC-23R	19	CGGAATGGTTACGCAGAGG		940116	940134
ZC-24R	21	CACTTCAGAGCCACGGATATC		91284	91264
ZC-25R	22	GCACTACTTGGAAAGAAGAAGG		1093721	1093742
ZC-26R	22	TGACTCTGGAACAGGTTATAGC		444151	444172
ZC-27R	22	TCCAATAGAATAGGCAGCATCC		770810	770789
ZC-28R	22	CAGAAGGCTGAATTGATGTTCC		721322	721301
ZC-29R	22	TTGTGAAAGCATTTGAAAGACG		497704	497683
ZC-30R	22	ACCACAGAACTGCTAGAAGAAC		999844	999865
ZC-31R	17	GCGGCACTGGCATAACG		9626	9610
ZC-32R	22	GGCAAGAAGAAACAATCAAAGG		804132	804153
ZC-33R	22	TATCACCGATGAAGGCATAAGG		1168721	1168700
ZC-34R	22	ATGTCATTGGCATTTGGAAAGG		458079	458100
ZC-35R	21	AAGGAGAAGACGGACAATACG		954828	954848
ZC-36R	21	TCGTGAATTAGCAGGCAATCC		684113	684093
ZC-37R	21	CGCAACTGATATTGGCTAAGG		1124911	1124931
ZC-38R	22	CTCAGGGAACAAATGGGATACC		699396	699375
ZC-39R	21	CATTCTCTTCTCCAGGCAAGG		1136582	1136562
ZC-40R	22	AGCCTTATTGGGTTTCGTATCC		48929	48908
ZC-41R	19	AAGCGGGAGCGATTATTGC		769130	769148
ZC-42R	21	ACCTGAAGGAGGAGACAATGG		1111344	1111364
ZC-43R	20	ACATAGGCAGCACCATAAGC		1066877	1066896
ZC-44R	22	TCCATGTATAAGCCAGAGATCC		1183939	1183918
ZC-45R	22	GCTGGTTATGTTGGTGAAGATG		1156581	1156560
ZC-46R	22	AAGTGAGTGTATTAACGCTTGC		26910	26889
ZC-47R	22	ATTCTGGAGACGAACTGACATC		1134783	1134804
ZC-48R	22	TTGATGATAATGAAGCCGATGC		1234062	1234041
ZC-49R	20	GTTGGAATGCTGCTTGTTGG		977662	977681
ZC-50R	22	TACGACGACGACGATTTACTTG		648556	648535
ZC-51R	19	TGTGCTGAAGTGCGAATGC		713174	713156
ZC-52R	22	TATTACAACCACCTGAGGAACC		1095954	1095933
ZC-53R	22	TGGTGCCTGATGTATGTATTCC		37389	37368
ZC-54R	22	TTGGCGTATTCCTGATGGTATG		1073580	1073601
ZC-55R	19	CCGAGAGGAACCCATAACC		1151229	1151211
ZC-56R	22	GTCCAGAGAGAAAATCCTTAGC		43479	43458
ZC-57R	20	CATCTCCGTTGTCAGCAAGG		756929	756910
ZC-58R	21	CCGACGCCTTAACTAATCTCC		915949	915969
ZC-59R	22	GAGAAGCACTATTGGAACTAGC		956654	956633
ZC-60R	22	TTCATAAAGACGACGGATAGCC		217832	217811
ZC-61R	22	GTGTCTATGGAACTCCTCTAGG		981724	981703
ZC-62R	22	TTGATTCGGGAAACCTTAATGC		657647	657668
ZC-63R	20	CGGTGTGACGGGTGAATATC		843103	843122
ZC-64R	22	CGCCTCCGACTAATAATCCATC		919765	919786
ZC-65R	21	CTACTGTTGGTGCTCCTTACG		1147353	1147333
ZC-66R	22	ATTTGTTCGGACTTGGAATTGC		495938	495959
ZC-67R	20	GGAACACCCATCACCACAAG		354437	354418
ZC-68R	22	TGGCAGTTTGTTTGGGAATACG		969323	969302
ZC-69R	21	AGCGACTCATTGACATAGACC		834493	834513
ZC-70R	22	GTGAGTTCTGATCTGAGGATGG		646359	646380
ZC-71R	21	ACAAGGAAGGACAGAAGAAGC		35362	35382
ZC-72R	22	CAGGGATCAGCAGGAGTTAATC		710536	710515
ZC-73R	22	CCTTTTCCTCTCTTCGCTATGC		5851	5872
ZC-74R	19	CCGCTACCACTCGCTTACC		617659	617641
ZC-75R	22	TGGAGTAATTGTGTGACTAACC		1126628	1126607
ZC-76R	21	CCGAATCGCAGGGTAGTAATG		697940	697960
ZC-77R	20	AGGTGAACGAGACGGTATCC		204324	204305
ZC-78R	19	AGTAGTCCACCTGCCAAGC		2466	2448
ZC-79R	21	GAGTGGGTCATCATCATTGTG		836527	836547
ZC-80R	19	CTGCCTCCTTACGGTTAGC		307402	307384
ZC-81R	22	AGCAGAAGACAATGAAGAATGG		753483	753462
ZC-82R	22	CAGCCATAGCCTTAGTTCAATC		838336	838357
ZC-83R	22	TTATTTGACTTTCAGCCCATCC		719480	719459
ZC-84R	22	AACAAGTTCGTCGTGAATTTGC		1166804	1166783
ZC-85R	18	ACAGGCTGGCAGGTTAGG		7471	7454
ZC-86R	20	GAAGTATCGCCCGCTTTACG		190128	190147
ZC-87R	22	GCTCTAAGTTATTGCGGATTCG		612960	612981
ZC-88R	22	TCGCAGATTGATTCTCCTTAGG		1164999	1164978
ZC-89R	21	ACTCCACAAAATGCCGATACC		1102982	1103002
ZC-90R	22	TGGGATCAGATTCTCGTATTGC		682059	682038
ZC-91R	22	TTAGGGAGAAATCGGCGTTTAG		24739	24718
ZC-92R	21	CCAACAGATTCAGGAGTGAGC		844145	844165
ZC-93R	18	CGCTGTGCCGATGAATGG		1253408	1253391
ZC-94R	19	CCGTCGTTGTGCTTGTTCC		212343	212325
ZC-95R	21	GCAAGATAACGATCACGATCC		968163	968183
ZC-96R	19	CTGAACATCCGCACGATCC		1074612	1074630
ZC-97R	22	TGCGTTTTATCGTTCTTATCCC		871232	871211
ZC-98R	20	TGATGACTACGGCGAAGAGG		210813	210832
ZC-99R	21	GCAGTAGAACAAGCGGATAGG		206857	206875
ZC-100R	21	TGGATTGATGGCTTGAACACC		1214644	1214624
ZC-101R	19	CATCCGGCGATAGAAGAGC		1112584	1112566
ZC-102R	21	AATCACAACACCACAAGAACC		207238	207218
ZC-103R	17	TGCGACAAGCGGGAAGG		280817	280801
ZC-104R	22	CTCTCTGCCAACTCATAATCCC		1191123	1191144
ZC-105R	22	AGAGAAGCAGGTTGGTTTAAGG		213510	213489
ZC-106R	22	AAACGCTTGGATGATGTTATGG		194349	194328
ZC-107R	21	TTCACCAGCACATCTTATCCG		191298	191278
ZC-108R	21	CAAGCGATGTCACTATCAACG		941739	941759
ZC-109R	21	CTCTCCTCACAAGACCAATCC		1257941	1257961
ZC-110R	22	GCACTGGCAAATGAAGATAGGG		395976	395955
ZC-111R	21	CAAATCAGCAACCGCATAAGG		693	713
ZC-112R	22	CTAATAAACGGCGTAGCAAACC		199867	199884
ZC-113R	22	CAGAATCAGTATCATCGTCAGC		352757	352778
ZC-114R	22	TTAACCGTCACATCTCCTTCTC		961532	961553
ZC-115R	19	CAGAACAGAGCGGATGACC		193430	193412
ZC-116R	21	TCCACTCCGACCACGTATTAG		979551	979571
ZC-117R	22	AAAGGGACGCCATAAAATATCG		647725	647704
ZC-118R	18	GCAGACGGGTGAGTAACG		306067	306084
ZC-119R	22	GTTCGTCGTGATATTGGTATGG		978839	978860
ZC-120R	22	ACTCAAATAAACATCGGCAAGG		192276	192297
ZC-121R	20	TTGGCTATCACGCAATGACC		1059366	1059385
ZC-122R	22	GGACACGGTATTACTCCACAAG		279927	279906
ZC-123R	21	ACACTACACAACGGAAGAACC		56765	56785
ZC-124R	20	GCAACGATGTATCACGAACG		1068018	1068037
ZC-125R	22	ATAGGGTAAACGATTTGTTAGG		1163441	1163462
ZC-126R	22	TTCCAAACCACAAACAACAACC		207655	207676
ZC-127R	22	ATCCACCAACAATCGTCATTAG		1147177	1147190
ZC-128R	22	CGAGATGTTTAGCGTGCAATAC		682772	682793
ZC-129R	21	GCTTTGCGATCTCTCTACTGC		209306	209286
ZC-130R	22	TCCAATCCTTAAGAGTGAGATG		458971	458992
ZC-131R	20	TTATCCTCAGCACCACTACC		25595	25614
ZC-132R	20	TGAGAACGATACCCGCATTG		208206	208225
ZC-133R	22	CATCGATTGCTTCTGGTATGAC		195302	195281
ZC-134R	21	CCCTTGTGGCGTTTAACTCTG		214035	214055
R-ZC-1F	22	ACTATCTACAACACCGCTATCC		165720	165741
R-ZC-2F	22	TAGAGGGTTATTATGGAGAAGG		565687	565708
R-ZC-3F	22	TAGCACTTTGAGATGGAGAAAG		610542	610563
R-ZC-4F	21	GAAGGAATTATCACCGTCAGG		311683	311663
R-ZC-5F	22	TTTGCCGATTCTACTGCTTTAG		610052	610073
R-ZC-6F	22	TAATTTAGCACAATGTCTAGGG		239071	239050
R-ZC-7F	22	GAACAGCAATCAAGCCATATCC		147760	147781
R-ZC-8F	19	GCGGACAGAGAGGGATTCG		357329	357311
R-ZC-9F	22	TAGAAGTTGCCGATGTGTTACC		1058930	1058951
R-ZC-10F	22	TCTACTGCTATTGCATTTTGTC		492798	492819
R-ZC-11F	21	ACAATCTGGGCAAGTAGTACG		57724	57704
R-ZC-12F	22	TCGCAATTTTGAGATTTGTTCC		880025	880004
R-ZC-13F	19	TGGACGAGAGATGCGGAAG		425372	425390
R-ZC-14F	20	AATTCTTCCGCTGCCAATCG		1034984	1035003
R-ZC-15F	19	TCTGAAGGTGTGCGTGTTC		872314	872296
R-ZC-16F	22	AAATGGAGAAGTATCCGTATCG		831479	831500
R-ZC-17F	18	GCCCCTCGAATCATCACC		845591	845574
R-ZC-18F	22	TCAATTAGAGCCAAATCTTGCG		620294	620273
R-ZC-19F	22	CCTCTGTCTCGACGAAATATGG		305204	305225
R-ZC-20F	22	CGATGTGGCGATAAAATTGAGG		222274	222253
R-ZC-21F	18	GCCCGTCAACCGAAAAGC		659431	659414
R-ZC-22F	19	AGGCACTGACAAGCTCTGG		1213226	1213244
R-ZC-23F	22	TGGGTGAGCTAACACAAATAAG		921227	921206
R-ZC-24F	22	TATCCATACCAGAAGGAAGATC		109303	109324
R-ZC-25F	22	TTGTGAAACGAGATGATAGTGG		1076078	1076057
R-ZC-26F	22	TTCTGGATTATCACGAATACCC		426291	426270
R-ZC-27F	22	CTTCTAACGCTATTTGTTGACG		788683	788704
R-ZC-28F	22	GGTATTGTTCATGCCTTTAGGG		737369	737390
R-ZC-29F	22	GCAATGAGTGAAATGGGTTTGG		512563	512584
R-ZC-30F	22	TATGGGCGTATTGTTGTATTGC		986192	986171
R-ZC-31F	22	CTAACATACCGACCAAGAAACG		23431	23452
R-ZC-32F	22	CAGCTATTCCTGCAAAGGTAAC		790598	790577
R-ZC-33F	22	ACTGAATCACCAATTCCAATCC		1182603	1182624
R-ZC-34F	19	TCATCACTGGCATCACTGG		445211	445193
R-ZC-35F	22	AATCATCTGTTCGTCCTTCTCC		942959	942938
R-ZC-36F	22	CCTATGGAGTTTGCTGTAGAAG		696080	696101
R-ZC-37F	17	AAGGGTTGGCGGTCAGG		1113489	1113473
R-ZC-38F	17	ACCAGCGGAAGCGGAAG		708962	708978
R-ZC-39F	19	CGATGAGCCACAACCTGAC		1144864	1144882
R-ZC-40F	22	GCAAAGAAAGAACGCTATAACC		56427	56448
R-ZC-41F	21	GCAATCATAGGGCTTCTTTCC		761786	761766
R-ZC-42F	22	TCTGTAATCTGATGGATCGTAC		1104037	1104016
R-ZC-43F	22	CCGACTGTTTCCTGGAGATTTC		1060541	1060520
R-ZC-44F	20	CCCAACCAAACGGTTATGAG		1190433	1190452
R-ZC-45F	21	TCTGCCATCGTATCAACATCC		1162880	1162900
R-ZC-46F	22	ACAACTGAAGTAGCTGAAGTAG		32972	32993
R-ZC-47F	17	CCTCCGCCTGTTGTTGG		1129018	1129002
R-ZC-48F	21	CCTCTGCTACAACCATTATGC		209801	209821
R-ZC-49F	19	CGCATAGCGTGCTCTACAG		972367	972349
R-ZC-50F	22	ATAATTTGTGCTTGACCATTGG		653675	653696
R-ZC-51F	22	CTCGGTGATATGTCTGAAATGG		718107	718128
R-ZC-52F	20	GGTGAAAGACGTGAAGATCG		1101105	1101124
R-ZC-53F	21	AATGCCCTGCTGAGAATAAAC		42096	42116
R-ZC-54F	22	ATTGCTCAGTCTAATGCTTCTC		1068927	1068906
R-ZC-55F	22	GAGCACGAATAGACTTTTCACG		1155340	1155361
R-ZC-56F	22	TATGGCTCATTCCAATACAACG		47628	47649
R-ZC-57F	20	GCTGCTTGTGATGGAGATGG		760981	761000
R-ZC-58F	22	TAGCAGAAGACTATACTTGTGG		912202	912181
R-ZC-59F	22	TTCCGCAATAATAGAGTTTCCC		960426	960447
R-ZC-60F	21	ACGAACGGCTTGAATATCTGC		221398	221418
R-ZC-61F	22	AGCGGAAAACACATAATAGTAG		985010	985031
R-ZC-62F	20	TGGTCATATCGCCTCTCTCC		654592	654573
R-ZC-63F	21	GAAAGAACTTGAGCGGCAATG		839650	839630
R-ZC-64F	21	GAGCAGCTTCAGATTCTATGG		917125	917105
R-ZC-65F	21	TTCACGAACAACCAAATCTCC		1149870	1149890
R-ZC-66F	22	CGACAAGTGACAAAACAAATGC		493698	493677
R-ZC-67F	20	GAAAGTCATCCGCCTGGTAC		356514	356533
R-ZC-68F	22	ATATAAACCTTCCACCATTCAC		971322	971343
R-ZC-69F	21	ATCTCTTTCCTCGCTGTAGGG		832484	832464
R-ZC-70F	22	AGGTATCATCCCTTTTGTCTGG		644417	644396
R-ZC-71F	21	ACTGAATACAAAGCCCTGTCC		33804	33784
R-ZC-72F	22	AAGTTACTTTTGTGGGAAGAGG		712080	712101
R-ZC-73F	22	GATGCTGTCAGTCACCAATAGG		4248	4227
R-ZC-74F	19	GCGCCTATGGTACTTCATC		311023	311041
R-ZC-75F	22	CGTGTATCCGTCAATAGTTTCG		1128222	1128243
R-ZC-76F	22	TCAAAGCATCAATATCAAGACC		696750	696729
R-ZC-77F	20	TAGCCTGTGGTTTCCATTGC		205581	205600
R-ZC-78F	19	CGCAATTCTCTCCCAGTCC		3177	3195
R-ZC-79F	22	AGTGAGTTGCGTTCAGAATATG		835610	835589
R-ZC-80F	22	TGATCCGTAGATTTCCGAATGG		308189	308210
R-ZC-81F	22	ATCCAGAAAGACAATCAATACG		754441	754462
R-ZC-82F	18	GTATTGAGCGTCGCTTGC		837734	837717
R-ZC-83F	22	CCAACATGCTGTCATTTGTATG		720197	720218
R-ZC-84F	22	AATAGGCTCAATATGCTCTTGG		1167462	1167483
R-ZC-85F	19	TCAGGAGCATGGCAAGAAC		8407	8425
R-ZC-86F	17	TGCGGCTCGGGTAGAAC		189114	189098
R-ZC-87F	22	AGGCTTCATATCACTCTTCTGC		612260	612239
R-ZC-88F	22	ATGCTCATGTCCTATGTATTGG		1165476	1165497
R-ZC-89F	22	TTACATCGAGTTTCGCCAGAAG		1102282	1102261
R-ZC-90F	19	GCCAAGACTATCGCAGGAG		682312	682330
R-ZC-91F	19	CTTCCGTACCACGATCTCC		25230	25248
R-ZC-92F	21	CCATACTCGGTGGTTTATCCC		843986	843966
R-ZC-93F	22	AGTTCCACCGCTCTTAATGAAG		212535	212556
R-ZC-94F	21	CCGTTCCTATCTCAACACAGC		212628	212648
R-ZC-95F	22	GGACAACTATACTTGCCTCTTG		967699	967678
R-ZC-96F	21	TCGGCAGAAGTTAGATGAAGC		1074690	1074670
R-ZC-97F	22	TATTTAATCTCACGGGGCAAAC		871145	871166
R-ZC-98F	22	GCTTAGCAATTACCCAACAACC		210685	210664
R-ZC-100F	22	AGTTGAGTAGAGCTGTTAATCC		1096476	1096497
R-ZC-101F	22	GTGTATGATCCTATCACTCTGC		1112682	1112703
R-ZC-102F	22	TCGATTAAGGAAGAGGTTGAGG		207172	207193
R-ZC-103F	22	ATTTCAACCACATATTCAGGTG		280718	280739
R-ZC-104F	22	TTGGCAGAGAGACAATTAAAGC		1191133	1191112
R-ZC-105F	17	GTCCCGCTTGGCAAACC		213657	213673
R-ZC-106F	22	GAAGTTCTCGGGTCAATAAAAC		194612	194633
R-ZC-107F	21	AAGGTGGAAAGGCGAATGATC		191472	191492
R-ZC-108F	22	ATAGATCAACCTCTGCTTTAGC		941841	941820
R-ZC-109F	18	GTAGCGTCGCTGTATGTG		1258184	1258167
R-ZC-1R	21	CTGTCGATTGAATTGCCAAGG		166100	166080
R-ZC-2R	19	AGCGACTCTGGTTACTTCC		566019	566001
R-ZC-3R	21	CACTTGGTTAATGAGCGATCC		610852	610832
R-ZC-4R	22	CCTCACTTTCTTTAAGGGGATC		311376	311397
R-ZC-5R	22	GTATGTCCATAACCGATAGTCC		610365	610344
R-ZC-6R	22	ATAAGGTTTCATCTTCGGATTC		238772	238793
R-ZC-8R	21	GTAGATGCTCGTGTTGTAGGC		356952	356972
R-ZC-9R	20	AAGAGCGTATCCAGGGATCG		1059253	1059234
R-ZC-10R	22	TGGCCGGTTAAAGGAAATATAG		493117	493096
R-ZC-11R	21	ACGAGCCACAACAAGTATTCC		57415	57435
R-ZC-12R	22	AAGCAGAAGAAGAATGGTTACG		879657	879678
R-ZC-13R	21	GCAACAGCAAAGAAACCATCC		425688	425668
R-ZC-14R	21	GGCTGTAGAGGCTCCTAAAGG		1035289	1035269
R-ZC-15R	22	TTTATGCTGGGCAATTGATACC		871999	872020
R-ZC-16R	20	TCTGGAAGAGGTTGAGATGG		831795	831776
R-ZC-17R	20	AAACATTCATTGGCGTCCTC		845191	845210
R-ZC-18R	22	TCAACTACAGCCGTTAATCTCG		619894	619915
R-ZC-19R	22	CGTACTCAGCATCAATCACAAC		305614	305593
R-ZC-20R	20	TCTGGAGAGGGCAACTGAAC		221850	221869
R-ZC-21R	20	CCTGAACGAGATCCCTGTCC		659105	659124
R-ZC-22R	20	GCCGATTCTGCTGCTTTAGG		929147	929128
R-ZC-23R	22	AGGAGGGCCATTTAATAGAATG		920920	920941
R-ZC-24R	22	ACTAAAAGGCATACTTTGAAGG		109717	109696
R-ZC-25R	21	TATGATTCCTCCGCTCTAACC		1075671	1075691
R-ZC-26R	22	CAATCGGTTTAGTGACTTTCTC		425890	425911
R-ZC-27R	22	GCCTTTTCTTTCTGTCTATTCC		789094	789073
R-ZC-28R	21	AACCGCAACATTATTCTCACG		737794	737774
R-ZC-29R	21	GAAGGAATAGAGGTCGCCATC		512963	512943
R-ZC-30R	20	GTTGCTCGTTGCCTTGATTC		985784	985803
R-ZC-31R	22	ATTGATGGTCCAAATACTGTGC		23832	23811
R-ZC-32R	20	TGCGATGCTCAATCAGTACC		790197	790216
R-ZC-33R	22	TCCAACTATGTTCCTCTTCAAG		1182960	1182939
R-ZC-34R	22	ACAAGTACAAGATAGTGACTGC		444799	444820
R-ZC-35R	20	TCGCATTGGTCCAGTTTTCC		942619	942638
R-ZC-36R	21	AGAATATCTCCAGCCGTTACC		696388	696368
R-ZC-37R	22	TACAGCACGAATCATTGTTACG		1113055	1113076
R-ZC-38R	20	CCACGCTCTCTGTACAATCC		709369	709350
R-ZC-39R	22	TCGTGGATACTTGATGCTTCTG		1145269	1145248
R-ZC-40R	22	GAAGTGTTCGCTAAGAGTATTG		56730	56709
R-ZC-41R	22	AGTTCATAAACATTGGGCTACC		761358	761379
R-ZC-42R	20	ACGAACATAAGCACTCCAAC		1103659	1103678
R-ZC-43R	22	GCAGATCACCTCTTGTCAGATG		1060123	1060144
R-ZC-44R	22	TGCTCTCTACGATTAATCATTG		1190735	1190714
R-ZC-45R	21	TGATTACGCCGTTTACAAAGG		1163303	1163283
R-ZC-46R	22	GCAAGAATAAAAGCCCAAAAGG		33379	33358
R-ZC-47R	20	CGACTCGTGACCTTATCTCC		1128615	1128634
R-ZC-48R	22	CCTTTCTTAGTGAGTTTGATGG		209442	209421
R-ZC-49R	19	CATATCCCCAACCGCAAGC		971960	971978
R-ZC-50R	21	ACCTCGCCATCAGAGATATTC		653978	653958
R-ZC-51R	22	AATGCTGCACTTGATCTAAAGG		718533	718512
R-ZC-52R	22	AATATTGTTGGTCCGAAAATGC		1101409	1101388
R-ZC-53R	22	AGAAAAGGCGTTCTAGTACTTG		42501	42480
R-ZC-54R	21	CACCACACGAATGACTATACG		1068562	1068582
R-ZC-55R	21	GATTGGTTGTTGGGGAGATGG		1155731	1155711
R-ZC-56R	20	GCAAGGGTATGGGTCAGATG		48008	47989
R-ZC-57R	22	GGGAATGATCTGATCCTGTACC		761281	761260
R-ZC-58R	20	CCAAATCCCTGCATTAAACG		911881	911900
R-ZC-59R	22	GTTTCCGAAGATATGGTTGTTG		960792	960771
R-ZC-60R	20	GCTCTCCTTACTCGTGTTGC		221787	221768
R-ZC-61R	22	TAGGGCAAGAGATATCAAGATC		985363	985342
R-ZC-62R	22	TGGTAATCGTGATAGTGCTTCG		654262	654283
R-ZC-63R	22	GAAGAGTTGAACAATGGCATCC		839338	839359
R-ZC-64R	22	CCAACTACCCTTATACCTTTCC		916809	916830
R-ZC-65R	22	AGCATTCTTGCGTAGTAATCAC		1150205	1150184
R-ZC-66R	22	GATGCAAGCTATTGTTATCAGG		493399	493420
R-ZC-67R	22	CGCAATCACTTCACAAGATACG		356825	356804
R-ZC-68R	19	TCTGGCATTATGGCAATCG		971744	971726
R-ZC-69R	21	GGAGTTGCACGTACTGATAGC		832179	832199
R-ZC-70R	21	GATTCGAGCTTGTTCTTCTGG		644082	644102
R-ZC-71R	19	AATCCGTGCCAACTCAAGC		33458	33476
R-ZC-72R	20	CACGATCCAAGGCAATAACG		712411	712392
R-ZC-73R	22	TCACCACGAATACAGGCAATAC		3934	3955
R-ZC-74R	22	ACAATGCAGATATTGGATAGTC		619664	619643
R-ZC-75R	18	CCGGTCGAGGAGAGTTGC		1128525	1128508
R-ZC-76R	21	TGGCTTTTCAATATCCTGTGG		696451	696471
R-ZC-77R	21	CAACAAGCCTCTAGTCGTCTG		205882	205862
R-ZC-78R	22	GCCTCTTTTCTTTCTCTGATCC		3529	3508
R-ZC-79R	22	TGACATGAGCAATCACATATCC		835301	835322
R-ZC-80R	17	CGTGTCCCGCCCTACTC		308505	308489
R-ZC-81R	22	GATCTTCTGAGAATATGGTTGC		754756	754735
R-ZC-82R	22	TAAAGGCGAAATTAAAGAGGTC		837434	837455
R-ZC-83R	22	TCTGTAAACGATGTGTCAAACC		720507	720486
R-ZC-84R	17	GTTGTGGCCGGAGAAGG		1167869	1167853
R-ZC-85R	22	TGAATGGTATGAGAGAGGATGG		8721	8700
R-ZC-86R	22	CTTAGGGAGAGGATAACGAACC		188788	188809
R-ZC-87R	20	AAAGATTTGAGGGGCTTCGC		611957	611976
R-ZC-88R	20	TCCCTGTTGTTTCCATTTGC		1165779	1165760
R-ZC-89R	19	GTTCACCAACCGCTAAGCC		1101982	1102000
R-ZC-90R	22	ATCGTCTTATCCAATCTTTTCG		682635	682614
R-ZC-91R	22	GTCTTTCTGATGATGAAGTTGG		25532	25511
R-ZC-92R	22	ATGGCGATCAGCATATTTACTC		843661	843682
R-ZC-93R	21	GCAAACCTTTAGCCCATGTTG		1253886	1253866
R-ZC-94R	21	TAACCCTCTCATTTGCGGTAC		212936	212916
R-ZC-95R	22	TAGCAGAAAGCATATACCACTG		967395	967416
R-ZC-96R	22	CATCGCAATCGGACTAATAAGC		1074369	1074390
R-ZC-97R	22	TTCGTATTCTTCGCTTCTTTCG		871529	871508
R-ZC-98R	20	AGGCGATAACTCCGTGATGG		210327	210346
R-ZC-99R	21	GTACGTCGCTTTCTCTCTTCC		206286	206306
R-ZC-100R	20	ACGCCAAAGTTGATTGTCTC		1215116	1215097
R-ZC-101R	22	AGGCACTTACAATTTCTGATCG		1112985	1112964
R-ZC-102R	22	CACCGTGGGTATCTTTTAAATC		207471	207450
R-ZC-103R	21	GCACTAAGTGTTCGATTTTCC		281077	281057
R-ZC-104R	21	AGATCCGTTTCGTTTCATTGC		1190803	1190823
R-ZC-105R	21	CTTGTGGATGGTGCAGATAGG		213958	213938
R-ZC-106R	19	CGTTTAGTTCTGCCGAAGC		1233096	1233078
R-ZC-107R	19	TGAGCAAAGACGGCAAAGC		191791	191773
R-ZC-108R	22	CATAGTGGTTGGTCTTTTGGTC		941517	941538
R-ZC-109R	22	TCACCACTTGATCCTATAAACC		1257832	1257853
Y00007R-F	33	TCCTGCTTCTCTACAATAGGTATACAGCTAACG		701033	701001
Y00089R-F	30	AGTGGGAAACCAACCTGAAAACGAGTATTC		310761	310790
Y00277R-F	32	CATTTGCGATGTTGATTCTATTCTCCCTCCAG		1007208	1007177
Y00298R-F	35	TCTAACCAGCCACATATAGTGATAAATATACCTTG		311848	311814
Y00619R-F	30	CGTCTCATCAACCCTCTCATCAATTAGTGG		964063	964092
Y00863R-F	35	TGTAAACTATGTGCTTATATGGTTTCGGAGTGTAG		979462	979496
Y00864R-F	35	TCATAGGCTTAGAAACATTCTTAATCTTCGCATCC		1144784	1144818
Y01079R-F	30	TATTAGCGGGTTGTAATCTAGCGGATGAAC		1239176	1239205
Y01906R-F	32	CTCAAAGAGAGCAAGGGCATAAGAAGAAATTG		613339	613370
Y02008R-F	31	TTGGCGTATTCGACAGGGTTTATAAGTGATC		217320	217290
Y15922R-F	35	AAATTTTCAGAACCTATTGCACCTCCTTTTATTAC		5887	5921
Y15937R-F	35	CATAATGATACCAAATGGATTAATGCTCGTAACTC		1000246	1000280
Y16379R-F	30	CAGTTTGCTAAGGTGAAGATAGGCTTTGAG		1147258	1147229
Y16437R-F	30	AAGAAGCGATATGAGCAAGCCAAGATAAGC		195201	195172
Y16532R-F	30	GTTAAAGGGATGGGAACGGACAAAGAAAGG		181626	181597
Y16805R-F	32	TTGGACTATCGGTTATGGACATACTGGATCTG		610342	610373
Y16957R-F	34	CGTAGTTCCAACTCAAACAGATATTCCGATAAGC		699263	699296
Y17114R-F	30	AAAGGGCTATTTAAGGGTACTCTCAAGTTC		150323	150294
Y17564R-F	31	CGAGATAGAGACAGGGAAGAGGAAGAAACAG		147656	147686
Y16360R-F	35	TCTCAGCGGAATAGATATTGCTATAACAGTAGTAG		1094010	1094044
Y00007R-R	30	GAGTGATTTGGTATCCAAGGTTGGTGATCG		700912	700941
Y00089R-R	31	CTATGGACAATAAGAGCAATCAAGCCAATCG		310906	310876
Y00277R-R	35	TGCTTATGCTAGAATGACATTCACAACACCATATC		1007097	1007131
Y00298R-R	33	TCTCACAAGAGTTGCTTTATATTGGTCTAATGC		311740	311772
Y00619R-R	33	TCATCGTGAATATTGAGGCTACTTTTGGAAATG		964208	964176
Y00863R-R	31	TACTAATACGTGGTCGGAGTGGAGAGATTCG		979573	979543
Y00864R-R	31	ACTTAGATAATTGTCAGGTTGTGGCTCATCG		1144894	1144864
Y01079R-R	35	TGATCTACCTTACTTTGTAGCTCTTGTTGTTCTTG		1239293	1239259
Y01906R-R	32	CCCACACTATCATAACCCCTACAACAAAATCC		613487	613456
Y02008R-R	33	AGACAACAAAGTCTACTATGAGTCTTGTGATGC		217216	217248
Y15922R-R	33	GCATGGCATTCTAAGTGTTTGGTATCTCAAAAC		5986	5954
Y15937R-R	32	CGGAGAGAGGATTCGTCGTCAATTATATTTTG		1000376	1000345
Y16057R-R	31	AGGTATATCCATCTCGGTCCTCTCGTACTAG		310679	310656
Y16379R-R	31	AAGGACCAGAAGAAAGCATACTCTCAATACC		1147111	1147141
Y16437R-R	35	CGCCTCTTAAACGATACTGGATATTTCTTCTCTTC		195080	195114
Y16532R-R	35	TTACACCCTCCTTAGTCATCTCATCTCTGAAATAG		181515	181549
Y16805R-R	35	GCATGAATAAGAATCGGAGAAACGGTAAATACTTG		610475	610441
Y16957R-R	30	GGATACCAGGAGGAAAAGGAGAAGTAGGAC		699381	699352
Y17114R-R	35	AAATAAACACAGTATTCTTCCCGTAACTTTTAAGG		150180	150214
Y17564R-R	30	CTGTTCTCATTTCTGTGGTGGGATTGTTGG		147765	147736
Y16360R-R	34	ATGGGATGCTATCATCAAATGATTTCTAGATTGC		1094169	1094136
Y00007L-F	35	AAAAGAACGACGAGGATAGAGAAATTTATTTTCAG		940600	940566
Y00089L-F	33	AGAAGGGGAAAGATTTATTGGAGAGAGATGAGC		306151	306183
Y00277L-F	35	GACAGTTGAATCAATGCTTGGGAGATTAAATAGAG		1073779	1073745
Y00298L-F	32	ACATAGATAGACACATCAAACGACGCCTATTG		330846	330815
Y00619L-F	32	AAAGTTGTTTTAAAATACACATGCTCAGTACG		942104	942135
Y00863L-F	30	TATCGGCATAGCACTCACTTCTTGCGGTTC		965101	965130
Y00864L-F	30	TGCAATGCTATCAACAGCCGTTTCCTTAGG		1095869	1095898
Y01079L-F	31	ATGGTAGATTGTTTAGCCTTGCTCAACTTCG		1233278	1233308
Y01906L-F	30	CCGCTGAGCTACCAGGGAAAATGATAAACC		612481	612510
Y02008L-F	30	CAATGGTAAAAGATCACGCTGCACTCCTTC		305193	305164
Y15922L-F	32	ACAACCATATCAGGAGTATCCCACAAAGAAAC		15	46
Y15937L-F	32	AAGAAGAGAAGCCAAGGATACAAGCGATAATC		981319	981350
Y16057L-F	30	CCATCCTCCAAGCCTAAATACTCCTTAACG		308537	308554
Y16360L-F	34	GCGAAGAACGAATCTTAGCAAAACATTTGAATCC		1076097	1076130
Y16379L-F	35	GAAAACATAGTAGAATCCTTGCTTCTGGTTATAAG		1213347	1213313
Y16437L-F	34	CTAGATGGATGACTTCAATACTGTTGTCTTCTTC		198498	198465
Y16532L-F	30	ACGAGTGATATTGAGGTTGGGGTTTATGGG		183610	183581
Y16805L-F	33	TTGTTGCAGAAGTATGTTCCGTTTTAAAAGAGG		332118	332150
Y16957L-F	35	AAGAGCGATTAATATGTATCAAAAGATGAAAGTGC		620301	620335
Y17114L-F	35	GTCTAGGCAGATAGGGACTTAATTTATTCCATACG		176454	176420
Y17564L-F	35	GTAAAATCACTCCAACCACGTCAGAAAATATCAAC		7159	7193
Y00007L-R	35	AGCGTATATTTAATCACATTACGACAATATCTCTC		940487	940521
Y00089L-R	31	ATCGTCCTCTCAGACCAGCTATAGATCGTAG		1006061	1006091
Y00277L-R	30	CCCTACGAACACTAACCACTTTCTCAGAAG		1073679	1073708
Y00298L-R	32	ATGGATTGCATGTATTCTTTGGGCTTATTTGG		330736	330767
Y00619L-R	34	AGTGGAACTTGAACAACAATAATACTCGAAATAG		942241	942208
Y00863L-R	35	CAGGTGATAGAGGTTGGTTAGAAGAGGAAGATTGC		965249	965215
Y00864L-R	30	TTAGCTGCCGATTCTGCTGCTTTAGGTTTC		929153	929124
Y01079L-R	31	AGCATACAATAGATTTGAAGCCCGTGTTAGC		1233422	1233392
Y01906L-R	35	CACTGTCATGTAATTCTTGCAATTGTCGTGTAATG		612597	612563
Y02008L-R	33	CAGAGAAAGCATTCAGATGGTTGAGCATTATGG		305061	305093
Y15922L-R	31	AAATAAGTGAGATTTGTGTTGATCGGACAGC		114	84
Y15937L-R	35	TTTCAAGCCAACAACTTACATAATAAAGAGGTACG		981441	981407
Y16360L-R	30	AGAGTAATTGTCGGACCAAGAGAGGCTTTG		1076232	1076203
Y16379L-R	33	GGCACTGACAAGCTCTGGAGATTTAAAATTATC		1213227	1213259
Y16437L-R	33	TAGCGGATGAACCAAAGAATAACATTGTTGATG		198349	198381
Y16532L-R	34	GCCTTTATGCTTGATAACTAACTCAGGAAGATGC		183467	183500
Y16805L-R	34	TCGCCACCCTATATAACAAAAGTGCATATTATCC		332250	332217
Y16957L-R	34	GCACGTACTCCACCATTTCCAAATAAATCATATC		620426	620393
Y17114L-R	35	AGATAACGAAGAATACAACAAAAGAGCTGATGAAG		176336	176370
Y17564L-R	30	TTCTCTGTATCCTGATCCTCCCAACCTTCC		7270	7241
contig16938L-F	30	AACTACCGTCTATCGCAATGAACACTATGG		215182	215211
contig00271L-R	27	CCTCAGCGGAAAACAGCACTTTAACCC		213189	213163
contig00288L-R	33	AATCAGGTTCATTAAGGTGCTTTTACCACTTCC		204048	204080
contig01912L-R	33	AGGACTTCAAATCTCAAAACACACTGGAAAAGG		1251052	1251084
contig04560L-R	26	AAAGCGTGGGGAGCAAACAGGATTAG		306693	306718
contig16938L-R	26	ATCCAGCCCGTCAGGAGTCAGAATAG		215290	215265
contig16939L-R	30	GGCTTCGGCGTTAATGACGTATTGATTACC		204006	204035
contig17645L-R	23	ATCCTTTGGTGCGGCTCGGGTAG		189123	189101
contig17910L-R	25	TTGAGAGCGGGTAAGTGGGAAGAGC		205521	205497
contig00271R-F	23	ACACTCATCGGGTCGGTGCTCAC		213804	213826
contig02522R-F	27	CCAAAGAGTAACGGAGGAGCACGAAGG		310270	310284
contig00288R-F	31	TCAACGAGAACAGTTACCCTTAATCTAAAGC		203405	203375
contig01912R-F	32	GTCTTCATCCACAACAGTACGAATCCTATTGC		209520	209489
contig16062R-F	30	TATCTCTTCCTTAGACAGCTTAGCCCAACG		184693	184722
contig16938R-F	26	TAATGCGGGTGCTAGTCCACATGAAC		216584	216609
contig17642R-F	30	AACATTTGAATTTACGGCTGAGCAGATTGG		192240	192211
contig17645R-F	33	GTGTTATTGATCTAATAAGGCTTGCTGGTTTGC		190070	190102
contig17910R-F	30	TGCGTGAAAGTGAGTTGAAGATGAGTGTAC		207531	207560
contig17779R-F	25	GTATCGAAAGCAGGCAACCCAGAGC		200789	200813
contig16062R-R	25	GAATATCGCAAGACGGGAGCAACGG		184765	184747
contig17642R-R	35	TGAATGATCTTAAACTTGTCAGGTTCTTTCTTCTC		192127	192161
contig17910R-R	30	CGTCCTTAGCTCTAATCGCCTCTTTAATCG		207593	207564
contig00275L-F	27	AATAACCGCCTATCTTCGTCGCAATCC		1252737	1252763
contig00275L-R	30	TCCGAGATGCACCAAAGAATTGTAATGTCC		1252851	1252822
contig00275R-F	30	AACACAGCCACCGCACAGATAATGAGAGAG		212641	212670
contig00275R-R	30	GAGAACGATGTCATAACCCGCCTTTGTAGC		1253780	1253751
contig00617L-F	29	TGGATTGATGGTGTGAACGCCTTAATACG		176683	176655
contig00617L-R	26	CGAACAGGGTTAAGACGGCTAAAGGG		176548	176573
contig15592L-F	32	GCCATCATCTACGCACTCTATAATCTCAAAGC		1214958	1214927
contig15592L-R	31	AAAACTGAGGGAACAAAACGAAGAGCAAATC		1214850	1214880
contig15592R-F	30	GTAGTCGCTGCCAGGGAGTTAATTTGGAAC		1214370	1214341
contig15592R-R	35	AGAAGGGCTAGAAGCTGAACGTAATAAATATACAG		1214222	1214256
contig15942L-F	28	AATAACCGCCTATCGTCATCTCAATCCG		211741	211768
contig15942L-R	30	TCCATAAAACTGTAGTGTTCCCCGTAATCG		211845	211816
contig15942R-F	30	ATAATGAGAGAGCGAACATACGGCGGAAAG		212659	212688
contig15942R-R	31	TCATCGTGAACGGTGAGAACAATGTCATAAC		212792	212762
contig17779R-R	29	TCCCTCCCTAAGGAAGAAAGCAACATACC		200867	200839
contig17643R-F	35	CCTTAAATATCTTAGGGTCGGGATTATCAACATTG		194390	194424
contig17056L-R	32	TTAAGCTGGATTTGGATCGTCTGGATCATTAG		207975	207944
contig16565R-F	31	AGAAGAAGATGGTGTATGTGGAGGTTACTGG		188236	188206
ContigI-L-R	28	GCTTCAATCTTGGCGTTGTGTACTTCTT		214152	214125
ContigI-R-F	35	CCACATACTTCAATACCAATCTTCTCCTAATTATC		5217	5251
ContigII-L-R	26	CGTTTGTGGTTGGTTGAGGAGAAGGG		150849	150824
ContigIX-R-F	31	GATAACGAACCCTCCCTTGATCTTCAGAGAC		188799	188829
ContigIII-L-R	35	GTGTTGAGGTTAGAGATGGCTAATGGATGAATATC		218023	217989
ContigIII-R	36	AGCCATTGATTTAACTGTTATATTTTATTCCTTATT		610783	610818
ContigIV-L-R	29	CATGACATACAAGACAAGATTCTGAGTGC		966233	966205
ContigIV-R-F	35	CCTAATCTTAGTATCTTGGATAATTGTACCCTTGG		978884	978918
ContigV-L-R	37	CTGTATTACCATCCAGAAATAACAAGTAATTATGTTT		963578	963614
ContigV-R-F	27	CGGATAACCCAGCAGAAATCAAGCAAA		147111	147137
ContigVII-L-R	29	CTGAAGAAGCAAGAGTaAGCCGAAGAAGC		1213713	1213741
ContigVII-R-F	30	GGTTACTGACAACATCGCTATCGTAGAGGC		981218	981189
ContigVIII-L-R	32	GCATTACACGATTACCTGTAGGACTTATTCGG		194127	194096
ContigVIII-R-F	29	GTATGTTGCTTTCTTCCTTAGGGAGGGAG		200840	200868
ContigX-L-R	29	CTGTAATTGGGCGTTGTTGAAGTTAGGGC		188995	188967
ContigX-R-F	35	CATTCTTAAACGTGTAGTTAACATGGCTAAATCTC		1237946	1237980
ContigXI-L-R	34	ACGGGAAATTGCTACTTTCTATTGCTTCTTCAAT		211957	211924
ContigXII-L-R	34	CACACCAGAATCTAACCCTCGTATCAACCTTTCG		1252955	1252922
I5-2R-R	35	CTTGTTGAAGGGTGTCTTTAGAAGAAGTATAACCT		979775	979741
I5-2FR2	37	GATAGACATTACTAATGTGCTCCTATACATCATATCA		1097930	1097959
ZC-F3R3-L-2	21	GAGAGATGTTTTAGCATTAGG		305929	305949
ZC-F3R3-R-2	23	GCGGTTATCCATTCCGTATTTAG		619083	619061
ZC-R1R2-L-2	34	TTTGGTATGGAAGGACCATAAATATCTGCATCGA		619988	619955
ZC-R1R2-R-2	21	ATAACATCACGACAAGCCCCT		624495	624515
I4-2F-3	22	ATCATTGTGAGCTGCAACTATC		221049	221070
I4-2R-3	20	GATTGGACTACTTTAACGTC		224753	224734
T17-3-6F-2	24	CATAGATCTTATATAACTCTATGC		1223803	1223818
T17-3-6R-2	20	TAGGCTGTGTTTTTCTGGGT		187467	187448
I4-2R-Forward	30	AGTTCCTTCTATGGATCGAATTTTCAGTGG		225627	225598
I4-2R-inversed	30	CCACTGAAAATTCGATCCATAGAAGGAACT		225598	225627
I4-2F-Forward	26	GAACCTGTGACCCTTGGAATCGGAAT		175464	175439
I5-2F-Forward	25	CTTCTAAGCAGGATGTCGCAGGTTC		979987	980011
I7-2-2R-Forward	28	CATCCTTAAACAGGTTTGACATCAGAAA		148374	148401
I7-2-2R-inversed	28	TTTCTGATGTCAAACCTGTTTAAGGATG		148401	148374
ZC-F1F2-L-3	24	CTTATTATTGCAGCTAACCTCCTC		312422	312402
ZC-rrn-F3	33	TGAGAACTCCAGAAGTGACTCCAGCAAAGAATG		1006861	1006829
ZC-rrn-R3	33	AAACGCCAAATAACTGGTGAAGCAAACATCCTC		1000123	1000155
ZC-rrn-R1	30	TTTTGTAGAAGGTAAGGAGGGATGTCTTGG		613551	613580
ZC-rrn-R2	35	TGCGGAGTAGAAACAATCACAACACCAGAAAGAGG		620276	620242
ZC-rrn-F1	35	ATTAGACCAATATAAAGCAACTCTTGTGAGATACC		311770	311736
ZC-rrn-F2	35	TGATATAGGGGCTCGTCGTTTACAGACAGTGATGG		305505	305539
ZC-F3R3-L-3	18	CAAGCGGTGGAGCATGTG		306862	306879
ZC-F3R3-R-3	18	GACTTCGCAGAGCCCTGT		309819	309802
ZC-F1F2-R-3	18	CGATCAGCCACACTGGGA		306254	306271
ZC-R1R2-L-3	25	CTTAAAGATAAATCAGAACGCAACG		628149	628126
ZC-R1R2-R-3	28	CATTGGAATAATATCTCAAGATATAAAA		625402	625429
S18-3L-R-W	30	TCAACTCCGTAAACATTTTGTGGAATAGCT		208679	208650
S18-3L-R	30	GTCCTCATCAACTCCGTAAACATTTTGTGG		208686	208657
S18-4L-R-W	30	TCAACTCCGTAATGTTCTAACGTAATAGAC		1249551	1249522
S18-4L-R	30	GTCCTCATCAACTCCGTAATGTTCTAACGT		1249558	1249529
S18-3-1912L1	26	CTAATGAATAACATAAACATAATACC		209449	209474
S18-3-1912L2	22	TGTAGCGAAAGATATAGCGGAA		198692	198713
S18-3-1912R	20	AGGCTGGGTAAGAGAGACGC		210301	210282
152502ZC-F	18	TGTCGTTCTCGCCCATTG		152761	152778
296949ZC-F	21	GCCAAGGGATGTTTAATGAGC		295583	295603
510650ZC-F	21	CTGCTGGCATAACAACAAATG		509223	509243
860444ZC-F	20	GCAAGCGACTGTAGTTCTTC		859846	859865
1078561ZC-F	20	CCAGGCACATCTTCATTGAC		1077344	1077363
152502ZC-R	22	CTCCACCTAGACTAATCCACTC		153101	153080
296949ZC-R	22	GCAAATAACGAACGAGAAGAGG		295860	295839
510650ZC-R	18	CAACCGCCGCTCTCATAG		509479	509462
860444ZC-R	21	CTTCATGCGTTCAGTAGGATC		860103	860083
1078561ZC-R	18	TGTACGCCGCATTTAGGG		1077730	1077713
Primers used for gap close
Primer Name	base pair	Sequences (5' ----------3')		Genome location
contig15592L-W2	32	GCTTTGAGATTATAGAGTGCGTAGATGATGGC		1214927	1214958
Y01079L-W2	31	CGAAGTTGAGCAAGGCTAAACAATCTACCAT		1233308	1233278
Y01079R-W2	35	CAAGAACAACAAGAGCTACAAAGTAAGGTAGATCA		1239259	1239293
Y15922L-W2	32	GTTTCTTTGTGGGATACTCCTGATATGGTTGT		46	15
Y15922R-W2	33	GTTTTGAGATACCAAACACTTAGAATGCCATGC		5954	5986
Y17564L-W2	35	GTTGATATTTTCTGACGTGGTTGGAGTGATTTTAC		7193	7159
Y17564R-W2	30	CCAACAATCCCACCACAGAAATGAGAACAG		147736	147765
Y17114R-W2	35	CCTTAAAAGTTACGGGAAGAATACTGTGTTTATTT		150214	150180
Y17114L-W2	35	CGTATGGAATAAATTAAGTCCCTATCTGCCTAGAC		176420	176454
Y16437R-W2	35	GAAGAGAAGAAATATCCAGTATCGTTTAAGAGGCG		195114	195080
Y16437L-W2	34	GAAGAAGACAACAGTATTGAAGTCATCCATCTAG		198465	198498
Y02008R-W2	33	GCATCACAAGACTCATAGTAGACTTTGTTGTCT		217248	217216
Y00298L-W2	32	CAATAGGCGTCGTTTGATGTGTCTATCTATGT		330815	330846
Y16805L-W2	33	CCTCTTTTAAAACGGAACATACTTCTGCAACAA		332150	332118
Y16805R-W2	35	CAAGTATTTACCGTTTCTCCGATTCTTATTCATGC		610441	610475
Y01906L-W2	30	GGTTTATCATTTTCCCTGGTAGCTCAGCGG		612510	612481
Y16957R-W2	30	GTCCTACTTCTCCTTTTCCTCCTGGTATCC		699352	699381
Y00007R-W2	30	CGATCACCAACCTTGGATACCAAATCACTC		700941	700912
Y00007L-W2	35	CTGAAAATAAATTTCTCTATCCTCGTCGTTCTTTT		940566	940600
Y00619L-W2	32	CGTACTGAGCATGTGTATTTTAAAACAACTTT		942135	942104
Y00619R-W2	33	CATTTCCAAAAGTAGCCTCAATATTCACGATGA		964176	964208
Y00863L-W2	30	GAACCGCAAGAAGTGAGTGCTATGCCGATA		965130	965101
Y00863R-W2	31	CGAATCTCTCCACTCCGACCACGTATTAGTA		979543	979573
Y15937L-W2	32	GATTATCGCTTGTATCCTTGGCTTCTCTTCTT		981350	981319
Y00277L-W2	35	CTCTATTTAATCTCCCAAGCATTGATTCAACTGTC		1073745	1073779
Y16360L-W2	34	GGATTCAAATGTTTTGCTAAGATTCGTTCTTCGC		1076130	1076097
Y16360R-W2	34	GCAATCTAGAAATCATTTGATGATAGCATCCCAT		1094136	1094169
Y00864L-W2	30	CCTAAGGAAACGGCTGTTGATAGCATTGCA		1095898	1095869
Y00864R-W2	31	CGATGAGCCACAACCTGACAATTATCTAAGT		1144864	1144894
Y16379R-W2	31	GGTATTGAGAGTATGCTTTCTTCTGGTCCTT		1147141	1147111
Y16379L-W2	35	CTTATAACCAGAAGCAAGGATTCTACTATGTTTTC		1213313	1213347
contig0091L-R	28	AGCCAATGCCAAATTAGCCAAGGAAGTC		177384	177357
