# Supplementary material for: The Complete Genome Sequence of ‘Candidatus Liberibacter solanacearum’, the Bacterium Associated with Potato Zebra Chip Disease
Source: PLoS One. 2011 Apr 28;6(4):e19135. doi: 10.1371/journal.pone.0019135 (PMC3084294; doi:10.1371/journal.pone.0019135)
Supplement: Table S2 — Primers used for genomic walking. (XLSX) [file pone.0019135.s010.xlsx]

## Sheet: 138GWPrimerssplit_Vs-Lso_E-1-BL
Table-S2 Primers used for genomic walking
Primer Name	base pair	Sequences (5' ----------3')	Genome location
Y00007L-R	35	AGCGTATATTTAATCACATTACGACAATATCTCTC	940487	940521
Y00007L-W2	35	CTGAAAATAAATTTCTCTATCCTCGTCGTTCTTTT	940566	940600
Y00089L-R	31	ATCGTCCTCTCAGACCAGCTATAGATCGTAG	1006061	1006091
Y00089L-W2	33	GCTCATCTCTCTCCAATAAATCTTTCCCCTTCT	306183	306151
Y00277L-R	30	CCCTACGAACACTAACCACTTTCTCAGAAG	1073679	1073708
Y00277L-W2	35	CTCTATTTAATCTCCCAAGCATTGATTCAACTGTC	1073745	1073779
Y00298L-R	32	ATGGATTGCATGTATTCTTTGGGCTTATTTGG	330736	330767
Y00298L-W2	32	CAATAGGCGTCGTTTGATGTGTCTATCTATGT	330815	330846
Y00619L-R	34	AGTGGAACTTGAACAACAATAATACTCGAAATAG	942241	942208
Y00619L-W2	32	CGTACTGAGCATGTGTATTTTAAAACAACTTT	942135	942104
Y00863L-R	35	CAGGTGATAGAGGTTGGTTAGAAGAGGAAGATTGC	965249	965215
Y00863L-W2	30	GAACCGCAAGAAGTGAGTGCTATGCCGATA	965130	965101
Y00864L-R	30	TTAGCTGCCGATTCTGCTGCTTTAGGTTTC	929153	929124
Y00864L-W2	30	CCTAAGGAAACGGCTGTTGATAGCATTGCA	1095898	1095869
Y01079L-R	31	AGCATACAATAGATTTGAAGCCCGTGTTAGC	1233422	1233392
Y01079L-W2	31	CGAAGTTGAGCAAGGCTAAACAATCTACCAT	1233308	1233278
Y01906L-R	35	CACTGTCATGTAATTCTTGCAATTGTCGTGTAATG	612597	612563
Y01906L-W2	30	GGTTTATCATTTTCCCTGGTAGCTCAGCGG	612510	612481
Y02008L-R	33	CAGAGAAAGCATTCAGATGGTTGAGCATTATGG	305061	305093
Y02008L-W2	30	GAAGGAGTGCAGCGTGATCTTTTACCATTG	305164	305193
Y15922L-R	31	AAATAAGTGAGATTTGTGTTGATCGGACAGC	114	84
Y15922L-W2	32	GTTTCTTTGTGGGATACTCCTGATATGGTTGT	46	15
Y15937L-R	35	TTTCAAGCCAACAACTTACATAATAAAGAGGTACG	981441	981407
Y15937L-W2	32	GATTATCGCTTGTATCCTTGGCTTCTCTTCTT	981350	981319
Y16360L-R	30	AGAGTAATTGTCGGACCAAGAGAGGCTTTG	1076232	1076203
Y16360L-W2	34	GGATTCAAATGTTTTGCTAAGATTCGTTCTTCGC	1076130	1076097
Y16379L-R	33	GGCACTGACAAGCTCTGGAGATTTAAAATTATC	1213227	1213259
Y16379L-W2	35	CTTATAACCAGAAGCAAGGATTCTACTATGTTTTC	1213313	1213347
Y16437L-R	33	TAGCGGATGAACCAAAGAATAACATTGTTGATG	198349	198381
Y16437L-W2	34	GAAGAAGACAACAGTATTGAAGTCATCCATCTAG	198465	198498
Y16532L-R	34	GCCTTTATGCTTGATAACTAACTCAGGAAGATGC	183467	183500
Y16532L-W2	30	CCCATAAACCCCAACCTCAATATCACTCGT	183581	183610
Y16805L-R	34	TCGCCACCCTATATAACAAAAGTGCATATTATCC	332250	332217
Y16805L-W2	33	CCTCTTTTAAAACGGAACATACTTCTGCAACAA	332150	332118
Y16957L-R	34	GCACGTACTCCACCATTTCCAAATAAATCATATC	620426	620393
Y16957L-W2	35	GCACTTTCATCTTTTGATACATATTAATCGCTCTT	620335	620301
Y17114L-R	35	AGATAACGAAGAATACAACAAAAGAGCTGATGAAG	176336	176370
Y17114L-W2	35	CGTATGGAATAAATTAAGTCCCTATCTGCCTAGAC	176420	176454
Y17564L-R	30	TTCTCTGTATCCTGATCCTCCCAACCTTCC	7270	7241
Y17564L-W2	35	GTTGATATTTTCTGACGTGGTTGGAGTGATTTTAC	7193	7159
contig00275L-R	30	TCCGAGATGCACCAAAGAATTGTAATGTCC	1252851	1252822
contig00275L-W2	27	GGATTGCGACGAAGATAGGCGGTTATT	1252763	1252737
contig00617L-R	26	CGAACAGGGTTAAGACGGCTAAAGGG	176548	176573
contig00617L-W2	29	CGTATTAAGGCGTTCACACCATCAATCCA	176655	176683
contig15592L-R	31	AAAACTGAGGGAACAAAACGAAGAGCAAATC	1214850	1214880
contig15592L-W2	32	GCTTTGAGATTATAGAGTGCGTAGATGATGGC	1214927	1214958
contig15942L-R	30	TCCATAAAACTGTAGTGTTCCCCGTAATCG	211845	211816
contig15942L-W2	28	CGGATTGAGATGACGATAGGCGGTTATT	211768	211741
contig00271L-R	27	CCTCAGCGGAAAACAGCACTTTAACCC	213189	213163
contig00271L-W2	34	GGAGTAGTTCTTCTATTTCTATTTTCTGCTGGGG	213150	213117
contig00288L-R	33	AATCAGGTTCATTAAGGTGCTTTTACCACTTCC	204048	204080
contig00288L-W2	27	CCTAATAACGCCATGCCAACACAACGG	204124	204150
contig01912L-R	33	AGGACTTCAAATCTCAAAACACACTGGAAAAGG	1251052	1251084
contig01912L-W2	28	CGAAGAGTTAGGCGGGAAGATGTGTGAT	210111	210138
contig16938L-R	26	ATCCAGCCCGTCAGGAGTCAGAATAG	215290	215265
contig16938L-W2	30	CCATAGTGTTCATTGCGATAGACGGTAGTT	215211	215182
contig16939L-R	30	GGCTTCGGCGTTAATGACGTATTGATTACC	204006	204035
contig16939L-W2	26	CCTAACAACGCCATGCCAACACAACG	1244995	1245020
contig17645L-R	23	ATCCTTTGGTGCGGCTCGGGTAG	189123	189101
contig17645L-W2	32	GCTTAACCTAGATGACTGAGTGTGAGATCTGT	189023	188992
contig17910L-R	25	TTGAGAGCGGGTAAGTGGGAAGAGC	205521	205497
contig17910L-W2	26	GGCTTGTATGTGGTGTAGGCGAACAG	205448	205423
contig00862L-R	34	CGCTTTAAGGAAATGTGTAGATGCTGAAGATTGG	980275	980242
contig00862L-W2	28	GGTATTGAGGGGAGAGGTTGAAGCAGAG	980179	980152
contig16565L-R	31	GATAACGAACCCTCCCTTGATCTTCAGAGAC	188799	188829
contig16565L-W2	29	GCAAAGGAACGCAGTAAACTACGGTGAAT	188870	188898
contig17643L-R	32	TTGGGATTGACTCAAAGCATTACACGATTACC	194143	194112
contig17643L-W2	32	GTAGGGCATCATAACACTTACGGAATGGCTAT	194075	194044
Y00007R-F	33	TCCTGCTTCTCTACAATAGGTATACAGCTAACG	701033	701001
Y00007R-W2	30	CGATCACCAACCTTGGATACCAAATCACTC	700941	700912
Y00089R-F	30	AGTGGGAAACCAACCTGAAAACGAGTATTC	310761	310790
Y00089R-W2	31	CGATTGGCTTGATTGCTCTTATTGTCCATAG	310876	310906
Y00277R-F	32	CATTTGCGATGTTGATTCTATTCTCCCTCCAG	1007208	1007177
Y00277R-W2	35	GATATGGTGTTGTGAATGTCATTCTAGCATAAGCA	1007131	1007097
Y00298R-F	35	TCTAACCAGCCACATATAGTGATAAATATACCTTG	311848	311814
Y00298R-W2	33	GCATTAGACCAATATAAAGCAACTCTTGTGAGA	311772	311740
Y00619R-F	30	CGTCTCATCAACCCTCTCATCAATTAGTGG	964063	964092
Y00619R-W2	33	CATTTCCAAAAGTAGCCTCAATATTCACGATGA	964176	964208
Y00863R-F	35	TGTAAACTATGTGCTTATATGGTTTCGGAGTGTAG	979462	979496
Y00863R-W2	31	CGAATCTCTCCACTCCGACCACGTATTAGTA	979543	979573
Y00864R-F	35	TCATAGGCTTAGAAACATTCTTAATCTTCGCATCC	1144784	1144818
Y00864R-W2	31	CGATGAGCCACAACCTGACAATTATCTAAGT	1144864	1144894
Y01079R-F	30	TATTAGCGGGTTGTAATCTAGCGGATGAAC	1239176	1239205
Y01079R-W2	35	CAAGAACAACAAGAGCTACAAAGTAAGGTAGATCA	1239259	1239293
Y01906R-F	32	CTCAAAGAGAGCAAGGGCATAAGAAGAAATTG	613339	613370
Y01906R-W2	32	GGATTTTGTTGTAGGGGTTATGATAGTGTGGG	613456	613487
Y02008R-F	31	TTGGCGTATTCGACAGGGTTTATAAGTGATC	217320	217290
Y02008R-W2	33	GCATCACAAGACTCATAGTAGACTTTGTTGTCT	217248	217216
Y15922R-F	35	AAATTTTCAGAACCTATTGCACCTCCTTTTATTAC	5887	5921
Y15922R-W2	33	GTTTTGAGATACCAAACACTTAGAATGCCATGC	5954	5986
Y15937R-F	35	CATAATGATACCAAATGGATTAATGCTCGTAACTC	1000246	1000280
Y15937R-W2	32	CAAAATATAATTGACGACGAATCCTCTCTCCG	1000345	1000376
Y16379R-F	30	CAGTTTGCTAAGGTGAAGATAGGCTTTGAG	1147258	1147229
Y16379R-W2	31	GGTATTGAGAGTATGCTTTCTTCTGGTCCTT	1147141	1147111
Y16437R-F	30	AAGAAGCGATATGAGCAAGCCAAGATAAGC	195201	195172
Y16437R-W2	35	GAAGAGAAGAAATATCCAGTATCGTTTAAGAGGCG	195114	195080
Y16532R-F	30	GTTAAAGGGATGGGAACGGACAAAGAAAGG	181626	181597
Y16532R-W2	35	CTATTTCAGAGATGAGATGACTAAGGAGGGTGTAA	181549	181515
Y16805R-F	32	TTGGACTATCGGTTATGGACATACTGGATCTG	610342	610373
Y16805R-W2	35	CAAGTATTTACCGTTTCTCCGATTCTTATTCATGC	610441	610475
Y16957R-F	34	CGTAGTTCCAACTCAAACAGATATTCCGATAAGC	699263	699296
Y16957R-W2	30	GTCCTACTTCTCCTTTTCCTCCTGGTATCC	699352	699381
Y17114R-F	30	AAAGGGCTATTTAAGGGTACTCTCAAGTTC	150323	150294
Y17114R-W2	35	CCTTAAAAGTTACGGGAAGAATACTGTGTTTATTT	150214	150180
Y17564R-F	31	CGAGATAGAGACAGGGAAGAGGAAGAAACAG	147656	147686
Y17564R-W2	30	CCAACAATCCCACCACAGAAATGAGAACAG	147736	147765
Y16360R-F	35	TCTCAGCGGAATAGATATTGCTATAACAGTAGTAG	1094010	1094044
Y16360R-W2	34	GCAATCTAGAAATCATTTGATGATAGCATCCCAT	1094136	1094169
contig00275R-F	30	AACACAGCCACCGCACAGATAATGAGAGAG	212641	212670
contig00275R-W2	30	GCTACAAAGGCGGGTTATGACATCGTTCTC	1253751	1253780
contig15592R-F	30	GTAGTCGCTGCCAGGGAGTTAATTTGGAAC	1214370	1214341
contig15592R-W2	35	CTGTATATTTATTACGTTCAGCTTCTAGCCCTTCT	1214256	1214222
contig15942R-F	30	ATAATGAGAGAGCGAACATACGGCGGAAAG	212659	212688
contig15942R-W2	31	GTTATGACATTGTTCTCACCGTTCACGATGA	212762	212792
contig00271R-F	23	ACACTCATCGGGTCGGTGCTCAC	213804	213826
contig00271R-W2	35	CGATTATCACGATATTAGTAAACCTATCTGCACCA	213916	213950
contig00288R-F	31	TCAACGAGAACAGTTACCCTTAATCTAAAGC	203405	203375
contig00288R-W2	32	GGACAAATCAAGTTCGGATAGAGGGAAATATC	203346	203315
contig01912R-F	32	GTCTTCATCCACAACAGTACGAATCCTATTGC	209520	209489
contig01912R-W2	34	CATAGTAAACCCCTTTCTTAGTCTAATGAGGCGA	1250446	1250413
contig16062R-F	30	TATCTCTTCCTTAGACAGCTTAGCCCAACG	184693	184722
contig16062R-W2	25	CCGTTGCTCCCGTCTTGCGATATTC	184747	184765
contig17642R-F	30	AACATTTGAATTTACGGCTGAGCAGATTGG	192240	192211
contig17642R-W2	35	GAGAAGAAAGAACCTGACAAGTTTAAGATCATTCA	192161	192127
contig17645R-F	33	GTGTTATTGATCTAATAAGGCTTGCTGGTTTGC	190070	190102
contig17645R-W2	31	GTATCGCCCGCTTTACGCTTCTCTATAAATT	190131	190161
contig17779R-F	25	GTATCGAAAGCAGGCAACCCAGAGC	200789	200813
contig17779R-W2	29	GGTATGTTGCTTTCTTCCTTAGGGAGGGA	200839	200867
contig17910R-F	30	TGCGTGAAAGTGAGTTGAAGATGAGTGTAC	207531	207560
contig17910R-W2	30	CGATTAAAGAGGCGATTAGAGCTAAGGACG	207564	207593
contig17561R-F	33	GGTATTTTGCCAGCGTTCCAGTCTTTAATAGTC	214308	214276
contig17561R-W2	24	GCAACAAGAAGTGGGCACCCTCCT	214200	214177
contig00091R-F	32	CAGCAGACAATAAACGAGGTTCAATTCTATCC	179798	179829
contig00091R-W2	28	CGAATCAAGACCAAACTTCTCTCCGTTG	179904	179931
contig17056R-F	35	GGTTATTGCCGATTTTAAATATGGAGCAGGAGTTC	208386	208420
contig17056R-W2	30	GAAACCGTAACGCTTACCATCATTCAACCC	208504	208533
