# Supplementary material for: The Complete Genome Sequence of ‘Candidatus Liberibacter solanacearum’, the Bacterium Associated with Potato Zebra Chip Disease
Source: PLoS One. 2011 Apr 28;6(4):e19135. doi: 10.1371/journal.pone.0019135 (PMC3084294; doi:10.1371/journal.pone.0019135)
Supplement: Table S3 — List of ‘ Candidatus Liberibacter solanacearum’and ‘ Candidatus Liberibacter asiaticus’ best hits. (XLSX) [file pone.0019135.s011.xlsx]

## Sheet: Copy of ZC-query-VS-LAS-db-E1e0
Table S3. List of Lso-Las best hits (e-value < 10^-15)
ZC	Annotation	Las		LAS	Annotation	ZC
YP_004062240.1	dinucleoside polyphosphate	YP_003064970.1		YP_003064535.1	hypothetical protein	YP_004063418.1
YP_004062241.1	hypothetical protein CKC_00010	YP_003064971.1		YP_003064537.1	hypothetical protein	YP_004063420.1
YP_004062242.1	thiamine transporter	YP_003064972.1		YP_003064538.1	prophage antirepressor	YP_004062454.1
YP_004062243.1	thiamine transporter membrane	YP_003064973.2		YP_003064539.1	hypothetical protein	YP_004062455.1
YP_004062244.1	thiamine transporter substrate	YP_003064974.1		YP_003064540.1	putative DNA polymerase from	YP_004062456.1
YP_004062245.1	hypothetical protein CKC_00030	YP_003064975.1		YP_003064541.1	VRR-NUC domain-containing	YP_004063425.1
YP_004062248.1	hypothetical protein CKC_00045	YP_003064978.1		YP_003064542.1	hypothetical protein	YP_004063426.1
YP_004062250.1	hypothetical protein CKC_00055	YP_003064980.1		YP_003064543.1	hypothetical protein	YP_004063426.1
YP_004062251.1	phosphoribosylaminoimidazole	YP_003064982.1		YP_003064544.1	DNA ligase, NAD-dependent	YP_004063427.1
YP_004062252.1	phosphoribosylglycinamide	YP_003064983.1		YP_003064545.1	guanylate kinase [Candidatus	YP_004063428.1
YP_004062254.1	hypothetical protein CKC_00075	YP_003064984.1		YP_003064547.1	phage-related	YP_004063431.1
YP_004062255.1	hypothetical protein CKC_00080	YP_003064985.1		YP_003064548.1	hypothetical protein	YP_004062898.1
YP_004062256.1	cysteinyl-tRNA synthetase	YP_003064986.1		YP_003064549.1	ribonucleotide-diphosphate	YP_004062790.1
YP_004062257.1	hypothetical protein CKC_00090	YP_003064988.1		YP_003064550.1	malic enzyme [Candidatus	YP_004063227.1
YP_004062258.1	ABC transporter related	YP_003064989.1		YP_003064551.1	ABC transporter [Candidatus	YP_004063229.1
YP_004062259.1	phosphatidylserine	YP_003064990.1		YP_003064552.1	putative ATP-binding component	YP_004063230.1
YP_004062260.1	phosphatidylserine synthase	YP_003064991.1		YP_003064553.1	putative ABC transporter,	YP_004063231.1
YP_004062261.1	hypothetical protein CKC_00110	YP_003064992.1		YP_003064554.1	putative ABC transporter	YP_004063232.1
YP_004062262.1	1-acyl-sn-glycerol-3-phosphate	YP_003064993.2		YP_003064555.1	DNA-directed RNA polymerase	YP_004063233.1
YP_004062263.1	Methyltransferase type 11	YP_003064995.1		YP_003064556.1	DNA-directed RNA polymerase	YP_004063234.1
YP_004062264.1	glyoxalase II [Candidatus	YP_003064996.1		YP_003064557.1	50S ribosomal protein L12P	YP_004063235.1
YP_004062265.1	50S ribosomal protein L28	YP_003064997.1		YP_003064558.1	50S ribosomal protein L10	YP_004063236.1
YP_004062266.1	molecular chaperone DnaJ	YP_003064998.1		YP_003064559.1	50S ribosomal protein L1	YP_004063237.1
YP_004062267.1	BolA family protein	YP_003064999.1		YP_003064560.1	50S ribosomal protein L11	YP_004063238.1
YP_004062269.1	site-specific tyrosine	YP_003065000.2		YP_003064561.1	transcription antitermination	YP_004063239.1
YP_004062270.1	acetyl-CoA carboxylase	YP_003065001.1		YP_003064562.1	hypothetical protein	YP_004063240.1
YP_004062271.1	hypothetical protein CKC_00160	YP_003065002.1		YP_003064563.1	translation elongation factor	YP_004063309.1
YP_004062272.1	hypothetical protein CKC_00165	YP_003065003.1		YP_003064564.1	tRNA-specific 2-thiouridylase	YP_004063242.1
YP_004062273.1	aminomethyltransferase protein	YP_003065004.1		YP_003064566.1	phosphoserine aminotransferase	YP_004063244.1
YP_004062279.1	hypothetical protein CKC_00200	YP_003065612.1		YP_003064569.1	putative	YP_004063245.1
YP_004062281.1	TPR repeat-containing protein	YP_003065005.1		YP_003064570.1	phosphoribosylaminoimidazole	YP_004063246.1
YP_004062282.1	undecaprenyl pyrophosphate	YP_003065006.1		YP_003064571.1	phosphoribosylaminoimidazole	YP_004063247.1
YP_004062283.1	glutathione S-transferase	YP_003065007.1		YP_003064572.1	hypothetical protein	YP_004063248.1
YP_004062284.1	nucleoside-diphosphate-sugar	YP_003065008.1		YP_003064573.1	hypothetical protein	YP_004063249.1
YP_004062285.1	ABC transporter nucleotide	YP_003065009.1		YP_003064574.1	phytoene synthase protein	YP_004063155.1
YP_004062286.1	ABC transporter permease	YP_003065010.2		YP_003064576.1	ATP-dependent Clp protease	YP_004063156.1
YP_004062287.1	outer membrane protein	YP_003065011.1		YP_003064577.1	ATP-dependent Clp protease	YP_004063157.1
YP_004062288.1	excinuclease ABC subunit C	YP_003065012.2		YP_003064578.1	hypothetical protein	YP_004063158.1
YP_004062289.1		YP_003065013.1		YP_003064579.1	hydrolase protein [Candidatus	YP_004063159.1
YP_004062290.1	ATP-dependent RNA helicase	YP_003065014.1		YP_003064580.1	hypothetical protein	YP_004063160.1
YP_004062291.1	aspartate aminotransferase	YP_003065015.1		YP_003064581.1	monooxygenase FAD-binding	YP_004063161.1
YP_004062292.1	aspartate aminotransferase	YP_003065015.1		YP_003064583.1	cationic amino acid ABC	YP_004063162.1
YP_004062293.1	tRNA/rRNA methyltransferase	YP_003065016.1		YP_003064584.1	ABC transporter membrane	YP_004063163.1
YP_004062294.1	5-aminolevulinate synthase	YP_003065017.1		YP_003064585.1	general L-amino acid transport	YP_004063164.1
YP_004062295.1	putative aminopeptidase	YP_003065018.1		YP_003064586.1	ABC transporter related	YP_004063165.1
YP_004062296.1	cell division protein	YP_003065019.1		YP_003064587.1	putative oxidoreductase	YP_004063166.1
YP_004062297.1	ribosomal large subunit	YP_003065021.1		YP_003064590.1	lipoyltransferase [Candidatus	YP_004063265.1
YP_004062298.1	putative phosphoesterase	YP_003065022.2		YP_003064591.1	queuine	YP_004063266.1
YP_004062299.1	RNA-pseudouridylate synthase	YP_003065023.1		YP_003064593.1	S-adenosylmethionine:tRNA	YP_004063267.1
YP_004062300.1	RNA polymerase factor sigma-32	YP_003065024.1		YP_003064594.1	phosphopantetheine	YP_004063268.1
YP_004062301.1	putative transmembrane protein	YP_003065025.1		YP_003064595.1	DNA gyrase subunit A	YP_004063269.1
YP_004062302.1	adenylosuccinate synthetase	YP_003065026.1		YP_003064596.1	single-strand binding protein	YP_004063270.1
YP_004062303.1	F0F1 ATP synthase subunit	YP_003065027.1		YP_003064597.1	excinuclease ABC subunit A	YP_004063271.1
YP_004062304.1	F0F1 ATP synthase subunit beta	YP_003065028.1		YP_003064598.1	glutamine synthetase protein	YP_004063272.1
YP_004062305.1	F0F1 ATP synthase subunit	YP_003065029.1		YP_003064599.1	glutaminase [Candidatus	YP_004063105.1
YP_004062306.1	F0F1 ATP synthase subunit	YP_003065030.1		YP_003064600.1	30S ribosomal protein S4	YP_004063106.1
YP_004062307.1	F0F1 ATP synthase subunit	YP_003065031.1		YP_003064603.1	fumarate hydratase [Candidatus	YP_004063250.1
YP_004062308.1	phage-related	YP_003064547.1		YP_003064604.1	alanyl-tRNA synthetase	YP_004063251.1
YP_004062309.1	primosome assembly protein	YP_003065032.1		YP_003064605.2	recombinase A [Candidatus	YP_004063252.1
YP_004062310.1	iron-responsive	YP_003065033.1		YP_003064606.1	lipid A ABC exporter family,	YP_004063254.1
YP_004062311.1	small heat shock protein	YP_003065034.1		YP_003064607.1	50S ribosomal protein L31	YP_004063255.1
YP_004062312.1	bifunctional	YP_003065035.1		YP_003064608.1	CTP synthetase [Candidatus	YP_004063111.1
YP_004062313.1	2-polyprenylphenol	YP_003065036.1		YP_003064609.1	hypothetical protein	YP_004063112.1
YP_004062314.1	ubiquinone/menaquinone	YP_003065037.1		YP_003064610.1	triosephosphate isomerase	YP_004063113.1
YP_004062315.1	formamidopyrimidine-DNA	YP_003065038.1		YP_003064611.1	hypothetical protein	YP_004063114.1
YP_004062316.1	30S ribosomal protein S20	YP_003065039.1		YP_003064612.1	outer membrane lipoprotein	YP_004063115.1
YP_004062317.1	chromosomal replication	YP_003065040.1		YP_003064613.1	ferrochelatase [Candidatus	YP_004063116.1
YP_004062318.1	coproporphyrinogen III oxidase	YP_003065041.1		YP_003064614.1	hypothetical protein	YP_004063117.1
YP_004062319.1	putative deoxyribonucleotide	YP_003065042.1		YP_003064615.1	hypothetical protein	YP_004063118.1
YP_004062320.1	ribonuclease PH [Candidatus	YP_003065043.1		YP_003064618.1	prenyltransferase [Candidatus	YP_004063119.1
YP_004062321.1	creatinine amidohydrolase	YP_003065046.1		YP_003064619.1	phosphoribosylamine--glycine	YP_004063120.1
YP_004062322.1	NOL1/NOP2/SUN family signature	YP_003065047.1		YP_003064620.1	hypothetical protein	YP_004063121.1
YP_004062323.1	ribonuclease protein	YP_003064780.1		YP_003064625.1	bacterioferritin comigratory	YP_004063129.1
YP_004062325.1	electron transfer flavoprotein	YP_003064781.1		YP_003064627.1	metal-dependent hydrolase	YP_004062832.1
YP_004062326.1	Electron transfer flavoprotein	YP_003064782.1		YP_003064628.1	hypothetical protein	YP_004062831.1
YP_004062327.1	argininosuccinate lyase	YP_003064783.1		YP_003064629.2	methionyl-tRNA synthetase	YP_004062830.1
YP_004062328.1	diaminopimelate decarboxylase	YP_003064784.1		YP_003064630.1	DNA polymerase III subunit	YP_004062829.1
YP_004062330.1	flagellar biosynthesis protein	YP_003064785.1		YP_003064631.1	thymidylate kinase [Candidatus	YP_004062828.1
YP_004062331.1	flagellar basal	YP_003064786.1		YP_003064635.1	DNA topoisomerase IV subunit B	YP_004062827.1
YP_004062332.1	flagellar basal body L-ring	YP_003064787.1		YP_003064636.1	ABC transporter permease	YP_004062826.1
YP_004062333.1	hypothetical protein CKC_00470	YP_003064788.1		YP_003064637.1	hypothetical protein	YP_004062825.1
YP_004062334.1	flagellar basal body P-ring	YP_003064789.1		YP_003064638.1	peptidyl-tRNA hydrolase	YP_004062824.1
YP_004062335.1	flagellar basal body P-ring	YP_003064790.1		YP_003064639.1	translation-associated GTPase	YP_004062823.1
YP_004062336.1	flagellar basal body rod	YP_003064791.1		YP_003064640.1		YP_004062822.1
YP_004062337.1	flagellar hook-basal body	YP_003064792.1		YP_003064641.1	hypothetical protein	YP_004062821.1
YP_004062338.1	flagellar basal body rod	YP_003064793.1		YP_003064642.1	hypothetical protein	YP_004063275.1
YP_004062339.1	flagellar basal body rod	YP_003064794.1		YP_003064645.1	inorganic pyrophosphatase	YP_004063278.1
YP_004062340.1	flagellum-specific ATP	YP_003065097.1		YP_003064646.1	GTP-binding protein	YP_004063279.1
YP_004062341.1	flagellar basal body rod	YP_003065098.1		YP_003064647.1	argininosuccinate synthase	YP_004063280.1
YP_004062342.1	flagellar motor protein MotA	YP_003065099.2		YP_003064649.1	50S ribosomal protein L17	YP_004063282.1
YP_004062343.1	flagellar motor switch protein	YP_003065100.1		YP_003064650.1	DNA-directed RNA polymerase	YP_004063283.1
YP_004062344.1	putative flagellar motor	YP_003065101.1		YP_003064651.1	30S ribosomal protein S11	YP_004063284.1
YP_004062345.1	flagellar motor switch protein	YP_003065102.1		YP_003064652.1	30S ribosomal protein S13	YP_004063285.1
YP_004062346.1	flagellar biosynthesis protein	YP_003065103.1		YP_003064653.1	adenylate kinase [Candidatus	YP_004063286.1
YP_004062347.1	transcriptional regulator	YP_003065106.1		YP_003064654.1	preprotein translocase subunit	YP_004063287.1
YP_004062348.1	probable transcriptional	YP_003065107.1		YP_003064655.1	50S ribosomal protein L15	YP_004063288.1
YP_004062349.1	flagellar MS-ring protein	YP_003065108.1		YP_003064656.1	50S ribosomal protein L30	YP_004063289.1
YP_004062350.1	glutathione synthetase	YP_003065109.1		YP_003064657.1	30S ribosomal protein S5	YP_004063290.1
YP_004062351.1	large conductance	YP_003065110.1		YP_003064658.1	50S ribosomal protein L18	YP_004063291.1
YP_004062352.1	D-alanyl-D-alanine	YP_003065111.1		YP_003064659.1	50S ribosomal protein L6	YP_004063292.1
YP_004062353.1	hypothetical protein CKC_00570	YP_003065112.1		YP_003064660.1	30S ribosomal protein S8	YP_004063293.1
YP_004062354.1	serine protease DO-like	YP_003065113.1		YP_003064661.1	30S ribosomal protein S14	YP_004063294.1
YP_004062355.1	putative two-component sensor	YP_003065114.1		YP_003064662.1	50S ribosomal protein L5	YP_004063295.1
YP_004062356.1	heat shock protein [Candidatus	YP_003065115.2		YP_003064663.1	50S ribosomal protein L24	YP_004063296.1
YP_004062357.1	putative phosphate transport	YP_003065116.1		YP_003064664.1	50S ribosomal protein L14	YP_004063297.1
YP_004062358.1	ABC transporter, nucleotide	YP_003065117.1		YP_003064665.1	30S ribosomal protein S17	YP_004063298.1
YP_004062359.1	phosphate ABC transporter,	YP_003065118.1		YP_003064666.1	ribosomal protein L29	YP_004063299.1
YP_004062360.1	ABC transporter, membrane	YP_003065119.2		YP_003064667.1	50S ribosomal protein L16	YP_004063300.1
YP_004062361.1	putative phosphate-binding	YP_003065120.1		YP_003064668.1	30S ribosomal protein S3	YP_004063301.1
YP_004062362.1	intracellular septation	YP_003065121.1		YP_003064669.1	50S ribosomal protein L22	YP_004063302.1
YP_004062363.1	cell division protein	YP_003065122.1		YP_003064670.1	SSU ribosomal protein S19P	YP_004063303.1
YP_004062364.1	diaminopimelate epimerase	YP_003065123.1		YP_003064671.1	50S ribosomal protein L2	YP_004063304.1
YP_004062365.1	signal recognition particle	YP_003065124.1		YP_003064672.1	50S ribosomal protein L23	YP_004063305.1
YP_004062366.1	30S ribosomal protein S16	YP_003065125.1		YP_003064673.1	50S ribosomal protein L4	YP_004063306.1
YP_004062367.1	16S rRNA-processing protein	YP_003065126.1		YP_003064674.1	50S ribosomal protein L3	YP_004063307.1
YP_004062368.1	tRNA	YP_003065127.1		YP_003064675.1	30S ribosomal protein S10	YP_004063308.1
YP_004062369.1	50S ribosomal protein L19	YP_003065128.1		YP_003064676.1	translation elongation factor	YP_004063309.1
YP_004062370.1	6-phosphogluconate	YP_003065129.1		YP_003064677.1	elongation factor G	YP_004063310.1
YP_004062371.1	zinc uptake ABC transporter	YP_003065130.1		YP_003064678.1	30S ribosomal protein S7	YP_004063311.1
YP_004062372.1	putative high-affinity zinc	YP_003065131.1		YP_003064679.1	30S ribosomal protein S12	YP_004063313.1
YP_004062373.1	zinc uptake ABC transporter,	YP_003065132.1		YP_003064680.1	acetyl-CoA carboxylase biotin	YP_004063314.1
YP_004062374.1	Ferroxidase [Candidatus	YP_003065133.1		YP_003064681.1	acetyl-CoA carboxylase biotin	YP_004063315.1
YP_004062375.1	pilus component protein	YP_003065134.1		YP_003064682.1		YP_004063316.1
YP_004062376.1	pilus assembly protein	YP_003065135.1		YP_003064683.1	ATP-dependent protease La	YP_004063317.1
YP_004062377.1	component of type IV pilus	YP_003065137.1		YP_003064684.1	ATP-dependent protease	YP_004063318.1
YP_004062378.1	response regulator receiver	YP_003065138.1		YP_003064685.1	ATP-dependent Clp protease	YP_004063319.1
YP_004062379.1	hypothetical protein CKC_00700	YP_003065139.2		YP_003064686.1	putative ABC transporter	YP_004063321.1
YP_004062380.1	putative pilus assembly	YP_003065140.1		YP_003064687.1	lysophospholipase protein	YP_004063322.1
YP_004062381.1	pilus assembly protein	YP_003065141.1		YP_003064688.1	SsrA-binding protein	YP_004063323.1
YP_004062382.1	peptidase A24A prepilin type	YP_003065142.1		YP_003064689.1	dihydrodipicolinate synthase	YP_004063324.1
YP_004062385.1	hypothetical protein CKC_00730	YP_003065145.1		YP_003064690.1	DNA polymerase I [Candidatus	YP_004063326.1
YP_004062386.1	hypothetical protein CKC_00735	YP_003065145.1		YP_003064691.1	phosphoglyceromutase	YP_004063327.1
YP_004062390.1	hypothetical protein CKC_00755	YP_003065151.2		YP_003064692.1	dihydrodipicolinate reductase	YP_004063328.1
YP_004062391.1	hypothetical protein CKC_00760	YP_003065152.1		YP_003064693.1	glucokinase [Candidatus	YP_004063329.1
YP_004062392.1	peptidase S16 lon domain	YP_003065153.1		YP_003064694.1	cytochrome-c oxidase assembly	YP_004063330.1
YP_004062393.1	carboxynorspermidine	YP_003065154.1		YP_003064695.1	putative transcription	YP_004063331.1
YP_004062394.1	hypothetical protein CKC_00775	YP_003065155.1		YP_003064696.1	thioredoxin reductase (NADPH)	YP_004063332.1
YP_004062395.1	putative uracil-DNA	YP_003065156.1		YP_003064697.1	hypothetical protein	YP_004063333.1
YP_004062396.1	ABC transporter nucleotide	YP_003065157.1		YP_003064698.1	arginyl-tRNA synthetase	YP_004063334.1
YP_004062397.1	OstA family protein	YP_003065158.1		YP_003064699.1	deoxyguanosinetriphosphate	YP_004063335.1
YP_004062398.1	hypothetical protein CKC_00795	YP_003065159.1		YP_003064700.1	iron-sulfur cluster assembly	YP_004063336.1
YP_004062399.1	putative protease IV	YP_003065160.1		YP_003064701.1	exodeoxyribonuclease III	YP_004063337.1
YP_004062400.1	integration host factor, beta	YP_003065161.1		YP_003064702.1	RNA polymerase sigma factor	YP_004063338.1
YP_004062401.1	lipoprotein signal peptidase	YP_003065162.1		YP_003064704.1	hypothetical protein	YP_004063341.1
YP_004062402.1	DNA mismatch repair protein	YP_003065163.1		YP_003064705.1	50S ribosomal protein L13	YP_004063342.1
YP_004062403.1	ribonuclease E [Candidatus	YP_003065164.1		YP_003064706.1	30S ribosomal protein S9	YP_004063343.1
YP_004062404.1	penicillin binding	YP_003065165.1		YP_003064707.1		YP_004063344.1
YP_004062405.1	peptide chain release factor 2	YP_003065166.1		YP_003064708.1	tRNA pseudouridine synthase A	YP_004063345.1
YP_004062406.1	inorganic	YP_003065167.1		YP_003064709.2	methionyl-tRNA	YP_004063346.1
YP_004062407.1	octaprenyl-diphosphate	YP_003065168.1		YP_003064710.1	peptide deformylase	YP_004063347.1
YP_004062408.1	methyltransferase protein	YP_003065169.2		YP_003064711.1	putative transmembrane protein	YP_004063349.1
YP_004062409.1	glycyl-tRNA synthetase subunit	YP_003065170.1		YP_003064712.1	acyl-CoA dehydrogenase protein	YP_004062765.1
YP_004062410.1	hypothetical protein CKC_00855	YP_003065171.1		YP_003064713.1	aspartate carbamoyltransferase	YP_004062764.1
YP_004062411.1	phage-related lysozyme	YP_003065469.1		YP_003064714.1	dihydroorotase [Candidatus	YP_004062763.1
YP_004062413.1	hypothetical protein CKC_00870	YP_003065612.1		YP_003064715.1	putative glycerol-3-phosphate	YP_004062762.1
YP_004062415.1	hypothetical protein CKC_00880	YP_003065615.1		YP_003064716.1	DNA protecting protein DprA	YP_004062761.1
YP_004062417.1	hypothetical protein CKC_00890	YP_003065617.1		YP_003064719.1	DNA topoisomerase I	YP_004062759.1
YP_004062419.1	hypothetical protein CKC_00900	YP_003065618.1		YP_003064720.1	aspartate-semialdehyde	YP_004062758.1
YP_004062420.1	hypothetical protein CKC_00905	YP_003065619.1		YP_003064721.1	putative membrane-bound lytic	YP_004062756.1
YP_004062422.1	hypothetical protein CKC_00915	YP_003065621.1		YP_003064722.1	comF family protein	YP_004062755.1
YP_004062423.1	hypothetical protein CKC_00920	YP_003065622.1		YP_003064723.1	hypothetical protein	YP_004062755.1
YP_004062424.1	hypothetical protein CKC_00925	YP_003065623.1		YP_003064724.1	hypothetical protein	YP_004062754.1
YP_004062426.1	hypothetical protein CKC_00935	YP_003065625.1		YP_003064725.1	response regulator receiver	YP_004062753.1
YP_004062427.1	head-to-tail joining protein,	YP_003065626.1		YP_003064726.1	ribosomal RNA	YP_004062751.1
YP_004062429.1	putative phage terminase,	YP_003065628.1		YP_003064727.1	outer membrane protein	YP_004062750.1
YP_004062430.1	hypothetical protein CKC_00955	YP_003065630.1		YP_003064729.1	phenylalanyl-tRNA synthetase	YP_004062749.1
YP_004062431.1	hypothetical protein CKC_00960	YP_003065631.1		YP_003064730.1	phenylalanyl-tRNA synthetase,	YP_004062748.1
YP_004062433.1	hypothetical protein CKC_00970	YP_003065636.1		YP_003064731.1	ribosomal protein L20	YP_004062747.1
YP_004062435.1	prophage antirepressor	YP_003064538.1		YP_003064732.1	50S ribosomal protein L35	YP_004062746.1
YP_004062442.1	hypothetical protein CKC_01015	YP_003084344.1		YP_003064733.1	translation initiation factor	YP_004062745.1
YP_004062444.1	P4 family phage/plasmid	YP_003065638.1		YP_003064734.1	GTP-binding protein LepA	YP_004062743.1
YP_004062445.1	P4 family phage/plasmid	YP_003065638.1		YP_003064735.1	SAM-dependent	YP_004062742.1
YP_004062450.1	hypothetical protein CKC_01055	YP_003064535.1		YP_003064736.1	ATP/ADP translocase	YP_004062741.1
YP_004062452.1	hypothetical protein CKC_01065	YP_003064537.1		YP_003064737.1	hypothetical protein	YP_004062740.1
YP_004062454.1	prophage antirepressor	YP_003064538.1		YP_003064738.1	mutator MutT protein	YP_004062739.1
YP_004062455.1	hypothetical protein CKC_01080	YP_003064539.1		YP_003064739.1	bifunctional ornithine	YP_004062738.1
YP_004062456.1	putative DNA polymerase from	YP_003064540.1		YP_003064740.1	preprotein translocase subunit	YP_004062737.1
YP_004062457.1	VRR-NUC domain-containing	YP_003064541.1		YP_003064741.1	UDP-glucose 4-epimerase	YP_004062736.1
YP_004062458.1	SNF2 related protein	YP_003065608.2		YP_003064742.1	30S ribosomal protein S6	YP_004062735.1
YP_004062459.1	DNA ligase, NAD-dependent	YP_003064544.1		YP_003064743.1	30S ribosomal protein S18	YP_004062734.1
YP_004062460.1	guanylate kinase [Candidatus	YP_003064545.1		YP_003064744.1	50S ribosomal protein L9	YP_004062733.1
YP_004062463.1	integrase family protein	YP_003064547.1		YP_003064745.1	replicative DNA helicase	YP_004062732.1
YP_004062464.1	hypothetical protein CKC_01125	YP_003065173.1		YP_003064746.1	alanine racemase [Candidatus	YP_004062731.1
YP_004062465.1	probable FAD-dependent	YP_003065174.1		YP_003064747.1	DNA repair protein RadA	YP_004062730.1
YP_004062466.1	recombination protein RecR	YP_003065175.1		YP_003064748.1	colicin V production protein	YP_004062728.1
YP_004062467.1	hypothetical protein CKC_01140	YP_003065176.1		YP_003064749.1	amidophosphoribosyltransferase	YP_004062727.1
YP_004062470.1	hypothetical protein CKC_01155	YP_003065177.1		YP_003064750.1	oxidoreductase protein	YP_004062726.1
YP_004062471.1	3-deoxy-manno-octulosonate	YP_003065178.1		YP_003064753.1	proline/glycine betaine ABC	YP_004062725.1
YP_004062472.1	recombination protein F	YP_003065179.1		YP_003064754.1	proline/glycine betaine ABC	YP_004062724.1
YP_004062473.1	lipid-A-disaccharide synthase	YP_003065180.1		YP_003064755.1	substrate-binding region of	YP_004062723.1
YP_004062474.1	hypothetical protein CKC_01175	YP_003065181.1		YP_003064756.1	probable cation efflux protein	YP_004062722.1
YP_004062475.1	UDP-N-acetylglucosamine	YP_003065182.2		YP_003064757.1	7-cyano-7-deazaguanine	YP_004062721.1
YP_004062476.1	(3R)-hydroxymyristoyl-ACP	YP_003065183.1		YP_003064758.1	transcription antitermination	YP_004062720.1
YP_004062477.1	UDP-3-O-[3-hydroxymyristoyl]	YP_003065184.1		YP_003064759.1	riboflavin synthase subunit	YP_004062719.1
YP_004062478.1	surface antigen (D15)	YP_003065185.1		YP_003064760.1	riboflavin synthase subunit	YP_004062718.1
YP_004062479.1	zinc metallopeptidase	YP_003065186.1		YP_003064761.1		YP_004062717.1
YP_004062480.1	phosphatidate	YP_003065187.1		YP_003064762.1	serine	YP_004062716.1
YP_004062481.1	undecaprenyl diphosphate	YP_003065188.1		YP_003064763.1	hypothetical protein	YP_004062715.1
YP_004062482.1	ribosome recycling factor	YP_003065189.1		YP_003064764.1	MarR family transcriptional	YP_004062714.1
YP_004062483.1	uridylate kinase [Candidatus	YP_003065190.1		YP_003064765.2	delta-aminolevulinic acid	YP_004062713.1
YP_004062484.1	elongation factor Ts	YP_003065191.1		YP_003064766.1	DNA topoisomerase IV subunit A	YP_004062712.1
YP_004062485.1	30S ribosomal protein S2	YP_003065192.1		YP_003064768.1	type II citrate synthase	YP_004062711.1
YP_004062486.1	histidine triad (HIT) protein	YP_003065193.1		YP_003064771.2	Cytidine/deoxycytidylate	YP_004062670.1
YP_004062487.1		YP_003065194.1		YP_003064772.1	GTP cyclohydrolase II protein	YP_004062669.1
YP_004062488.1	succinyl-diaminopimelate	YP_003065195.1		YP_003064773.1	protoheme IX	YP_004062668.1
YP_004062490.1	phage-related	YP_003064547.1		YP_003064774.1	ribosomal protein L32	YP_004062667.1
YP_004062492.1	phage-related	YP_003064547.1		YP_003064775.2	Na+/H+ antiporter NhaA	YP_004062666.1
YP_004062494.1	transcription regulator	YP_003065196.1		YP_003064776.1	ferredoxin-NADP+ reductase	YP_004062665.1
YP_004062495.1	polynucleotide	YP_003065197.1		YP_003064777.1	ferredoxin-NADP+ reductase	YP_004062665.1
YP_004062496.1	30S ribosomal protein S15	YP_003065198.1		YP_003064778.1	UTP-glucose-1-phosphate	YP_004062664.1
YP_004062497.1	ribosome-binding factor A	YP_003065199.1		YP_003064779.2	hypothetical protein	YP_004062663.1
YP_004062498.1	translation initiation factor	YP_003065200.1		YP_003064780.1	ribonuclease protein	YP_004062323.1
YP_004062499.1	transcription elongation	YP_003065201.1		YP_003064781.1	electron transfer flavoprotein	YP_004062325.1
YP_004062500.1	hypothetical protein CKC_01305	YP_003065202.1		YP_003064782.1	Electron transfer flavoprotein	YP_004062326.1
YP_004062501.1	hypothetical protein CKC_01310	YP_003065203.1		YP_003064783.1	argininosuccinate lyase	YP_004062327.1
YP_004062502.1	exodeoxyribonuclease VII large	YP_003065204.1		YP_003064784.1	diaminopimelate decarboxylase	YP_004062328.1
YP_004062503.1	aminopeptidase protein	YP_003065205.2		YP_003064785.1	flagellar biosynthesis protein	YP_004062330.1
YP_004062504.1	integral membrane protein MviN	YP_003065206.1		YP_003064786.1	flagellar basal	YP_004062331.1
YP_004062505.1	tryptophanyl-tRNA synthetase	YP_003065207.1		YP_003064787.1	flagellar basal body L-ring	YP_004062332.1
YP_004062506.1	homoserine kinase [Candidatus	YP_003065208.1		YP_003064788.1	hypothetical protein	YP_004062333.1
YP_004062507.1	ribonuclease H [Candidatus	YP_003065209.1		YP_003064789.1	flagellar basal body P-ring	YP_004062334.1
YP_004062508.1	hypothetical protein CKC_01345	YP_003065416.1		YP_003064790.1	flagellar basal body P-ring	YP_004062335.1
YP_004062509.1	possible lolA type protein	YP_003065211.1		YP_003064791.1	flagellar basal body rod	YP_004062336.1
YP_004062510.1	DNA translocase FtsK	YP_003065212.1		YP_003064792.1	flagellar hook-basal body	YP_004062337.1
YP_004062511.1	putative cytoplasmic protein	YP_003065213.1		YP_003064793.1	flagellar basal body rod	YP_004062338.1
YP_004062512.1	hypothetical protein CKC_01365	YP_003065214.1		YP_003064794.1	flagellar basal body rod	YP_004062339.1
YP_004062513.1	leucyl-tRNA synthetase	YP_003065215.1		YP_003064795.1	ATP dependent RNA helicase	YP_004062695.1
YP_004062514.1	hypothetical protein CKC_01375	YP_003065216.1		YP_003064796.1	endonuclease III [Candidatus	YP_004062693.1
YP_004062515.1	DNA polymerase III subunit	YP_003065217.1		YP_003064797.1	serralysin [Candidatus	YP_004062692.1
YP_004062516.1	DNA polymerase III subunit	YP_003065217.1		YP_003064798.2	Type I secretion system	YP_004062691.1
YP_004062517.1	chromosome partitioning	YP_003065218.1		YP_003064799.1	Type I secretion membrane	YP_004062690.1
YP_004062518.1	chromosome partitioning	YP_003065219.1		YP_003064800.1	C4-dicarboxylate transporter	YP_004062689.1
YP_004062519.1	16S rRNA methyltransferase	YP_003065220.1		YP_003064801.1	hypothetical protein	YP_004062688.1
YP_004062520.1	tRNA uridine	YP_003065221.1		YP_003064803.1	nucleoside diphosphate kinase	YP_004062687.1
YP_004062521.1	tRNA modification GTPase TrmE	YP_003065222.1		YP_003064804.1	DNA polymerase III subunit chi	YP_004062686.1
YP_004062522.1	transcription termination	YP_003065223.1		YP_003064805.1	leucyl aminopeptidase	YP_004062685.1
YP_004062523.1	hypothetical protein CKC_01420	YP_003065224.1		YP_003064806.2	permease protein [Candidatus	YP_004062684.1
YP_004062524.1	uroporphyrinogen decarboxylase	YP_003065225.1		YP_003064807.2	putative permease protein	YP_004062683.1
YP_004062525.1	Maf-like protein [Candidatus	YP_003065226.1		YP_003064808.1	organic solvent tolerance	YP_004062682.1
YP_004062526.1	DNA gyrase subunit B	YP_003065227.1		YP_003064809.1	peptidyl-prolyl cis-trans	YP_004062681.1
YP_004062528.1	hypothetical protein CKC_01445	YP_003065228.1		YP_003064810.1	4-hydroxythreonine-4-phosphate	YP_004062680.1
YP_004062530.1	DNA polymerase III subunit	YP_003065231.1		YP_003064811.1	dimethyladenosine transferase	YP_004062679.1
YP_004062531.1	dephospho-CoA kinase	YP_003065232.2		YP_003064812.1	DNA mismatch repair protein	YP_004062678.1
YP_004062532.1	acetyl-CoA carboxylase subunit	YP_003065233.1		YP_003064813.1	hypothetical protein	YP_004062677.1
YP_004062533.1	FolC bifunctional protein	YP_003065234.1		YP_003064814.1	tetraacyldisaccharide	YP_004062676.1
YP_004062534.1	thioredoxin [Candidatus	YP_003065235.1		YP_003064815.1		YP_004062675.1
YP_004062536.1	double-strand break repair	YP_003065236.1		YP_003064816.1	hypothetical protein	YP_004062674.1
YP_004062537.1	hypothetical protein CKC_01490	YP_003065237.1		YP_003064817.1	inositol monophosphatase	YP_004062673.1
YP_004062538.1	two-component sensor histidine	YP_003065238.2		YP_003064818.1	hypothetical protein	YP_004062672.1
YP_004062539.1	phosphoenolpyruvate	YP_003065239.1		YP_003064819.1	putative ribosomal large	YP_004062671.1
YP_004062540.1	pantothenate kinase	YP_003065240.1		YP_003064821.1	hypothetical protein	YP_004062638.1
YP_004062541.1	ATP-dependent protease	YP_003065241.1		YP_003064822.1	ribose-phosphate	YP_004062637.1
YP_004062542.1	ATP-dependent protease	YP_003065242.1		YP_003064823.1	hypothetical protein	YP_004062636.1
YP_004062543.1	3-oxoacyl-(acyl carrier	YP_003064902.1		YP_003064824.1	prolipoprotein diacylglyceryl	YP_004062635.1
YP_004062544.1		YP_003064901.1		YP_003064825.1	hypothetical protein	YP_004062634.1
YP_004062545.1	dithiobiotin synthetase	YP_003064900.1		YP_003064826.1	PAS/PAC sensor signal	YP_004062632.1
YP_004062546.1	8-amino-7-oxononanoate	YP_003064899.1		YP_003064827.1	GMP synthase [Candidatus	YP_004062631.1
YP_004062547.1	biotin synthase [Candidatus	YP_003064898.1		YP_003064828.2	integral membrane protein TerC	YP_004062630.1
YP_004062549.1	GTPase EngB [Candidatus	YP_003064897.1		YP_003064829.1	putative ferredoxin protein	YP_004062629.1
YP_004062550.1	putative inner membrane	YP_003064896.1		YP_003064830.1	transcriptional regulator CarD	YP_004062628.1
YP_004062551.1	ribonuclease P [Candidatus	YP_003064895.1		YP_003064831.1	50S ribosomal protein	YP_004062627.1
YP_004062552.1	50S ribosomal protein L34	YP_003064894.1		YP_003064832.1	aspartyl-tRNA synthetase	YP_004062626.1
YP_004062553.1	2'-deoxycytidine	YP_003064893.1		YP_003064833.1	carbamoyl phosphate synthase	YP_004062625.1
YP_004062554.1	A/G-specific adenine	YP_003064892.1		YP_003064834.1	hypothetical protein	YP_004062624.1
YP_004062555.1	hypothetical protein CKC_01580	YP_003064891.1		YP_003064835.2	GTP-binding protein EngA	YP_004062623.1
YP_004062556.1	DSBA oxidoreductase	YP_003064890.1		YP_003064836.1	S-adenosylmethionine	YP_004062620.1
YP_004062557.1	two component response	YP_003064889.1		YP_003064837.1	transcriptional regulator	YP_004062619.1
YP_004062558.1	50S ribosomal protein L33	YP_003064888.1		YP_003064838.1	apolipoprotein	YP_004062618.1
YP_004062559.1	ubiquinol oxidase, subunit II	YP_003064887.1		YP_003064839.1	hemolysin protein [Candidatus	YP_004062617.1
YP_004062560.1	cytochrome O ubiquinol oxidase	YP_003064886.1		YP_003064840.1	hypothetical protein	YP_004062616.1
YP_004062561.1	cytochrome o ubiquinol oxidase	YP_003064885.1		YP_003064841.2	2-methylthioadenine synthetase	YP_004062613.1
YP_004062562.1	cytochrome o ubiquinol oxidase	YP_003064884.1		YP_003064842.1	hypothetical protein	YP_004062612.1
YP_004062563.1	translation initiation factor	YP_003064883.1		YP_003064843.1	nitrogen fixation protein	YP_004062611.1
YP_004062564.1	zinc-binding protein	YP_003064882.1		YP_003064844.1	hypothetical protein	YP_004062610.1
YP_004062565.1	sensory box/GGDEF family	YP_003064881.1		YP_003064845.1	acetylornithine transaminase	YP_004062609.1
YP_004062566.1	exodeoxyribonuclease VII small	YP_003064880.1		YP_003064846.2	ornithine carbamoyltransferase	YP_004062608.1
YP_004062568.1	putative modification	YP_003064879.1		YP_003064847.1	dihydroorotate dehydrogenase 2	YP_004062607.1
YP_004062575.1	threonine synthase [Candidatus	YP_003064878.1		YP_003064848.1	peptidase S11,	YP_004062606.1
YP_004062576.1	M16 family peptidase	YP_003064877.1		YP_003064849.1	hypothetical protein	YP_004062604.1
YP_004062577.1	putative peptidoglycan binding	YP_003064876.1		YP_003064850.1	30S ribosomal protein S21	YP_004062603.1
YP_004062578.1	enoyl-(acyl carrier protein)	YP_003064875.1		YP_003064851.1	pyridoxine 5'-phosphate	YP_004062602.1
YP_004062579.1	3-oxoacyl-(acyl carrier	YP_003064874.1		YP_003064852.1	carbamoyl phosphate synthase	YP_004062601.1
YP_004062580.1	3-hydroxydecanoyl-(acyl	YP_003064873.1		YP_003064853.1	transcription elongation	YP_004062600.1
YP_004062582.1	hypothetical protein CKC_01715	YP_003064872.1		YP_003064854.2	glycosyl transferase group 1	YP_004062599.1
YP_004062583.1	3-phosphoshikimate	YP_003064871.1		YP_003064855.1	pyruvate kinase [Candidatus	YP_004062598.1
YP_004062584.1	cytidylate kinase [Candidatus	YP_003064870.1		YP_003064856.1	hypothetical protein	YP_004062597.1
YP_004062585.1	30S ribosomal protein S1	YP_003064869.1		YP_003064857.1	bacteriophage repressor	YP_004062596.1
YP_004062586.1	nicotinate	YP_003064868.1		YP_003064858.1	isoleucyl-tRNA synthetase	YP_004062595.1
YP_004062587.1	DNA polymerase III subunit	YP_003064867.1		YP_003064859.1	hypothetical protein	YP_004062594.1
YP_004062588.1	orotidine 5'-phosphate	YP_003064866.1		YP_003064861.1	hypothetical protein	YP_004062593.1
YP_004062589.1	hypothetical protein CKC_01750	YP_003064865.1		YP_003064862.1	hypothetical protein	YP_004062592.1
YP_004062590.1	aconitate hydratase	YP_003064864.1		YP_003064863.1	two-component sensor histidine	YP_004062591.1
YP_004062591.1	two-component sensor histidine	YP_003064863.1		YP_003064864.1	aconitate hydratase	YP_004062590.1
YP_004062592.1	hypothetical protein CKC_01765	YP_003064862.1		YP_003064865.1	hypothetical protein	YP_004062589.1
YP_004062593.1	hypothetical protein CKC_01770	YP_003064861.1		YP_003064866.1	orotidine 5'-phosphate	YP_004062588.1
YP_004062594.1	hypothetical protein CKC_01775	YP_003064859.1		YP_003064867.1	DNA polymerase III subunit	YP_004062587.1
YP_004062595.1	isoleucyl-tRNA synthetase	YP_003064858.1		YP_003064868.1	nicotinate	YP_004062586.1
YP_004062596.1	bacteriophage repressor	YP_003064857.1		YP_003064869.1	30S ribosomal protein S1	YP_004062585.1
YP_004062597.1	hypothetical protein CKC_01790	YP_003064856.1		YP_003064870.1	cytidylate kinase [Candidatus	YP_004062584.1
YP_004062598.1	pyruvate kinase [Candidatus	YP_003064855.1		YP_003064871.1	3-phosphoshikimate	YP_004062583.1
YP_004062599.1	glycosyl transferase group 1	YP_003064854.2		YP_003064872.1	hypothetical protein	YP_004062582.1
YP_004062600.1	transcription elongation	YP_003064853.1		YP_003064873.1	3-hydroxydecanoyl-(acyl	YP_004062580.1
YP_004062601.1	carbamoyl phosphate synthase	YP_003064852.1		YP_003064874.1	3-oxoacyl-(acyl carrier	YP_004062579.1
YP_004062602.1	pyridoxine 5'-phosphate	YP_003064851.1		YP_003064875.1	enoyl-(acyl carrier protein)	YP_004062578.1
YP_004062603.1	30S ribosomal protein S21	YP_003064850.1		YP_003064876.1	putative peptidoglycan binding	YP_004062577.1
YP_004062604.1	hypothetical protein CKC_01825	YP_003064849.1		YP_003064877.1	M16 family peptidase	YP_004062576.1
YP_004062606.1	peptidase S11,	YP_003064848.1		YP_003064878.1	threonine synthase [Candidatus	YP_004062575.1
YP_004062607.1	dihydroorotate dehydrogenase 2	YP_003064847.1		YP_003064879.1	putative modification	YP_004062568.1
YP_004062608.1	ornithine carbamoyltransferase	YP_003064846.2		YP_003064880.1	exodeoxyribonuclease VII small	YP_004062566.1
YP_004062609.1	acetylornithine transaminase	YP_003064845.1		YP_003064881.1	sensory box/GGDEF family	YP_004062565.1
YP_004062610.1	hypothetical protein CKC_01855	YP_003064844.1		YP_003064882.1	zinc-binding protein	YP_004062564.1
YP_004062611.1	nitrogen fixation protein	YP_003064843.1		YP_003064883.1	translation initiation factor	YP_004062563.1
YP_004062612.1	hypothetical protein CKC_01865	YP_003064842.1		YP_003064884.1	cytochrome o ubiquinol oxidase	YP_004062562.1
YP_004062613.1	2-methylthioadenine synthetase	YP_003064841.2		YP_003064885.1	cytochrome o ubiquinol oxidase	YP_004062561.1
YP_004062616.1	hypothetical protein CKC_01885	YP_003064840.1		YP_003064886.1	cytochrome O ubiquinol oxidase	YP_004062560.1
YP_004062617.1	hemolysin protein [Candidatus	YP_003064839.1		YP_003064887.1	ubiquinol oxidase, subunit II	YP_004062559.1
YP_004062618.1	apolipoprotein	YP_003064838.1		YP_003064888.1	50S ribosomal protein L33	YP_004062558.1
YP_004062619.1	transcriptional regulator	YP_003064837.1		YP_003064889.1	two component response	YP_004062557.1
YP_004062620.1	S-adenosylmethionine	YP_003064836.1		YP_003064890.1	DSBA oxidoreductase	YP_004062556.1
YP_004062623.1	GTP-binding protein EngA	YP_003064835.2		YP_003064891.1	hypothetical protein	YP_004062555.1
YP_004062624.1	hypothetical protein CKC_01925	YP_003064834.1		YP_003064892.1	A/G-specific adenine	YP_004062554.1
YP_004062625.1	carbamoyl phosphate synthase	YP_003064833.1		YP_003064893.1	2'-deoxycytidine	YP_004062553.1
YP_004062626.1	aspartyl-tRNA synthetase	YP_003064832.1		YP_003064894.1	50S ribosomal protein L34	YP_004062552.1
YP_004062627.1	50S ribosomal protein	YP_003064831.1		YP_003064895.1	ribonuclease P [Candidatus	YP_004062551.1
YP_004062628.1	transcriptional regulator CarD	YP_003064830.1		YP_003064896.1	putative inner membrane	YP_004062550.1
YP_004062629.1	putative ferredoxin protein	YP_003064829.1		YP_003064897.1	GTPase EngB [Candidatus	YP_004062549.1
YP_004062630.1	integral membrane protein TerC	YP_003064828.2		YP_003064898.1	biotin synthase [Candidatus	YP_004062547.1
YP_004062631.1	GMP synthase [Candidatus	YP_003064827.1		YP_003064899.1	8-amino-7-oxononanoate	YP_004062546.1
YP_004062632.1	PAS/PAC sensor signal	YP_003064826.1		YP_003064900.1	dithiobiotin synthetase	YP_004062545.1
YP_004062634.1	hypothetical protein CKC_01975	YP_003064825.1		YP_003064901.1		YP_004062544.1
YP_004062635.1	prolipoprotein diacylglyceryl	YP_003064824.1		YP_003064902.1	3-oxoacyl-(acyl carrier	YP_004062543.1
YP_004062636.1	hypothetical protein CKC_01985	YP_003064823.1		YP_003064903.1	site-specific tyrosine	YP_004063187.1
YP_004062637.1	ribose-phosphate	YP_003064822.1		YP_003064904.1	Mrp protein [Candidatus	YP_004062819.1
YP_004062638.1	hypothetical protein CKC_01995	YP_003064821.1		YP_003065242.1	ATP-dependent protease	YP_004062542.1
YP_004062640.1	Fmu (Sun) domain protein	YP_003065079.1		YP_003065241.1	ATP-dependent protease	YP_004062541.1
YP_004062641.1	bifunctional	YP_003065077.1		YP_003065240.1	pantothenate kinase	YP_004062540.1
YP_004062642.1	carbonate dehydratase	YP_003065076.1		YP_003065239.1	phosphoenolpyruvate	YP_004062539.1
YP_004062643.1	NAD-glutamate dehydrogenase	YP_003065075.1		YP_003065238.2	two-component sensor histidine	YP_004062538.1
YP_004062644.1	exonuclease I [Candidatus	YP_003065074.1		YP_003065237.1	hypothetical protein	YP_004062537.1
YP_004062645.1	hypothetical protein CKC_02030	YP_003065073.1		YP_003065236.1	double-strand break repair	YP_004062536.1
YP_004062646.1	hypothetical protein CKC_02035	YP_003065072.1		YP_003065235.1	thioredoxin [Candidatus	YP_004062534.1
YP_004062647.1	5-formyltetrahydrofolate	YP_003065071.1		YP_003065234.1	FolC bifunctional protein	YP_004062533.1
YP_004062648.1	transketolase [Candidatus	YP_003065068.1		YP_003065233.1	acetyl-CoA carboxylase subunit	YP_004062532.1
YP_004062649.1	Glyceraldehyde 3-Phosphate	YP_003065067.1		YP_003065232.2	dephospho-CoA kinase	YP_004062531.1
YP_004062650.1	phosphoglycerate kinase	YP_003065066.1		YP_003065231.1	DNA polymerase III subunit	YP_004062530.1
YP_004062651.1	fructose-bisphosphate aldolase	YP_003065065.1		YP_003065228.1	hypothetical protein	YP_004062528.1
YP_004062652.1	hypothetical protein CKC_02065	YP_003065063.1		YP_003065227.1	DNA gyrase subunit B	YP_004062526.1
YP_004062654.1	nicotinic acid mononucleotide	YP_003065062.1		YP_003065226.1	Maf-like protein [Candidatus	YP_004062525.1
YP_004062655.1	GTPase ObgE [Candidatus	YP_003065061.1		YP_003065225.1	uroporphyrinogen decarboxylase	YP_004062524.1
YP_004062656.1	50S ribosomal protein L27	YP_003065060.1		YP_003065224.1	hypothetical protein	YP_004062523.1
YP_004062657.1	50S ribosomal protein L21	YP_003065059.1		YP_003065223.1	transcription termination	YP_004062522.1
YP_004062659.1	molecular chaperone protein	YP_003065051.1		YP_003065222.1	tRNA modification GTPase TrmE	YP_004062521.1
YP_004062660.1	molecular chaperone DnaK	YP_003065050.2		YP_003065221.1	tRNA uridine	YP_004062520.1
YP_004062661.1	ribonuclease D [Candidatus	YP_003065049.1		YP_003065220.1	glucose-inhibited division	YP_004062519.1
YP_004062662.1	hypothetical protein CKC_02115	YP_003065048.1		YP_003065219.1	chromosome partitioning	YP_004062518.1
YP_004062663.1	hypothetical protein CKC_02120	YP_003064779.2		YP_003065218.1	chromosome partitioning	YP_004062517.1
YP_004062664.1	UTP-glucose-1-phosphate	YP_003064778.1		YP_003065217.1	DNA polymerase III subunit	YP_004062516.1
YP_004062665.1	ferredoxin-NADP+ reductase	YP_003064776.1		YP_003065216.1	hypothetical protein	YP_004062514.1
YP_004062666.1	Na+/H+ antiporter NhaA	YP_003064775.2		YP_003065215.1	leucyl-tRNA synthetase	YP_004062513.1
YP_004062667.1	ribosomal protein L32	YP_003064774.1		YP_003065214.1	hypothetical protein	YP_004062512.1
YP_004062668.1	protoheme IX	YP_003064773.1		YP_003065213.1	hypothetical protein	YP_004062511.1
YP_004062669.1	GTP cyclohydrolase II protein	YP_003064772.1		YP_003065212.1	DNA translocase FtsK	YP_004062510.1
YP_004062670.1	Cytidine/deoxycytidylate	YP_003064771.2		YP_003065211.1	possible lolA type protein	YP_004062509.1
YP_004062671.1	putative ribosomal large	YP_003064819.1		YP_003065210.1	hypothetical protein	YP_004062508.1
YP_004062672.1	hypothetical protein CKC_02165	YP_003064818.1		YP_003065209.1	ribonuclease H [Candidatus	YP_004062507.1
YP_004062673.1	inositol monophosphatase	YP_003064817.1		YP_003065208.1	homoserine kinase [Candidatus	YP_004062506.1
YP_004062674.1	hypothetical protein CKC_02175	YP_003064816.1		YP_003065207.1	tryptophanyl-tRNA synthetase	YP_004062505.1
YP_004062675.1		YP_003064815.1		YP_003065206.1	integral membrane protein MviN	YP_004062504.1
YP_004062676.1	tetraacyldisaccharide	YP_003064814.1		YP_003065205.2	aminopeptidase protein	YP_004062503.1
YP_004062677.1	hypothetical protein CKC_02190	YP_003064813.1		YP_003065204.1	exodeoxyribonuclease VII large	YP_004062502.1
YP_004062678.1	DNA mismatch repair protein	YP_003064812.1		YP_003065203.1	hypothetical protein	YP_004062501.1
YP_004062679.1	dimethyladenosine transferase	YP_003064811.1		YP_003065202.1	hypothetical protein	YP_004062500.1
YP_004062680.1	4-hydroxythreonine-4-phosphate	YP_003064810.1		YP_003065201.1	transcription elongation	YP_004062499.1
YP_004062681.1	peptidyl-prolyl cis-trans	YP_003064809.1		YP_003065200.1	translation initiation factor	YP_004062498.1
YP_004062682.1	organic solvent tolerance	YP_003064808.1		YP_003065199.1	ribosome-binding factor A	YP_004062497.1
YP_004062683.1	putative permease protein	YP_003064807.2		YP_003065198.1	30S ribosomal protein S15	YP_004062496.1
YP_004062684.1	permease protein [Candidatus	YP_003064806.2		YP_003065197.1	polynucleotide	YP_004062495.1
YP_004062685.1	leucyl aminopeptidase	YP_003064805.1		YP_003065196.1	transcription regulator	YP_004062494.1
YP_004062686.1	DNA polymerase III subunit chi	YP_003064804.1		YP_003065195.1	succinyl-diaminopimelate	YP_004062488.1
YP_004062687.1	nucleoside diphosphate kinase	YP_003064803.1		YP_003065194.1		YP_004062487.1
YP_004062688.1	hypothetical protein CKC_02245	YP_003064801.1		YP_003065193.1	histidine triad (HIT) protein	YP_004062486.1
YP_004062689.1	C4-dicarboxylate transporter	YP_003064800.1		YP_003065192.1	30S ribosomal protein S2	YP_004062485.1
YP_004062690.1	Type I secretion membrane	YP_003064799.1		YP_003065191.1	elongation factor Ts	YP_004062484.1
YP_004062691.1	Type I secretion system	YP_003064798.2		YP_003065190.1	uridylate kinase [Candidatus	YP_004062483.1
YP_004062692.1	serralysin [Candidatus	YP_003064797.1		YP_003065189.1	ribosome recycling factor	YP_004062482.1
YP_004062693.1	endonuclease III [Candidatus	YP_003064796.1		YP_003065188.1	undecaprenyl diphosphate	YP_004062481.1
YP_004062695.1	ATP dependent RNA helicase	YP_003064795.1		YP_003065187.1	phosphatidate	YP_004062480.1
YP_004062696.1	Peptidase M23 [Candidatus	YP_003065096.1		YP_003065186.1	zinc metallopeptidase	YP_004062479.1
YP_004062697.1	stationary phase survival	YP_003065094.2		YP_003065185.1	surface antigen (D15)	YP_004062478.1
YP_004062698.1	seryl-tRNA synthetase	YP_003065093.1		YP_003065184.1	UDP-3-O-[3-hydroxymyristoyl]	YP_004062477.1
YP_004062701.1	hypothetical protein CKC_02310	YP_003065090.1		YP_003065183.1	(3R)-hydroxymyristoyl-ACP	YP_004062476.1
YP_004062702.1	lipoyl synthase [Candidatus	YP_003065089.1		YP_003065182.2	UDP-N-acetylglucosamine	YP_004062475.1
YP_004062703.1	dihydrolipoamide dehydrogenase	YP_003065088.1		YP_003065181.1	hypothetical protein	YP_004062474.1
YP_004062704.1	pyruvate dehydrogenase complex	YP_003065087.1		YP_003065180.1	lipid-A-disaccharide synthase	YP_004062473.1
YP_004062705.1	pyruvate dehydrogenase subunit	YP_003065086.1		YP_003065179.1	recombination protein F	YP_004062472.1
YP_004062706.1	dehydrogenase, E1 component	YP_003065085.2		YP_003065178.1	3-deoxy-manno-octulosonate	YP_004062471.1
YP_004062707.1	putative cell division protein	YP_003065084.1		YP_003065177.1	hypothetical protein	YP_004062470.1
YP_004062708.1	phosphopyruvate hydratase	YP_003065083.1		YP_003065176.1	hypothetical protein	YP_004062467.1
YP_004062709.1		YP_003065082.1		YP_003065175.1	recombination protein RecR	YP_004062466.1
YP_004062711.1	type II citrate synthase	YP_003064768.1		YP_003065174.1	probable FAD-dependent	YP_004062465.1
YP_004062712.1	DNA topoisomerase IV subunit A	YP_003064766.1		YP_003065173.1	hypothetical protein	YP_004062464.1
YP_004062713.1	delta-aminolevulinic acid	YP_003064765.2		YP_003065171.1	hypothetical protein	YP_004062410.1
YP_004062714.1	MarR family transcriptional	YP_003064764.1		YP_003065170.1	glycyl-tRNA synthetase subunit	YP_004062409.1
YP_004062715.1	hypothetical protein CKC_02390	YP_003064763.1		YP_003065169.2	methyltransferase protein	YP_004062408.1
YP_004062716.1	serine	YP_003064762.1		YP_003065168.1	octaprenyl-diphosphate	YP_004062407.1
YP_004062717.1		YP_003064761.1		YP_003065167.1	inorganic	YP_004062406.1
YP_004062718.1	riboflavin synthase subunit	YP_003064760.1		YP_003065166.1	peptide chain release factor 2	YP_004062405.1
YP_004062719.1	riboflavin synthase subunit	YP_003064759.1		YP_003065165.1	penicillin binding	YP_004062404.1
YP_004062720.1	transcription antitermination	YP_003064758.1		YP_003065164.1	ribonuclease E [Candidatus	YP_004062403.1
YP_004062721.1	7-cyano-7-deazaguanine	YP_003064757.1		YP_003065163.1	DNA mismatch repair protein	YP_004062402.1
YP_004062722.1	probable cation efflux protein	YP_003064756.1		YP_003065162.1	lipoprotein signal peptidase	YP_004062401.1
YP_004062723.1	substrate-binding region of	YP_003064755.1		YP_003065161.1	integration host factor, beta	YP_004062400.1
YP_004062724.1	proline/glycine betaine ABC	YP_003064754.1		YP_003065160.1	putative protease IV	YP_004062399.1
YP_004062725.1	proline/glycine betaine ABC	YP_003064753.1		YP_003065159.1	hypothetical protein	YP_004062398.1
YP_004062726.1	oxidoreductase protein	YP_003064750.1		YP_003065158.1	OstA family protein	YP_004062397.1
YP_004062727.1	amidophosphoribosyltransferase	YP_003064749.1		YP_003065157.1	ABC transporter nucleotide	YP_004062396.1
YP_004062728.1	colicin V production protein	YP_003064748.1		YP_003065156.1	putative uracil-DNA	YP_004062395.1
YP_004062730.1	DNA repair protein RadA	YP_003064747.1		YP_003065155.1	hypothetical protein	YP_004062394.1
YP_004062731.1	alanine racemase [Candidatus	YP_003064746.1		YP_003065154.1	carboxynorspermidine	YP_004062393.1
YP_004062732.1	replicative DNA helicase	YP_003064745.1		YP_003065153.1	peptidase S16 lon domain	YP_004062392.1
YP_004062733.1	50S ribosomal protein L9	YP_003064744.1		YP_003065152.1	hypothetical protein	YP_004062391.1
YP_004062734.1	30S ribosomal protein S18	YP_003064743.1		YP_003065151.2	hypothetical protein	YP_004062390.1
YP_004062735.1	30S ribosomal protein S6	YP_003064742.1		YP_003065146.1	hypothetical protein	YP_004062385.1
YP_004062736.1	UDP-glucose 4-epimerase	YP_003064741.1		YP_003065145.1	hypothetical protein	YP_004062386.1
YP_004062737.1	preprotein translocase subunit	YP_003064740.1		YP_003065142.1	peptidase A24A prepilin type	YP_004062382.1
YP_004062738.1	bifunctional ornithine	YP_003064739.1		YP_003065141.1	pilus assembly protein	YP_004062381.1
YP_004062739.1	mutator MutT protein	YP_003064738.1		YP_003065140.1	putative pilus assembly	YP_004062380.1
YP_004062740.1	hypothetical protein CKC_02515	YP_003064737.1		YP_003065139.2	hypothetical protein	YP_004062379.1
YP_004062741.1	ATP/ADP translocase	YP_003064736.1		YP_003065138.1	response regulator receiver	YP_004062378.1
YP_004062742.1	SAM-dependent	YP_003064735.1		YP_003065137.1	component of type IV pilus	YP_004062377.1
YP_004062743.1	GTP-binding protein LepA	YP_003064734.1		YP_003065136.1	hypothetical protein	YP_004062376.1
YP_004062745.1	translation initiation factor	YP_003064733.1		YP_003065135.1	pilus assembly protein	YP_004062376.1
YP_004062746.1	50S ribosomal protein L35	YP_003064732.1		YP_003065134.1	pilus component protein	YP_004062375.1
YP_004062747.1	ribosomal protein L20	YP_003064731.1		YP_003065133.1	Ferroxidase [Candidatus	YP_004062374.1
YP_004062748.1	phenylalanyl-tRNA synthetase,	YP_003064730.1		YP_003065132.1	zinc uptake ABC transporter,	YP_004062373.1
YP_004062749.1	phenylalanyl-tRNA synthetase	YP_003064729.1		YP_003065131.1	putative high-affinity zinc	YP_004062372.1
YP_004062750.1	outer membrane protein	YP_003064727.1		YP_003065130.1	zinc uptake ABC transporter	YP_004062371.1
YP_004062751.1	ribosomal RNA	YP_003064726.1		YP_003065129.1	6-phosphogluconate	YP_004062370.1
YP_004062753.1	response regulator receiver	YP_003064725.1		YP_003065128.1	50S ribosomal protein L19	YP_004062369.1
YP_004062754.1	hypothetical protein CKC_02585	YP_003064724.1		YP_003065127.1	tRNA	YP_004062368.1
YP_004062755.1	competence protein F, putative	YP_003064723.1		YP_003065126.1	16S rRNA-processing protein	YP_004062367.1
YP_004062756.1	putative membrane-bound lytic	YP_003064721.1		YP_003065125.1	30S ribosomal protein S16	YP_004062366.1
YP_004062757.1	putative membrane-bound lytic	YP_003064721.1		YP_003065124.1	signal recognition particle	YP_004062365.1
YP_004062758.1	aspartate-semialdehyde	YP_003064720.1		YP_003065123.1	diaminopimelate epimerase	YP_004062364.1
YP_004062759.1	DNA topoisomerase I	YP_003064719.1		YP_003065122.1	cell division protein	YP_004062363.1
YP_004062761.1	hypothetical protein CKC_02620	YP_003064716.1		YP_003065121.1	intracellular septation	YP_004062362.1
YP_004062762.1	putative glycerol-3-phosphate	YP_003064715.1		YP_003065120.1	putative phosphate-binding	YP_004062361.1
YP_004062763.1	dihydroorotase [Candidatus	YP_003064714.1		YP_003065119.2	ABC transporter, membrane	YP_004062360.1
YP_004062764.1	aspartate carbamoyltransferase	YP_003064713.1		YP_003065118.1	phosphate ABC transporter,	YP_004062359.1
YP_004062765.1	acyl-CoA dehydrogenase protein	YP_003064712.1		YP_003065117.1	ABC transporter, nucleotide	YP_004062358.1
YP_004062766.1	flagellin domain-containing	YP_003064944.1		YP_003065116.1	putative phosphate transport	YP_004062357.1
YP_004062767.1	hypothetical protein CKC_02650	YP_003064943.1		YP_003065115.2	heat shock protein [Candidatus	YP_004062356.1
YP_004062768.1	flagellar motor protein MotB	YP_003064942.1		YP_003065114.1	putative two-component sensor	YP_004062355.1
YP_004062769.1	flagellar motor protein MotB	YP_003064942.1		YP_003065113.1	serine protease DO-like	YP_004062354.1
YP_004062770.1	chemotaxis protein [Candidatus	YP_003064941.1		YP_003065112.1	hypothetical protein	YP_004062353.1
YP_004062771.1	hypothetical protein CKC_02670	YP_003064940.1		YP_003065111.1	D-alanyl-D-alanine	YP_004062352.1
YP_004062772.1	putative transcription	YP_003064939.1		YP_003065110.1	large conductance	YP_004062351.1
YP_004062773.1	flagellar hook protein FlgE	YP_003064938.1		YP_003065109.1	glutathione synthetase	YP_004062350.1
YP_004062774.1	flagellar hook-associated	YP_003064937.1		YP_003065108.1	flagellar MS-ring protein	YP_004062349.1
YP_004062775.1	flagellar hook-associated	YP_003064936.1		YP_003065107.1	probable transcriptional	YP_004062348.1
YP_004062776.1	flagellar biosynthesis	YP_003064935.1		YP_003065106.1	transcriptional regulator	YP_004062347.1
YP_004062777.1	flagellar biosynthesis	YP_003064934.1		YP_003065103.1	flagellar biosynthesis protein	YP_004062346.1
YP_004062778.1	flagellar basal body rod	YP_003064933.1		YP_003065102.1	flagellar motor switch protein	YP_004062345.1
YP_004062779.1	flagellar biosynthesis protein	YP_003064932.1		YP_003065101.1	putative flagellar motor	YP_004062344.1
YP_004062780.1	flagellar biosynthesis protein	YP_003064925.1		YP_003065100.1	flagellar C-ring protein	YP_004062343.1
YP_004062781.1	flagellar biosynthesis protein	YP_003064924.1		YP_003065099.2	flagellar motor protein MotA	YP_004062342.1
YP_004062782.1	hypothetical protein CKC_02725	YP_003064923.1		YP_003065098.1	flagellar basal body rod	YP_004062341.1
YP_004062783.1	hypothetical protein CKC_02730	YP_003064922.1		YP_003065097.1	flagellum-specific ATP	YP_004062340.1
YP_004062784.1	hypothetical protein CKC_02735	YP_003064921.1		YP_003065096.1	lipoprotein [Candidatus	YP_004062696.1
YP_004062785.1	hypothetical protein CKC_02740	YP_003064920.1		YP_003065095.1	hypothetical protein	YP_004062696.1
YP_004062786.1	methylenetetrahydrofolate	YP_003064919.1		YP_003065094.2	stationary phase survival	YP_004062697.1
YP_004062787.1	6-phosphogluconolactonase	YP_003064918.1		YP_003065093.1	seryl-tRNA synthetase	YP_004062698.1
YP_004062788.1	glucose-6-phosphate	YP_003064917.1		YP_003065090.1	hypothetical protein	YP_004062701.1
YP_004062789.1	putative glutamine synthetase	YP_003064916.1		YP_003065089.1	lipoyl synthase [Candidatus	YP_004062702.1
YP_004062790.1	ribonucleotide-diphosphate	YP_003065377.1		YP_003065088.1	dihydrolipoamide dehydrogenase	YP_004062703.1
YP_004062792.1	hypothetical protein CKC_02775	YP_003065612.1		YP_003065087.1	pyruvate dehydrogenase complex	YP_004062704.1
YP_004062796.1	hypothetical protein CKC_02795	YP_003084345.1		YP_003065086.1	pyruvate dehydrogenase subunit	YP_004062705.1
YP_004062800.1	ribonucleotide-diphosphate	YP_003064915.1		YP_003065085.2	dehydrogenase, E1 component	YP_004062706.1
YP_004062802.1	hypothetical protein CKC_02825	YP_003064913.1		YP_003065084.1	putative cell division protein	YP_004062707.1
YP_004062803.1	hypothetical protein CKC_02830	YP_003064912.1		YP_003065083.1	phosphopyruvate hydratase	YP_004062708.1
YP_004062804.1	putative glycerol-3-phosphate	YP_003064911.1		YP_003065082.1		YP_004062709.1
YP_004062805.1	3-oxoacyl-(acyl carrier	YP_003064910.1		YP_003065079.1	Fmu (Sun) domain protein	YP_004062640.1
YP_004062806.1	integration host factor	YP_003064909.1		YP_003065077.1	bifunctional	YP_004062641.1
YP_004062807.1	superoxide dismutase	YP_003064908.1		YP_003065076.1	carbonate dehydratase	YP_004062642.1
YP_004062808.1	cation diffusion facilitator	YP_003064907.1		YP_003065075.1	NAD-glutamate dehydrogenase	YP_004062643.1
YP_004062811.1	hypothetical protein CKC_02870	YP_003065612.1		YP_003065074.1	exonuclease I [Candidatus	YP_004062644.1
YP_004062817.1	phage-related lysozyme	YP_003065469.1		YP_003065073.1	hypothetical protein	YP_004062645.1
YP_004062818.1		YP_003064906.1		YP_003065072.1	hypothetical protein	YP_004062646.1
YP_004062819.1	hypothetical protein CKC_02910	YP_003065244.1		YP_003065071.1	5-formyltetrahydrofolate	YP_004062647.1
YP_004062820.1	putative potassium uptake	YP_003065245.1		YP_003065068.1	transketolase [Candidatus	YP_004062648.1
YP_004062821.1	hypothetical protein CKC_02920	YP_003064641.1		YP_003065067.1	Glyceraldehyde 3-Phosphate	YP_004062649.1
YP_004062822.1		YP_003064640.1		YP_003065066.1	phosphoglycerate kinase	YP_004062650.1
YP_004062823.1	translation-associated GTPase	YP_003064639.1		YP_003065065.1	Fructose-bisphosphate aldolase	YP_004062651.1
YP_004062824.1	peptidyl-tRNA hydrolase	YP_003064638.1		YP_003065063.1	hypothetical protein	YP_004062652.1
YP_004062825.1	hypothetical protein CKC_02940	YP_003064637.1		YP_003065062.1	nicotinic acid mononucleotide	YP_004062654.1
YP_004062826.1	ABC transporter permease	YP_003064636.1		YP_003065061.1	GTPase ObgE [Candidatus	YP_004062655.1
YP_004062827.1	DNA topoisomerase IV subunit B	YP_003064635.1		YP_003065060.1	50S ribosomal protein L27	YP_004062656.1
YP_004062828.1	thymidylate kinase [Candidatus	YP_003064631.1		YP_003065059.1	50S ribosomal protein L21	YP_004062657.1
YP_004062829.1	DNA polymerase III subunit	YP_003064630.1		YP_003065051.1	molecular chaperone protein	YP_004062659.1
YP_004062830.1	methionyl-tRNA synthetase	YP_003064629.2		YP_003065050.2	molecular chaperone DnaK	YP_004062660.1
YP_004062831.1	hypothetical protein CKC_02970	YP_003064628.1		YP_003065049.1	ribonuclease D [Candidatus	YP_004062661.1
YP_004062832.1	metal-dependent hydrolase	YP_003064627.1		YP_003065048.1	hypothetical protein	YP_004062662.1
YP_004062833.1	hypothetical protein CKC_02980	YP_003065612.1		YP_003065047.1	NOL1/NOP2/SUN family signature	YP_004062322.1
YP_004062835.1	phage-related lysozyme	YP_003065469.1		YP_003065046.1	creatinine amidohydrolase	YP_004062321.1
YP_004062836.1	hypothetical protein CKC_02995	YP_003065347.1		YP_003065043.1	ribonuclease PH [Candidatus	YP_004062320.1
YP_004062837.1	rare lipoprotein A [Candidatus	YP_003065348.1		YP_003065042.1	putative deoxyribonucleotide	YP_004062319.1
YP_004062838.1	hypothetical protein CKC_03005	YP_003065349.1		YP_003065041.1	coproporphyrinogen III oxidase	YP_004062318.1
YP_004062839.1	DNA-directed RNA polymerase	YP_003065350.1		YP_003065040.1	chromosomal replication	YP_004062317.1
YP_004062840.1	4'-phosphopantetheinyl	YP_003065351.1		YP_003065039.1	30S ribosomal protein S20	YP_004062316.1
YP_004062841.1	type I signal peptidase	YP_003065352.1		YP_003065038.1	formamidopyrimidine-DNA	YP_004062315.1
YP_004062842.1	ribonuclease III [Candidatus	YP_003065353.1		YP_003065037.1	ubiquinone/menaquinone	YP_004062314.1
YP_004062843.1	GTP-binding protein Era	YP_003065354.1		YP_003065036.1	2-polyprenylphenol	YP_004062313.1
YP_004062844.1	UDP-N-acetylglucosamine	YP_003065355.1		YP_003065035.1	bifunctional	YP_004062312.1
YP_004062845.1		YP_003065356.1		YP_003065034.1	small heat shock protein	YP_004062311.1
YP_004062846.1	hypothetical protein CKC_03045	YP_003065357.1		YP_003065033.1	iron-responsive	YP_004062310.1
YP_004062847.1	ATP-dependent DNA helicase	YP_003065358.1		YP_003065032.1	primosome assembly protein	YP_004062309.1
YP_004062848.1	hypothetical protein CKC_03055	YP_003065359.1		YP_003065031.1	F0F1 ATP synthase subunit	YP_004062307.1
YP_004062849.1	transcription-repair coupling	YP_003065360.1		YP_003065030.1	F0F1 ATP synthase subunit	YP_004062306.1
YP_004062850.1	DNA repair protein RecO	YP_003065361.1		YP_003065029.1	F0F1 ATP synthase subunit	YP_004062305.1
YP_004062851.1	tyrosyl-tRNA synthetase	YP_003065362.1		YP_003065028.1	F0F1 ATP synthase subunit beta	YP_004062304.1
YP_004062852.1	hypothetical protein CKC_03075	YP_003065363.2		YP_003065027.1	F0F1 ATP synthase subunit	YP_004062303.1
YP_004062860.1	exsB protein [Candidatus	YP_003065444.1		YP_003065026.1	adenylosuccinate synthetase	YP_004062302.1
YP_004062861.1	hypothetical protein CKC_03120	YP_003065445.1		YP_003065025.1	putative transmembrane protein	YP_004062301.1
YP_004062862.1	HemY domain-containing protein	YP_003065446.1		YP_003065024.1	RNA polymerase factor sigma-32	YP_004062300.1
YP_004062863.1	hypothetical protein CKC_03130	YP_003065447.1		YP_003065023.1	RNA-pseudouridylate synthase	YP_004062299.1
YP_004062864.1	uroporphyrinogen-III synthase	YP_003065448.2		YP_003065022.2	putative phosphoesterase	YP_004062298.1
YP_004062865.1	porphobilinogen deaminase	YP_003065450.1		YP_003065021.1	ribosomal large subunit	YP_004062297.1
YP_004062866.1	putative DNA-binding/iron	YP_003065451.1		YP_003065019.1	cell division protein	YP_004062296.1
YP_004062867.1	putative glycerol-3-phosphate	YP_003065452.1		YP_003065018.1	putative aminopeptidase	YP_004062295.1
YP_004062868.1	hypothetical protein CKC_03155	YP_003065453.1		YP_003065017.1	5-aminolevulinate synthase	YP_004062294.1
YP_004062869.1	succinate dehydrogenase	YP_003065454.1		YP_003065016.1	tRNA/rRNA methyltransferase	YP_004062293.1
YP_004062870.1	succinate dehydrogenase	YP_003065455.1		YP_003065015.1	aspartate aminotransferase	YP_004062292.1
YP_004062871.1	succinate dehydrogenase	YP_003065456.1		YP_003065014.1	ATP-dependent RNA helicase	YP_004062290.1
YP_004062872.1	succinate dehydrogenase	YP_003065457.1		YP_003065013.1		YP_004062289.1
YP_004062873.1	outer membrane lipoprotein	YP_003065458.1		YP_003065012.2	excinuclease ABC subunit C	YP_004062288.1
YP_004062874.1	AFG1-family ATPase [Candidatus	YP_003065460.1		YP_003065011.1	outer membrane protein	YP_004062287.1
YP_004062875.1	malate dehydrogenase	YP_003065461.1		YP_003065010.2	ABC transporter permease	YP_004062286.1
YP_004062876.1	succinyl-CoA synthetase	YP_003065462.1		YP_003065009.1	ABC transporter nucleotide	YP_004062285.1
YP_004062877.1	succinyl-CoA synthetase	YP_003065463.1		YP_003065008.1	nucleoside-diphosphate-sugar	YP_004062284.1
YP_004062878.1	alpha-ketoglutarate	YP_003065464.1		YP_003065007.1	Glutathione S-transferase	YP_004062283.1
YP_004062879.1	dihydrolipoamide	YP_003065465.1		YP_003065006.1	undecaprenyl pyrophosphate	YP_004062282.1
YP_004062880.1	dihydrolipoamide dehydrogenase	YP_003065466.1		YP_003065005.1	TPR repeat-containing protein	YP_004062281.1
YP_004062881.1	ribose-5-phosphate isomerase A	YP_003065467.1		YP_003065004.1	aminomethyltransferase protein	YP_004062273.1
YP_004062882.1	glutathione reductase	YP_003065468.1		YP_003065003.1	hypothetical protein	YP_004062272.1
YP_004062883.1	cysteine desulfurase activator	YP_003065472.1		YP_003065002.1	hypothetical protein	YP_004062271.1
YP_004062884.1	ABC transporter, nucleotide	YP_003065473.1		YP_003065001.1	acetyl-CoA carboxylase	YP_004062270.1
YP_004062885.1	putative iron-sulfur cluster	YP_003065474.1		YP_003065000.2	site-specific tyrosine	YP_004062269.1
YP_004062886.1	putative iron-sulfur cluster	YP_003065474.1		YP_003064999.1	BolA family protein	YP_004062267.1
YP_004062891.1	putative aminotransferase	YP_003065475.1		YP_003064998.1	molecular chaperone DnaJ	YP_004062266.1
YP_004062892.1	hypothetical protein CKC_03275	YP_003065476.1		YP_003064997.1	50S ribosomal protein L28	YP_004062265.1
YP_004062893.1	FeS assembly scaffold SufA	YP_003065477.1		YP_003064996.1	glyoxalase II [Candidatus	YP_004062264.1
YP_004062894.1	hypothetical protein CKC_03285	YP_003065411.1		YP_003064995.1	Methyltransferase type 11	YP_004062263.1
YP_004062895.1	NAD synthetase [Candidatus	YP_003065412.1		YP_003064993.2	1-acyl-sn-glycerol-3-phosphate	YP_004062262.1
YP_004062896.1	threonyl-tRNA synthetase	YP_003065417.1		YP_003064992.1	hypothetical protein	YP_004062261.1
YP_004062897.1	cold shock protein [Candidatus	YP_003065326.1		YP_003064991.1	phosphatidylserine synthase	YP_004062260.1
YP_004062898.1	hypothetical protein CKC_03305	YP_003065420.1		YP_003064990.1	phosphatidylserine	YP_004062259.1
YP_004062899.1	cell division protein MraZ	YP_003065519.1		YP_003064989.1	ABC transporter related	YP_004062258.1
YP_004062900.1	S-adenosyl-methyltransferase	YP_003065518.2		YP_003064988.1	hypothetical protein	YP_004062257.1
YP_004062901.1	hypothetical protein CKC_03320	YP_003065517.1		YP_003064986.1	cysteinyl-tRNA synthetase	YP_004062256.1
YP_004062902.1	penicillin-binding	YP_003065516.1		YP_003064985.1	hypothetical protein	YP_004062255.1
YP_004062903.1		YP_003065515.1		YP_003064984.1	hypothetical protein	YP_004062254.1
YP_004062904.1		YP_003065514.1		YP_003064983.1	phosphoribosylglycinamide	YP_004062252.1
YP_004062905.1		YP_003065513.1		YP_003064982.1	phosphoribosylaminoimidazole	YP_004062251.1
YP_004062906.1		YP_003065512.1		YP_003064980.1	hypothetical protein	YP_004062250.1
YP_004062907.1	cell division protein FtsW	YP_003065511.1		YP_003064978.1	hypothetical protein	YP_004062248.1
YP_004062908.1	N-acetylglucosaminyl	YP_003065510.1		YP_003064975.1	hypothetical protein	YP_004062245.1
YP_004062909.1		YP_003065509.1		YP_003064974.1	thiamine transporter substrate	YP_004062244.1
YP_004062910.1		YP_003065508.1		YP_003064973.2	thiamine transporter membrane	YP_004062243.1
YP_004062913.1	hypothetical protein CKC_03380	YP_003065619.1		YP_003064972.1	thiamine transporter	YP_004062242.1
YP_004062917.1	glycyl-tRNA synthetase subunit	YP_003065507.1		YP_003064971.1	hypothetical protein	YP_004062241.1
YP_004062918.1	hypothetical protein CKC_03405	YP_003065506.1		YP_003064970.1	dinucleoside polyphosphate	YP_004062240.1
YP_004062919.1	putative	YP_003065504.1		YP_003064967.1	Holliday junction resolvase	YP_004063370.1
YP_004062921.1	F0F1 ATP synthase subunit A	YP_003065501.1		YP_003064966.1	Holliday junction DNA helicase	YP_004063369.1
YP_004062922.1	H+transporting two-sector	YP_003065500.1		YP_003064965.1	Holliday junction DNA helicase	YP_004063368.1
YP_004062923.1	F0F1 ATP synthase subunit B'	YP_003065499.1		YP_003064964.1	tolQ protein [Candidatus	YP_004063367.1
YP_004062924.1	F0F1 ATP synthase subunit B	YP_003065498.1		YP_003064962.1	signal peptide protein	YP_004063366.1
YP_004062950.1	hypothetical protein CKC_03565	YP_003065493.1		YP_003064961.1	translocation protein TolB	YP_004063365.1
YP_004062951.1	diguanylate cyclase	YP_003065492.1		YP_003064960.1	OmpA/MotB [Candidatus	YP_004063364.1
YP_004062952.1	hypothetical protein CKC_03575	YP_003065491.1		YP_003064959.1	hypothetical protein	YP_004063363.1
YP_004062953.1	ribonuclease HII [Candidatus	YP_003065489.1		YP_003064958.1	metalloprotease [Candidatus	YP_004063362.1
YP_004062954.1	uracil-DNA glycosylase	YP_003065487.1		YP_003064957.1	phosphoglucosamine mutase	YP_004063361.1
YP_004062956.1	coproporphyrinogen III oxidase	YP_003065486.1		YP_003064956.1	NADH dehydrogenase [Candidatus	YP_004063360.1
YP_004062961.1	phosphoglucomutase [Candidatus	YP_003065520.1		YP_003064955.1	hypothetical protein	YP_004063359.1
YP_004062962.1	von Willebrand factor type A	YP_003065521.1		YP_003064953.1	ABC transporter, membrane	YP_004063358.1
YP_004062967.1	hypothetical protein CKC_03650	YP_003065522.1		YP_003064952.1	ABC transporter, membrane	YP_004063357.1
YP_004062968.1	von Willebrand factor type A	YP_003065523.1		YP_003064951.1	ABC transporter, nucleotide	YP_004063356.1
YP_004062969.1	geranyltranstransferase	YP_003065524.1		YP_003064950.1	periplasmic solute binding	YP_004063355.1
YP_004062970.1	putative amino acid-binding	YP_003065525.1		YP_003064949.1	acyl-carrier-protein	YP_004063354.1
YP_004062971.1	amino acid ABC transporter	YP_003065526.1		YP_003064948.1		YP_004063353.1
YP_004062972.1	glycosyl transferase family	YP_003065527.1		YP_003064947.1	acyl carrier protein	YP_004063352.1
YP_004062973.1	hypothetical protein CKC_03680	YP_003065406.1		YP_003064946.1	3-oxoacyl-(acyl carrier	YP_004063351.1
YP_004062974.1	acyl-CoA hydrolase [Candidatus	YP_003065405.1		YP_003064945.1	aminodeoxychorismate lyase	YP_004063350.1
YP_004062975.1	excinuclease ABC subunit B	YP_003065404.1		YP_003064944.1	flagellin domain-containing	YP_004062766.1
YP_004062976.1	hypothetical protein CKC_03695	YP_003065422.1		YP_003064943.1	hypothetical protein	YP_004062767.1
YP_004062977.1	hypothetical protein CKC_03700	YP_003065631.1		YP_003064942.1	flagellar motor protein MotB	YP_004062769.1
YP_004062978.1	hypothetical protein CKC_03705	YP_003065632.1		YP_003064941.1	chemotaxis protein [Candidatus	YP_004062770.1
YP_004062980.1	hypothetical protein CKC_03715	YP_003065637.1		YP_003064940.1	hypothetical protein	YP_004062771.1
YP_004062981.1	P4 family phage/plasmid	YP_003065638.1		YP_003064939.1	putative transcription	YP_004062772.1
YP_004062982.1	P4 family phage/plasmid	YP_003065638.1		YP_003064938.1	flagellar hook protein FlgE	YP_004062773.1
YP_004062986.1	phosphoserine phosphatase SerB	YP_003065373.1		YP_003064937.1	flagellar hook-associated	YP_004062774.1
YP_004062987.1	phage-related lysozyme	YP_003065469.1		YP_003064936.1	flagellar hook-associated	YP_004062775.1
YP_004062988.1	putative hydrolase serine	YP_003065372.1		YP_003064935.1	flagellar biosynthesis	YP_004062776.1
YP_004062989.1	HflK protein [Candidatus	YP_003065371.1		YP_003064934.1	flagellar biosynthesis	YP_004062777.1
YP_004062990.1	dihydrofolate reductase	YP_003065370.1		YP_003064933.1	flagellar basal body rod	YP_004062778.1
YP_004062991.1	thymidylate synthase	YP_003065369.1		YP_003064932.1	flagellar biosynthesis protein	YP_004062779.1
YP_004062992.1	hypothetical protein CKC_03775	YP_003065368.1		YP_003064925.1	flagellar biosynthesis protein	YP_004062780.1
YP_004062993.1	hypothetical protein CKC_03780	YP_003065367.1		YP_003064924.1	flagellar biosynthesis protein	YP_004062781.1
YP_004062994.1	OmpA/MotB [Candidatus	YP_003065366.1		YP_003064923.1	hypothetical protein	YP_004062782.1
YP_004062995.1	DNA helicase II [Candidatus	YP_003065365.1		YP_003064922.1	hypothetical protein	YP_004062783.1
YP_004062996.1	hypothetical protein CKC_03795	YP_003065435.1		YP_003064921.1	hypothetical protein	YP_004062784.1
YP_004062997.1	hydroxymethylglutaryl-coenzyme	YP_003065434.2		YP_003064920.1	hypothetical protein	YP_004062785.1
YP_004062998.1	isopentenyl pyrophosphate	YP_003065433.1		YP_003064919.1	methylenetetrahydrofolate	YP_004062786.1
YP_004062999.1	hydroxymethylglutaryl-CoA	YP_003065432.1		YP_003064918.1	6-phosphogluconolactonase	YP_004062787.1
YP_004063000.1	mevalonate kinase [Candidatus	YP_003065431.1		YP_003064917.1	glucose-6-phosphate	YP_004062788.1
YP_004063001.1	mevalonate kinase [Candidatus	YP_003065430.1		YP_003064916.1	putative glutamine synthetase	YP_004062789.1
YP_004063002.1	diphosphomevalonate	YP_003065429.1		YP_003064915.1	ribonucleotide-diphosphate	YP_004062800.1
YP_004063003.1	hypothetical protein CKC_03830	YP_003065428.1		YP_003064913.1	hypothetical protein	YP_004062802.1
YP_004063004.1	hypothetical protein CKC_03835	YP_003065427.1		YP_003064912.1	hypothetical protein	YP_004062803.1
YP_004063005.1	dihydroorotase [Candidatus	YP_003065425.1		YP_003064911.1	putative glycerol-3-phosphate	YP_004062804.1
YP_004063006.1	orotate	YP_003065424.1		YP_003064910.1	3-oxoacyl-(acyl carrier	YP_004062805.1
YP_004063007.1	putative homoserine/homoserine	YP_003065395.1		YP_003064909.1	integration host factor	YP_004062806.1
YP_004063008.1	aspartyl/glutamyl-tRNA	YP_003065392.1		YP_003064908.1	superoxide dismutase	YP_004062807.1
YP_004063009.1	aspartyl/glutamyl-tRNA	YP_003065391.1		YP_003064907.1	cation diffusion facilitator	YP_004062808.1
YP_004063010.1	putative glutamyl-tRNA(Gln)	YP_003065390.1		YP_003064906.1		YP_004062818.1
YP_004063011.1	Holliday junction resolvase	YP_003065389.1		YP_003065244.1	hypothetical protein	YP_004062819.1
YP_004063012.1	hypothetical protein CKC_03875	YP_003065541.1		YP_003065245.1	putative potassium uptake	YP_004062820.1
YP_004063013.1	hypothetical protein CKC_03880	YP_003065542.1		YP_003065246.1	hypothetical protein	YP_004062836.1
YP_004063014.1	hypothetical protein CKC_03885	YP_003065543.1		YP_003065247.1	DNA primase [Candidatus	YP_004063273.1
YP_004063015.1	hypothetical protein CKC_03890	YP_003065544.1		YP_003065248.2	polysialic acid capsule	YP_004063224.1
YP_004063016.1	hypothetical protein CKC_03895	YP_003065546.1		YP_003065254.1	phosphatidylcholine synthase	YP_004063223.1
YP_004063017.1	hypothetical protein CKC_03900	YP_003065547.1		YP_003065255.1	2-octaprenyl-6-methoxyphenyl	YP_004063222.1
YP_004063018.1	hypothetical protein CKC_03905	YP_003065550.1		YP_003065256.1	glucose/galactose transporter	YP_004063221.1
YP_004063020.1	hypothetical protein CKC_03915	YP_003065551.1		YP_003065258.1	ribonucleotide-diphosphate	YP_004062790.1
YP_004063021.1	hypothetical protein CKC_03920	YP_003065552.1		YP_003065259.1	bifunctional riboflavin	YP_004063219.1
YP_004063023.1	hypothetical protein CKC_03930	YP_003065554.1		YP_003065260.1	hypothetical protein	YP_004063218.1
YP_004063024.1	hypothetical protein CKC_03935	YP_003065558.1		YP_003065261.1	co-chaperonin GroES	YP_004063217.1
YP_004063026.1	hypothetical protein CKC_03945	YP_003065559.1		YP_003065262.1	chaperonin GroEL [Candidatus	YP_004063216.1
YP_004063028.1	transcriptional regulator	YP_003065560.1		YP_003065265.1	NADH dehydrogenase subunit A	YP_004063215.1
YP_004063029.1	replicative DNA helicase	YP_003065562.1		YP_003065266.1	NADH dehydrogenase subunit B	YP_004063214.1
YP_004063030.1	hypothetical protein CKC_03965	YP_003065565.1		YP_003065267.1	NADH dehydrogenase subunit C	YP_004063213.1
YP_004063033.1	peptidyl prolyl cis-trans	YP_003065571.1		YP_003065268.1	NADH dehydrogenase subunit D	YP_004063212.1
YP_004063034.1	16S rRNA m3U1498	YP_003065573.1		YP_003065269.1	NADH-quinone oxidoreductase, E	YP_004063211.1
YP_004063035.1	glutamate--cysteine ligase	YP_003065574.1		YP_003065271.1	NADH dehydrogenase I subunit F	YP_004063210.1
YP_004063036.1	GCN5-related	YP_003065575.1		YP_003065272.1	NADH dehydrogenase subunit G	YP_004063208.1
YP_004063037.1	pyridoxamine 5'-phosphate	YP_003065578.1		YP_003065273.1	NADH dehydrogenase subunit H	YP_004063207.1
YP_004063038.1	enoyl-(acyl carrier protein)	YP_003065579.1		YP_003065274.1	NADH dehydrogenase subunit I	YP_004063206.1
YP_004063041.1	tRNA-dihydrouridine synthase A	YP_003065580.1		YP_003065275.1	NADH dehydrogenase subunit J	YP_004063205.1
YP_004063042.1	hypothetical protein CKC_04025	YP_003065595.1		YP_003065277.1	NADH-ubiquinone	YP_004063204.1
YP_004063046.1	hypothetical protein CKC_04045	YP_003065634.1		YP_003065278.1	NADH dehydrogenase subunit L	YP_004063203.1
YP_004063047.1	hypothetical protein CKC_04050	YP_003065634.1		YP_003065279.1	NADH dehydrogenase subunit M	YP_004063202.1
YP_004063049.1	PTS system ascorbate-specific	YP_003065582.1		YP_003065280.1	NADH dehydrogenase subunit N	YP_004063201.1
YP_004063050.1	deoxyribodipyrimidine	YP_003065583.1		YP_003065281.1	birA bifunctional protein	YP_004063200.1
YP_004063052.1	hypothetical protein CKC_04075	YP_003065584.1		YP_003065282.1	beta-lactamase	YP_004063199.1
YP_004063054.1	phage-related lysozyme	YP_003065469.1		YP_003065283.1	prolyl-tRNA synthetase	YP_004063198.1
YP_004063055.1	hypothetical protein CKC_04090	YP_003065612.1		YP_003065284.1	lipoprotein-releasing system	YP_004063196.1
YP_004063056.1	NAD-dependent DNA ligase LigA	YP_003065585.1		YP_003065285.1	3-demethylubiquinone-9	YP_004063195.1
YP_004063057.1	DNA repair protein RecN	YP_003065586.2		YP_003065286.1	aspartate kinase [Candidatus	YP_004063194.1
YP_004063058.1	outer membrane assembly	YP_003065587.1		YP_003065287.1	peptide chain release factor 1	YP_004063193.1
YP_004063059.1	UDP-3-O-[3-hydroxymyristoyl]	YP_003065588.1		YP_003065288.1	protoporphyrinogen oxidase	YP_004063192.1
YP_004063060.1	cell division protein FtsZ	YP_003065589.1		YP_003065289.1	hypothetical protein	YP_004063191.1
YP_004063061.1	cell division protein	YP_003065590.1		YP_003065290.1	ATP-dependent Clp protease,	YP_004063190.1
YP_004063062.1	cell division protein	YP_003065591.1		YP_003065292.1	hypothetical protein	YP_004063189.1
YP_004063063.1	D-alanine--D-alanine ligase	YP_003065592.1		YP_003065294.1	Mrp protein [Candidatus	YP_004062819.1
YP_004063067.1	hypothetical protein CKC_04150	YP_003065631.1		YP_003065295.1	site-specific tyrosine	YP_004063187.1
YP_004063068.1	phage-related	YP_003064547.1		YP_003065296.1	hypothetical protein	YP_004063186.1
YP_004063069.1	poly(A) polymerase protein	YP_003065528.1		YP_003065297.2	GTP cyclohydrolase I	YP_004063185.1
YP_004063070.1	preprotein tranlocase protein	YP_003065529.2		YP_003065298.1	hypothetical protein	YP_004063184.1
YP_004063071.1	glutamyl-tRNA synthetase	YP_003065530.2		YP_003065302.1	inosine 5'-monophosphate	YP_004063183.1
YP_004063072.1	lysyl-tRNA synthetase	YP_003065531.1		YP_003065303.1	hypothetical protein	YP_004063182.1
YP_004063073.1	radical SAM protein	YP_003065533.1		YP_003065304.1	hypothetical protein	YP_004063181.1
YP_004063074.1	hypothetical protein CKC_04185	YP_003065534.1		YP_003065305.1	probable two-component	YP_004063180.1
YP_004063075.1	putative thiamine	YP_003065535.1		YP_003065306.1	two component response	YP_004063179.1
YP_004063076.1	putative ABC transporter,	YP_003065536.1		YP_003065307.1	hypothetical protein	YP_004063177.1
YP_004063077.1	elongation factor P	YP_003065480.1		YP_003065308.1	hypothetical protein	YP_004063176.1
YP_004063078.1	putative lysyl-tRNA synthetase	YP_003065479.1		YP_003065309.1	ABC transporter membrane	YP_004063175.1
YP_004063079.1	L-lysine 2,3-aminomutase	YP_003065478.1		YP_003065310.1	trigger factor [Candidatus	YP_004063174.1
YP_004063084.1	phage-related	YP_003064547.1		YP_003065311.1	hypothetical protein	YP_004063173.1
YP_004063089.1	chemotaxis sensory transducer	YP_003065442.1		YP_003065312.1	methionine aminopeptidase	YP_004063171.1
YP_004063090.1	chemotaxis sensory transducer	YP_003065442.1		YP_003065313.1	homoserine dehydrogenase	YP_004063170.1
YP_004063091.1	hypothetical protein CKC_04270	YP_003065439.1		YP_003065314.1	single-stranded-DNA-specific	YP_004063169.1
YP_004063093.1	deoxyuridine 5 27-triphosphate	YP_003065438.1		YP_003065315.1	isocitrate dehydrogenase	YP_004063110.1
YP_004063094.1	electron transfer	YP_003065437.1		YP_003065316.1	two-component sensor histidine	YP_004063109.1
YP_004063096.1	D-ribulose-5 phosphate	YP_003065388.1		YP_003065317.1	tRNA/rRNA methyltransferase	YP_004063108.1
YP_004063097.1	adenylosuccinate lyase	YP_003065387.1		YP_003065318.1	glutamate racemase [Candidatus	YP_004063107.1
YP_004063098.1		YP_003065386.1		YP_003065323.2	guanylate kinase [Candidatus	YP_004063148.1
YP_004063099.1		YP_003065385.1		YP_003065324.1	formyltetrahydrofolate	YP_004063147.1
YP_004063100.1		YP_003065384.1		YP_003065326.1	cold shock protein [Candidatus	YP_004062897.1
YP_004063101.1		YP_003065383.1		YP_003065327.1	hypothetical protein	YP_004062898.1
YP_004063102.1	hypothetical protein CKC_04325	YP_003065382.1		YP_003065328.1	oligoendopeptidase F	YP_004063226.1
YP_004063103.1	hypothetical protein CKC_04330	YP_003065381.1		YP_003065329.1	putative sigma-54-dependent	YP_004063225.1
YP_004063104.1	probable multidrug resistance	YP_003065380.1		YP_003065330.1	ABC transporter, nucleotide	YP_004063146.1
YP_004063105.1	glutaminase [Candidatus	YP_003064599.1		YP_003065331.1	glycosyl transferase family	YP_004063145.1
YP_004063106.1	30S ribosomal protein S4	YP_003064600.1		YP_003065332.1	dTDP-4-dehydrorhamnose	YP_004063144.1
YP_004063107.1	glutamate racemase [Candidatus	YP_003065318.1		YP_003065333.1	dTDP-glucose 4,6-dehydratase	YP_004063143.1
YP_004063108.1	tRNA/rRNA methyltransferase	YP_003065317.1		YP_003065334.1	dTDP-4-dehydrorhamnose	YP_004063142.1
YP_004063109.1	two-component sensor histidine	YP_003065316.1		YP_003065335.1	glucose-1-phosphate	YP_004063141.1
YP_004063110.1	isocitrate dehydrogenase	YP_003065315.1		YP_003065336.1	hypothetical protein	YP_004063140.1
YP_004063111.1	CTP synthetase [Candidatus	YP_003064608.1		YP_003065337.1	potassium-efflux system	YP_004063139.1
YP_004063112.1	hypothetical protein CKC_04375	YP_003064609.1		YP_003065338.1	bifunctional preprotein	YP_004063138.1
YP_004063113.1	triosephosphate isomerase	YP_003064610.1		YP_003065340.1	UDP-N-acetylglucosamine	YP_004063135.1
YP_004063114.1	hypothetical protein CKC_04385	YP_003064611.1		YP_003065341.1	histidyl-tRNA synthetase	YP_004063134.1
YP_004063115.1	outer membrane lipoprotein	YP_003064612.1		YP_003065342.1	hypothetical protein	YP_004062898.1
YP_004063116.1	ferrochelatase [Candidatus	YP_003064613.1		YP_003065343.1	nodulation protein (outer	YP_004063133.1
YP_004063117.1	hypothetical protein CKC_04400	YP_003064614.1		YP_003065345.1	hypothetical protein	YP_004063132.1
YP_004063118.1	hypothetical protein CKC_04405	YP_003064615.1		YP_003065346.1	valyl-tRNA synthetase	YP_004063131.1
YP_004063119.1	prenyltransferase [Candidatus	YP_003064618.1		YP_003065347.1	hypothetical protein	YP_004062836.1
YP_004063120.1	phosphoribosylamine--glycine	YP_003064619.1		YP_003065348.1	rare lipoprotein A [Candidatus	YP_004062837.1
YP_004063121.1	hypothetical protein CKC_04420	YP_003064620.1		YP_003065349.1	hypothetical protein	YP_004062838.1
YP_004063123.1	hypothetical protein CKC_04430	YP_003065612.1		YP_003065350.1	DNA-directed RNA polymerase	YP_004062839.1
YP_004063125.1	putative phage terminase,	YP_003065628.1		YP_003065351.1	4'-phosphopantetheinyl	YP_004062840.1
YP_004063126.1	integrase family protein	YP_003064547.1		YP_003065352.1	type I signal peptidase	YP_004062841.1
YP_004063129.1	bacterioferritin comigratory	YP_003064625.1		YP_003065353.1	ribonuclease III [Candidatus	YP_004062842.1
YP_004063131.1	valyl-tRNA synthetase	YP_003065346.1		YP_003065354.1	GTP-binding protein Era	YP_004062843.1
YP_004063132.1	hypothetical protein CKC_04475	YP_003065345.1		YP_003065355.1	UDP-N-acetylglucosamine	YP_004062844.1
YP_004063133.1	nodulation protein (outer	YP_003065343.1		YP_003065356.1		YP_004062845.1
YP_004063134.1	histidyl-tRNA synthetase	YP_003065341.1		YP_003065357.1	hypothetical protein	YP_004062846.1
YP_004063135.1	UDP-N-acetylglucosamine	YP_003065340.1		YP_003065358.1	ATP-dependent DNA helicase	YP_004062847.1
YP_004063138.1	bifunctional preprotein	YP_003065338.1		YP_003065359.1	hypothetical protein	YP_004062848.1
YP_004063139.1	potassium-efflux system	YP_003065337.1		YP_003065360.1	transcription-repair coupling	YP_004062849.1
YP_004063140.1	hypothetical protein CKC_04515	YP_003065336.1		YP_003065361.1	DNA repair protein RecO	YP_004062850.1
YP_004063141.1	glucose-1-phosphate	YP_003065335.1		YP_003065362.1	tyrosyl-tRNA synthetase	YP_004062851.1
YP_004063142.1	dTDP-4-dehydrorhamnose	YP_003065334.1		YP_003065363.2	hypothetical protein	YP_004062852.1
YP_004063143.1	dTDP-glucose 4,6-dehydratase	YP_003065333.1		YP_003065365.1	DNA helicase II [Candidatus	YP_004062995.1
YP_004063144.1	dTDP-4-dehydrorhamnose	YP_003065332.1		YP_003065366.1	OmpA/MotB [Candidatus	YP_004062994.1
YP_004063145.1	glycosyl transferase family	YP_003065331.1		YP_003065367.1	hypothetical protein	YP_004062993.1
YP_004063146.1	ABC transporter, nucleotide	YP_003065330.1		YP_003065368.1	hypothetical protein	YP_004062992.1
YP_004063147.1	formyltetrahydrofolate	YP_003065324.1		YP_003065369.1	thymidylate synthase	YP_004062991.1
YP_004063148.1	guanylate kinase [Candidatus	YP_003065323.2		YP_003065370.1	dihydrofolate reductase	YP_004062990.1
YP_004063154.1	two-component response	YP_003065329.1		YP_003065371.1	HflK protein [Candidatus	YP_004062989.1
YP_004063155.1	phytoene synthase protein	YP_003064574.1		YP_003065372.1	putative hydrolase serine	YP_004062988.1
YP_004063156.1	ATP-dependent Clp protease	YP_003064576.1		YP_003065373.1	phosphoserine phosphatase SerB	YP_004062986.1
YP_004063157.1	ATP-dependent Clp protease	YP_003064577.1		YP_003065377.1	ribonucleotide-diphosphate	YP_004062790.1
YP_004063158.1	hypothetical protein CKC_04605	YP_003064578.1		YP_003065378.1	hypothetical protein	YP_004063261.1
YP_004063159.1	hydrolase protein [Candidatus	YP_003064579.1		YP_003065380.1	probable multidrug resistance	YP_004063104.1
YP_004063160.1	hypothetical protein CKC_04615	YP_003064580.1		YP_003065381.1	hypothetical protein	YP_004063103.1
YP_004063161.1	monooxygenase FAD-binding	YP_003064581.1		YP_003065382.1	hypothetical protein	YP_004063102.1
YP_004063162.1	cationic amino acid ABC	YP_003064583.1		YP_003065383.1		YP_004063101.1
YP_004063163.1	ABC transporter membrane	YP_003064584.1		YP_003065384.1		YP_004063100.1
YP_004063164.1	general L-amino acid transport	YP_003064585.1		YP_003065385.1		YP_004063099.1
YP_004063165.1	ABC transporter related	YP_003064586.1		YP_003065386.1		YP_004063098.1
YP_004063166.1	putative oxidoreductase	YP_003064587.1		YP_003065387.1	adenylosuccinate lyase	YP_004063097.1
YP_004063167.1	phage-related lysozyme	YP_003065469.1		YP_003065388.1	D-ribulose-5 phosphate	YP_004063096.1
YP_004063169.1	single-stranded-DNA-specific	YP_003065314.1		YP_003065389.1	Holliday junction resolvase	YP_004063011.1
YP_004063170.1	homoserine dehydrogenase	YP_003065313.1		YP_003065390.1	putative glutamyl-tRNA(Gln)	YP_004063010.1
YP_004063171.1	methionine aminopeptidase	YP_003065312.1		YP_003065391.1	aspartyl/glutamyl-tRNA	YP_004063009.1
YP_004063173.1	hypothetical protein CKC_04680	YP_003065311.1		YP_003065392.1	aspartyl/glutamyl-tRNA	YP_004063008.1
YP_004063174.1	trigger factor [Candidatus	YP_003065310.1		YP_003065395.1	putative homoserine/homoserine	YP_004063007.1
YP_004063175.1	ABC transporter membrane	YP_003065309.1		YP_003065400.1	hypothetical protein	YP_004063402.1
YP_004063176.1	hypothetical protein CKC_04695	YP_003065308.1		YP_003065401.1	hypothetical protein	YP_004062413.1
YP_004063177.1	hypothetical protein CKC_04700	YP_003065307.1		YP_003065402.1	GCN5-related	YP_004063036.1
YP_004063179.1	two component response	YP_003065306.1		YP_003065404.1	excinuclease ABC subunit B	YP_004062975.1
YP_004063180.1	probable two-component	YP_003065305.1		YP_003065405.1	acyl-CoA hydrolase [Candidatus	YP_004062974.1
YP_004063181.1	hypothetical protein CKC_04720	YP_003065304.1		YP_003065406.1	hypothetical protein	YP_004062973.1
YP_004063182.1	hypothetical protein CKC_04725	YP_003065303.1		YP_003065408.1		YP_004062508.1
YP_004063183.1	inosine 5'-monophosphate	YP_003065302.1		YP_003065411.1	hypothetical protein	YP_004062894.1
YP_004063184.1	hypothetical protein CKC_04735	YP_003065298.1		YP_003065412.1	NAD synthetase [Candidatus	YP_004062895.1
YP_004063185.1	GTP cyclohydrolase I	YP_003065297.2		YP_003065416.1	hypothetical protein	YP_004062508.1
YP_004063186.1	hypothetical protein CKC_04745	YP_003065296.1		YP_003065417.1	threonyl-tRNA synthetase	YP_004062896.1
YP_004063187.1	site-specific tyrosine	YP_003065295.1		YP_003065419.1	ribonucleotide-diphosphate	YP_004062790.1
YP_004063188.1	hypothetical protein CKC_04755	YP_003065294.1		YP_003065420.1	hypothetical protein	YP_004062898.1
YP_004063189.1	hypothetical protein CKC_04760	YP_003065292.1		YP_003065422.1	hypothetical protein	YP_004062976.1
YP_004063190.1	ATP-dependent Clp protease,	YP_003065290.1		YP_003065424.1	orotate	YP_004063006.1
YP_004063191.1	hypothetical protein CKC_04770	YP_003065289.1		YP_003065425.1	dihydroorotase [Candidatus	YP_004063005.1
YP_004063192.1	protoporphyrinogen oxidase	YP_003065288.1		YP_003065427.1	hypothetical protein	YP_004063004.1
YP_004063193.1	peptide chain release factor 1	YP_003065287.1		YP_003065428.1	hypothetical protein	YP_004063003.1
YP_004063194.1	aspartate kinase [Candidatus	YP_003065286.1		YP_003065429.1	diphosphomevalonate	YP_004063002.1
YP_004063195.1	3-demethylubiquinone-9	YP_003065285.1		YP_003065430.1	GHMP kinase [Candidatus	YP_004063001.1
YP_004063196.1	lipoprotein-releasing system	YP_003065284.1		YP_003065431.1	GHMP kinase [Candidatus	YP_004063000.1
YP_004063198.1	prolyl-tRNA synthetase	YP_003065283.1		YP_003065432.1	hydroxymethylglutaryl-coenzyme	YP_004062999.1
YP_004063199.1	beta-lactamase	YP_003065282.1		YP_003065433.1	isopentenyl pyrophosphate	YP_004062998.1
YP_004063200.1	birA bifunctional protein	YP_003065281.1		YP_003065434.2	hydroxymethylglutaryl-coenzyme	YP_004062997.1
YP_004063201.1	NADH dehydrogenase subunit N	YP_003065280.1		YP_003065435.1	hypothetical protein	YP_004062996.1
YP_004063202.1	NADH dehydrogenase subunit M	YP_003065279.1		YP_003065437.1	electron transfer	YP_004063094.1
YP_004063203.1	NADH dehydrogenase subunit L	YP_003065278.1		YP_003065438.1	deoxyuridine 5 27-triphosphate	YP_004063093.1
YP_004063204.1	NADH-ubiquinone	YP_003065277.1		YP_003065439.1	hypothetical protein	YP_004063091.1
YP_004063205.1	NADH dehydrogenase subunit J	YP_003065275.1		YP_003065440.1	hypothetical protein	YP_004063091.1
YP_004063206.1	NADH dehydrogenase subunit I	YP_003065274.1		YP_003065441.1	putative Mg2+ chelatase family	YP_004063091.1
YP_004063207.1	NADH dehydrogenase subunit H	YP_003065273.1		YP_003065442.1	chemotaxis sensory transducer	YP_004063090.1
YP_004063208.1	NADH dehydrogenase subunit G	YP_003065272.1		YP_003065444.1	exsB protein [Candidatus	YP_004062860.1
YP_004063210.1	NADH dehydrogenase I subunit F	YP_003065271.1		YP_003065445.1	hypothetical protein	YP_004062861.1
YP_004063211.1	NADH-quinone oxidoreductase, E	YP_003065269.1		YP_003065446.1	HemY domain-containing protein	YP_004062862.1
YP_004063212.1	NADH dehydrogenase subunit D	YP_003065268.1		YP_003065447.1	hypothetical protein	YP_004062863.1
YP_004063213.1	NADH dehydrogenase subunit C	YP_003065267.1		YP_003065448.2	uroporphyrinogen-III synthase	YP_004062864.1
YP_004063214.1	NADH dehydrogenase subunit B	YP_003065266.1		YP_003065450.1	porphobilinogen deaminase	YP_004062865.1
YP_004063215.1	NADH dehydrogenase subunit A	YP_003065265.1		YP_003065451.1	putative DNA-binding/iron	YP_004062866.1
YP_004063216.1	chaperonin GroEL [Candidatus	YP_003065262.1		YP_003065452.1	putative glycerol-3-phosphate	YP_004062867.1
YP_004063217.1	co-chaperonin GroES	YP_003065261.1		YP_003065453.1	hypothetical protein	YP_004062868.1
YP_004063218.1	hypothetical protein CKC_04905	YP_003065260.1		YP_003065454.1	succinate dehydrogenase	YP_004062869.1
YP_004063219.1	bifunctional riboflavin	YP_003065259.1		YP_003065455.1	succinate dehydrogenase	YP_004062870.1
YP_004063221.1	glucose/galactose transporter	YP_003065256.1		YP_003065456.1	succinate dehydrogenase	YP_004062871.1
YP_004063222.1	2-octaprenyl-6-methoxyphenyl	YP_003065255.1		YP_003065457.1	succinate dehydrogenase	YP_004062872.1
YP_004063223.1	phosphatidylcholine synthase	YP_003065254.1		YP_003065458.1	outer membrane lipoprotein	YP_004062873.1
YP_004063224.1	polysialic acid capsule	YP_003065248.2		YP_003065460.1	AFG1-family ATPase [Candidatus	YP_004062874.1
YP_004063225.1	putative sigma-54-dependent	YP_003065329.1		YP_003065461.1	malate dehydrogenase	YP_004062875.1
YP_004063226.1	oligoendopeptidase F	YP_003065328.1		YP_003065462.1	succinyl-CoA synthetase	YP_004062876.1
YP_004063227.1	malic enzyme [Candidatus	YP_003064550.1		YP_003065463.1	succinyl-CoA synthetase	YP_004062877.1
YP_004063228.1	ABC transporter [Candidatus	YP_003064551.1		YP_003065464.1	alpha-ketoglutarate	YP_004062878.1
YP_004063229.1	ABC transporter [Candidatus	YP_003064551.1		YP_003065465.1	dihydrolipoamide	YP_004062879.1
YP_004063230.1	putative ATP-binding component	YP_003064552.1		YP_003065466.1	dihydrolipoamide dehydrogenase	YP_004062880.1
YP_004063231.1	putative ABC transporter,	YP_003064553.1		YP_003065467.1	ribose-5-phosphate isomerase A	YP_004062881.1
YP_004063232.1	putative ABC transporter	YP_003064554.1		YP_003065468.1	glutathione reductase	YP_004062882.1
YP_004063233.1	DNA-directed RNA polymerase	YP_003064555.1		YP_003065469.1	phage-related lysozyme	YP_004062411.1
YP_004063234.1	DNA-directed RNA polymerase	YP_003064556.1		YP_003065471.1	phage-related lysozyme	YP_004062987.1
YP_004063235.1	50S ribosomal protein L12P	YP_003064557.1		YP_003065472.1	cysteine desulfurase activator	YP_004062883.1
YP_004063236.1	50S ribosomal protein L10	YP_003064558.1		YP_003065473.1	ABC transporter, nucleotide	YP_004062884.1
YP_004063237.1	50S ribosomal protein L1	YP_003064559.1		YP_003065474.1	putative iron-sulfur cluster	YP_004062886.1
YP_004063238.1	50S ribosomal protein L11	YP_003064560.1		YP_003065475.1	putative aminotransferase	YP_004062891.1
YP_004063239.1	transcription antitermination	YP_003064561.1		YP_003065476.1	hypothetical protein	YP_004062892.1
YP_004063240.1	hypothetical protein CKC_05015	YP_003064562.1		YP_003065477.1	FeS assembly scaffold SufA	YP_004062893.1
YP_004063241.1	translation elongation factor	YP_003064676.1		YP_003065478.1	L-lysine 2,3-aminomutase	YP_004063079.1
YP_004063242.1	tRNA-specific 2-thiouridylase	YP_003064564.1		YP_003065479.1	putative lysyl-tRNA synthetase	YP_004063078.1
YP_004063244.1	phosphoserine aminotransferase	YP_003064566.1		YP_003065480.1	elongation factor P	YP_004063077.1
YP_004063245.1	putative	YP_003064569.1		YP_003065486.1	coproporphyrinogen III oxidase	YP_004062956.1
YP_004063246.1	phosphoribosylaminoimidazole	YP_003064570.1		YP_003065487.1	uracil-DNA glycosylase	YP_004062954.1
YP_004063247.1	phosphoribosylaminoimidazole	YP_003064571.1		YP_003065489.1	ribonuclease HII [Candidatus	YP_004062953.1
YP_004063248.1	hypothetical protein CKC_05065	YP_003064572.1		YP_003065491.1	hypothetical protein	YP_004062952.1
YP_004063249.1	hypothetical protein CKC_05070	YP_003064573.1		YP_003065492.1	diguanylate cyclase	YP_004062951.1
YP_004063250.1	fumarate hydratase [Candidatus	YP_003064603.1		YP_003065493.1	hypothetical protein	YP_004062950.1
YP_004063251.1	alanyl-tRNA synthetase	YP_003064604.1		YP_003065498.1	F0F1 ATP synthase subunit B	YP_004062924.1
YP_004063252.1	recombinase A [Candidatus	YP_003064605.2		YP_003065499.1	F0F1 ATP synthase subunit B'	YP_004062923.1
YP_004063253.1	lipid A ABC exporter family,	YP_003064606.1		YP_003065500.1	H+transporting two-sector	YP_004062922.1
YP_004063254.1	lipid A ABC exporter family,	YP_003064606.1		YP_003065501.1	F0F1 ATP synthase subunit A	YP_004062921.1
YP_004063255.1	50S ribosomal protein L31	YP_003064607.1		YP_003065504.1	putative	YP_004062919.1
YP_004063256.1	phage-related lysozyme	YP_003065469.1		YP_003065506.1	hypothetical protein	YP_004062918.1
YP_004063259.1	hypothetical protein CKC_05125	YP_003065612.1		YP_003065507.1	glycyl-tRNA synthetase subunit	YP_004062917.1
YP_004063261.1	hypothetical protein CKC_05135	YP_003065378.1		YP_003065508.1		YP_004062910.1
YP_004063265.1	lipoyltransferase [Candidatus	YP_003064590.1		YP_003065509.1		YP_004062909.1
YP_004063266.1	queuine	YP_003064591.1		YP_003065510.1	N-acetylglucosaminyl	YP_004062908.1
YP_004063267.1	S-adenosylmethionine:tRNA	YP_003064593.1		YP_003065511.1	cell division protein FtsW	YP_004062907.1
YP_004063268.1	phosphopantetheine	YP_003064594.1		YP_003065512.1		YP_004062906.1
YP_004063269.1	DNA gyrase subunit A	YP_003064595.1		YP_003065513.1		YP_004062905.1
YP_004063270.1	single-strand binding protein	YP_003064596.1		YP_003065514.1		YP_004062904.1
YP_004063271.1	excinuclease ABC subunit A	YP_003064597.1		YP_003065515.1		YP_004062903.1
YP_004063272.1	glutamine synthetase protein	YP_003064598.1		YP_003065516.1	penicillin-binding	YP_004062902.1
YP_004063273.1	DNA primase [Candidatus	YP_003065247.1		YP_003065517.1	hypothetical protein	YP_004062901.1
YP_004063275.1	hypothetical protein CKC_05205	YP_003064642.1		YP_003065518.2	S-adenosyl-methyltransferase	YP_004062900.1
YP_004063278.1	inorganic pyrophosphatase	YP_003064645.1		YP_003065519.1	cell division protein MraZ	YP_004062899.1
YP_004063279.1	GTP-binding protein	YP_003064646.1		YP_003065520.1	phosphoglucomutase [Candidatus	YP_004062961.1
YP_004063280.1	argininosuccinate synthase	YP_003064647.1		YP_003065521.1	von Willebrand factor type A	YP_004062962.1
YP_004063282.1	50S ribosomal protein L17	YP_003064649.1		YP_003065522.1	hypothetical protein	YP_004062967.1
YP_004063283.1	DNA-directed RNA polymerase	YP_003064650.1		YP_003065523.1	von Willebrand factor type A	YP_004062968.1
YP_004063284.1	30S ribosomal protein S11	YP_003064651.1		YP_003065524.1	geranyltranstransferase	YP_004062969.1
YP_004063285.1	30S ribosomal protein S13	YP_003064652.1		YP_003065525.1	putative amino acid-binding	YP_004062970.1
YP_004063286.1	adenylate kinase [Candidatus	YP_003064653.1		YP_003065526.1	amino acid ABC transporter	YP_004062971.1
YP_004063287.1	preprotein translocase subunit	YP_003064654.1		YP_003065527.1	glycosyl transferase family	YP_004062972.1
YP_004063288.1	50S ribosomal protein L15	YP_003064655.1		YP_003065528.1	poly(A) polymerase protein	YP_004063069.1
YP_004063289.1	50S ribosomal protein L30	YP_003064656.1		YP_003065529.2	preprotein tranlocase protein	YP_004063070.1
YP_004063290.1	30S ribosomal protein S5	YP_003064657.1		YP_003065530.2	glutamyl-tRNA synthetase	YP_004063071.1
YP_004063291.1	50S ribosomal protein L18	YP_003064658.1		YP_003065531.1	lysyl-tRNA synthetase	YP_004063072.1
YP_004063292.1	50S ribosomal protein L6	YP_003064659.1		YP_003065533.1	radical SAM protein	YP_004063073.1
YP_004063293.1	30S ribosomal protein S8	YP_003064660.1		YP_003065534.1	hypothetical protein	YP_004063074.1
YP_004063294.1	30S ribosomal protein S14	YP_003064661.1		YP_003065535.1	putative thiamine	YP_004063075.1
YP_004063295.1	50S ribosomal protein L5	YP_003064662.1		YP_003065536.1	putative ABC transporter,	YP_004063076.1
YP_004063296.1	50S ribosomal protein L24	YP_003064663.1		YP_003065541.1	hypothetical protein	YP_004063012.1
YP_004063297.1	50S ribosomal protein L14	YP_003064664.1		YP_003065542.1	hypothetical protein	YP_004063013.1
YP_004063298.1	30S ribosomal protein S17	YP_003064665.1		YP_003065543.1	hypothetical protein	YP_004063014.1
YP_004063299.1	ribosomal protein L29	YP_003064666.1		YP_003065544.1	hypothetical protein	YP_004063015.1
YP_004063300.1	50S ribosomal protein L16	YP_003064667.1		YP_003065546.1	hypothetical protein	YP_004063016.1
YP_004063301.1	30S ribosomal protein S3	YP_003064668.1		YP_003065547.1	hypothetical protein	YP_004063017.1
YP_004063302.1	50S ribosomal protein L22	YP_003064669.1		YP_003065548.1	hypothetical protein	YP_004063017.1
YP_004063303.1	SSU ribosomal protein S19P	YP_003064670.1		YP_003065549.1	hypothetical protein	YP_004063017.1
YP_004063304.1	50S ribosomal protein L2	YP_003064671.1		YP_003065550.1	hypothetical protein	YP_004063018.1
YP_004063305.1	50S ribosomal protein L23	YP_003064672.1		YP_003065551.1	hypothetical protein	YP_004063020.1
YP_004063306.1	50S ribosomal protein L4	YP_003064673.1		YP_003065552.1	hypothetical protein	YP_004063021.1
YP_004063307.1	50S ribosomal protein L3	YP_003064674.1		YP_003065554.1	hypothetical protein	YP_004063023.1
YP_004063308.1	30S ribosomal protein S10	YP_003064675.1		YP_003065557.1	hypothetical protein	YP_004063024.1
YP_004063309.1	translation elongation factor	YP_003064676.1		YP_003065558.1	hypothetical protein	YP_004063024.1
YP_004063310.1	elongation factor G	YP_003064677.1		YP_003065559.1	hypothetical protein	YP_004063026.1
YP_004063311.1	30S ribosomal protein S7	YP_003064678.1		YP_003065560.1	transcriptional regulator	YP_004063028.1
YP_004063312.1	30S ribosomal protein S7	YP_003064678.1		YP_003065561.1	hypothetical protein	YP_004063029.1
YP_004063313.1	30S ribosomal protein S12	YP_003064679.1		YP_003065562.1	replicative DNA helicase	YP_004063029.1
YP_004063314.1	acetyl-CoA carboxylase biotin	YP_003064680.1		YP_003065565.1	hypothetical protein	YP_004063030.1
YP_004063315.1	acetyl-CoA carboxylase biotin	YP_003064681.1		YP_003065571.1	peptidyl prolyl cis-trans	YP_004063033.1
YP_004063316.1		YP_003064682.1		YP_003065573.1	16S rRNA m3U1498	YP_004063034.1
YP_004063317.1	ATP-dependent protease La	YP_003064683.1		YP_003065574.1	glutamate--cysteine ligase	YP_004063035.1
YP_004063318.1	ATP-dependent protease	YP_003064684.1		YP_003065575.1	GCN5-related	YP_004063036.1
YP_004063319.1	ATP-dependent Clp protease	YP_003064685.1		YP_003065578.1	pyridoxamine 5'-phosphate	YP_004063037.1
YP_004063321.1	putative ABC transporter	YP_003064686.1		YP_003065579.1	enoyl-(acyl carrier protein)	YP_004063038.1
YP_004063322.1	lysophospholipase protein	YP_003064687.1		YP_003065580.1	tRNA-dihydrouridine synthase A	YP_004063041.1
YP_004063323.1	SsrA-binding protein	YP_003064688.1		YP_003065582.1	ascorbate-specific PTS system	YP_004063049.1
YP_004063324.1	dihydrodipicolinate synthase	YP_003064689.1		YP_003065583.1	deoxyribodipyrimidine	YP_004063050.1
YP_004063325.1	DNA polymerase I [Candidatus	YP_003064690.1		YP_003065584.1	hypothetical protein	YP_004063052.1
YP_004063326.1	DNA polymerase I [Candidatus	YP_003064690.1		YP_003065585.1	NAD-dependent DNA ligase LigA	YP_004063056.1
YP_004063327.1	phosphoglyceromutase	YP_003064691.1		YP_003065586.2	DNA repair protein RecN	YP_004063057.1
YP_004063328.1	dihydrodipicolinate reductase	YP_003064692.1		YP_003065587.1	outer membrane assembly	YP_004063058.1
YP_004063329.1	glucokinase [Candidatus	YP_003064693.1		YP_003065588.1	UDP-3-O-[3-hydroxymyristoyl]	YP_004063059.1
YP_004063330.1	cytochrome-c oxidase assembly	YP_003064694.1		YP_003065589.1	cell division protein FtsZ	YP_004063060.1
YP_004063331.1	putative transcription	YP_003064695.1		YP_003065590.1	cell division protein	YP_004063061.1
YP_004063332.1	thioredoxin reductase (NADPH)	YP_003064696.1		YP_003065591.1	cell division protein	YP_004063062.1
YP_004063333.1	hypothetical protein CKC_05500	YP_003064697.1		YP_003065592.1	D-alanine--D-alanine ligase	YP_004063063.1
YP_004063334.1	arginyl-tRNA synthetase	YP_003064698.1		YP_003065595.1	hypothetical protein	YP_004063042.1
YP_004063335.1	deoxyguanosinetriphosphate	YP_003064699.1		YP_003065600.1	putative phage terminase,	YP_004062429.1
YP_004063336.1	iron-sulfur cluster assembly	YP_003064700.1		YP_003065601.1	hypothetical protein	YP_004063392.1
YP_004063337.1	exodeoxyribonuclease III	YP_003064701.1		YP_003065603.1	hypothetical protein	YP_004063412.1
YP_004063338.1	RNA polymerase sigma factor	YP_003064702.1		YP_003065604.1	hypothetical protein	YP_004062452.1
YP_004063340.1	quinone oxidoreductase	YP_003064703.1		YP_003065605.1	hypothetical protein	YP_004062455.1
YP_004063341.1	hypothetical protein CKC_05540	YP_003064704.1		YP_003065606.1	putative DNA polymerase from	YP_004062456.1
YP_004063342.1	50S ribosomal protein L13	YP_003064705.1		YP_003065607.1	hypothetical protein	YP_004063425.1
YP_004063343.1	30S ribosomal protein S9	YP_003064706.1		YP_003065608.2	SNF2 related [Candidatus	YP_004063426.1
YP_004063344.1		YP_003064707.1		YP_003065609.1	DNA ligase, NAD-dependent	YP_004063427.1
YP_004063345.1	tRNA pseudouridine synthase A	YP_003064708.1		YP_003065610.1	guanylate kinase [Candidatus	YP_004063428.1
YP_004063346.1	methionyl-tRNA	YP_003064709.2		YP_003065612.1	hypothetical protein	YP_004063375.1
YP_004063347.1	peptide deformylase	YP_003064710.1		YP_003084344.1	hypothetical protein	YP_004063409.1
YP_004063349.1	putative transmembrane protein	YP_003064711.1		YP_003084345.1	hypothetical protein	YP_004062796.1
YP_004063350.1	aminodeoxychorismate lyase	YP_003064945.1		YP_003065615.1	hypothetical protein	YP_004063377.1
YP_004063351.1	3-oxoacyl-(acyl carrier	YP_003064946.1		YP_003065617.1	hypothetical protein	YP_004063379.1
YP_004063352.1	acyl carrier protein	YP_003064947.1		YP_003065618.1	hypothetical protein	YP_004063381.1
YP_004063353.1		YP_003064948.1		YP_003065619.1	hypothetical protein	YP_004063382.1
YP_004063354.1	acyl-carrier-protein	YP_003064949.1		YP_003065621.1	hypothetical protein	YP_004063384.1
YP_004063355.1	periplasmic solute binding	YP_003064950.1		YP_003065622.1	hypothetical protein	YP_004062423.1
YP_004063356.1	ABC transporter, nucleotide	YP_003064951.1		YP_003065623.1	hypothetical protein	YP_004063386.1
YP_004063357.1	ABC transporter, membrane	YP_003064952.1		YP_003065624.1	hypothetical protein	YP_004063387.1
YP_004063358.1	ABC transporter, membrane	YP_003064953.1		YP_003065625.1	hypothetical protein	YP_004063388.1
YP_004063359.1	hypothetical protein CKC_05630	YP_003064955.1		YP_003065626.1	head-to-tail joining protein,	YP_004062427.1
YP_004063360.1	NADH dehydrogenase [Candidatus	YP_003064956.1		YP_003065628.1	putative phage terminase,	YP_004062429.1
YP_004063361.1	phosphoglucosamine mutase	YP_003064957.1		YP_003065630.1	hypothetical protein	YP_004062430.1
YP_004063362.1	metalloprotease [Candidatus	YP_003064958.1		YP_003065631.1	hypothetical protein	YP_004063067.1
YP_004063363.1	hypothetical protein CKC_05650	YP_003064959.1		YP_003065632.1	hypothetical protein	YP_004062978.1
YP_004063364.1	OmpA/MotB [Candidatus	YP_003064960.1		YP_003065634.1	hypothetical protein	YP_004063047.1
YP_004063365.1	translocation protein TolB	YP_003064961.1		YP_003065636.1	intrrupted gp229, phage	YP_004062433.1
YP_004063366.1	signal peptide protein	YP_003064962.1		YP_003065637.1	hypothetical protein	YP_004062980.1
YP_004063367.1	tolQ protein [Candidatus	YP_003064964.1		YP_003065638.1	P4 family phage/plasmid	YP_004062444.1
YP_004063368.1	Holliday junction DNA helicase	YP_003064965.1
YP_004063369.1	Holliday junction DNA helicase	YP_003064966.1
YP_004063370.1	Holliday junction resolvase	YP_003064967.1
YP_004063375.1	hypothetical protein CKC_05710	YP_003065612.1
YP_004063377.1	hypothetical protein CKC_05720	YP_003065615.1
YP_004063379.1	hypothetical protein CKC_05730	YP_003065617.1
YP_004063381.1	hypothetical protein CKC_05740	YP_003065618.1
YP_004063382.1	hypothetical protein CKC_05745	YP_003065619.1
YP_004063384.1	hypothetical protein CKC_05755	YP_003065621.1
YP_004063385.1	hypothetical protein CKC_05760	YP_003065622.1
YP_004063386.1	hypothetical protein CKC_05765	YP_003065623.1
YP_004063387.1	hypothetical protein CKC_05770	YP_003065624.1
YP_004063388.1	hypothetical protein CKC_05775	YP_003065625.1
YP_004063389.1	head-to-tail joining protein,	YP_003065626.1
YP_004063391.1	putative phage terminase,	YP_003065628.1
YP_004063392.1	hypothetical protein CKC_05795	YP_003065601.1
YP_004063397.1	hypothetical protein CKC_05820	YP_003065631.1
YP_004063399.1	hypothetical protein CKC_05830	YP_003065631.1
YP_004063401.1	hypothetical protein CKC_05840	YP_003065634.1
YP_004063402.1	prophage antirepressor	YP_003064538.1
YP_004063409.1	hypothetical protein CKC_05880	YP_003084344.1
YP_004063411.1	P4 family phage/plasmid	YP_003065638.1
YP_004063412.1	P4 family phage/plasmid	YP_003065638.1
YP_004063413.1	P4 family phage/plasmid	YP_003065638.1
YP_004063418.1	hypothetical protein CKC_05925	YP_003064535.1
YP_004063420.1	hypothetical protein CKC_05935	YP_003064537.1
YP_004063422.1	prophage antirepressor	YP_003064538.1
YP_004063423.1	hypothetical protein CKC_05950	YP_003064539.1
YP_004063424.1	putative DNA polymerase from	YP_003064540.1
YP_004063425.1	VRR-NUC domain-containing	YP_003064541.1
YP_004063426.1	SNF2 related protein	YP_003065608.2
YP_004063427.1	DNA ligase, NAD-dependent	YP_003064544.1
YP_004063428.1	guanylate kinase [Candidatus	YP_003064545.1
YP_004063431.1	integrase family protein	YP_003064547.1
