# Supplementary material for: The Complete Genome Sequence of ‘Candidatus Liberibacter solanacearum’, the Bacterium Associated with Potato Zebra Chip Disease
Source: PLoS One. 2011 Apr 28;6(4):e19135. doi: 10.1371/journal.pone.0019135 (PMC3084294; doi:10.1371/journal.pone.0019135)
Supplement: Table S4 — List of ‘ Candidatus Liberibacter solanacearum’-specific and ‘ Candidatus Liberibacter asiaticus’-specific CDS. (XLSX) [file pone.0019135.s012.xlsx]

## Sheet: Table S4
Table S4. List of Lso-specific and Las-specific predicted CDS.
Lso-specific		Las-specific
YP_004062246.1	hypothetical protein CKC_00035	YP_003064536.1	hypothetical protein
YP_004062247.1	hypothetical protein CKC_00040	YP_003064546.1	hypothetical protein
YP_004062249.1	hypothetical protein CKC_00050	YP_003064565.1	D-3-phosphoglycerate dehydrogenase
YP_004062253.1	hypothetical protein CKC_00070	YP_003064567.1	hypothetical protein
YP_004062268.1	hypothetical protein CKC_00145	YP_003064568.1	hypothetical protein
YP_004062274.1	hypothetical protein CKC_00175	YP_003064575.1	hypothetical protein
YP_004062275.1	hypothetical protein CKC_00180	YP_003064582.1	hypothetical protein
YP_004062276.1	hypothetical protein CKC_00185	YP_003064588.1	hypothetical protein
YP_004062277.1	phage-related lysozyme	YP_003064589.1	hypothetical protein
YP_004062278.1	hypothetical protein CKC_00195	YP_003064592.1	hypothetical protein
YP_004062280.1	hypothetical protein CKC_00205	YP_003064601.1	hypothetical protein
YP_004062324.1	hypothetical protein CKC_00425	YP_003064602.1	hypothetical protein
YP_004062329.1	hypothetical protein CKC_00450	YP_003064616.1	hypothetical protein
YP_004062383.1	hypothetical protein CKC_00720	YP_003064617.1	hypothetical protein
YP_004062384.1	hypothetical protein CKC_00725	YP_003064621.1	hypothetical protein
YP_004062387.1	hypothetical protein CKC_00740	YP_003064622.1	hypothetical protein
YP_004062388.1	hypothetical protein CKC_00745	YP_003064623.1	hypothetical protein
YP_004062389.1	hypothetical protein CKC_00750	YP_003064624.1	hypothetical protein
YP_004062412.1	hypothetical protein CKC_00865	YP_003064626.1	hypothetical protein
YP_004062414.1	hypothetical protein CKC_00875	YP_003064632.1	hypothetical protein
YP_004062416.1	hypothetical protein CKC_00885	YP_003064633.1	hypothetical protein
YP_004062418.1	hypothetical protein CKC_00895	YP_003064634.1	hypothetical protein
YP_004062421.1	hypothetical protein CKC_00910	YP_003064643.1	hypothetical protein
YP_004062425.1	hypothetical protein CKC_00930	YP_003064644.1	hypothetical protein
YP_004062428.1	hypothetical protein CKC_00945	YP_003064648.1	hypothetical protein
YP_004062432.1	hypothetical protein CKC_00965	YP_003064717.1	DNA protecting protein DprA
YP_004062434.1	hypothetical protein CKC_00975	YP_003064718.1	hypothetical protein
YP_004062436.1	hypothetical protein CKC_00985	YP_003064728.1	hypothetical protein
YP_004062437.1	hypothetical protein CKC_00990	YP_003064751.1	hypothetical protein
YP_004062438.1	hypothetical protein CKC_00995	YP_003064752.1	hypothetical protein
YP_004062439.1	hypothetical protein CKC_01000	YP_003064767.1	hypothetical protein
YP_004062440.1	hypothetical protein CKC_01005	YP_003064769.1	hypothetical protein
YP_004062441.1	hypothetical protein CKC_01010	YP_003064770.1	hypothetical protein
YP_004062443.1	hypothetical protein CKC_01020	YP_003064802.1	hypothetical protein
YP_004062446.1	hypothetical protein CKC_01035	YP_003064820.1	hypothetical protein
YP_004062447.1	hypothetical protein CKC_01040	YP_003064860.1	hypothetical protein
YP_004062448.1	hypothetical protein CKC_01045	YP_003064905.1	hypothetical protein
YP_004062449.1	hypothetical protein CKC_01050	YP_003084341.1	hypothetical protein
YP_004062451.1	hypothetical protein CKC_01060	YP_003065230.1	preprotein translocase subunit
YP_004062453.1	anti-repressor protein	YP_003065229.1	hypothetical protein
YP_004062461.1	hypothetical protein CKC_01110	YP_003084342.1	hypothetical protein
YP_004062462.1	hypothetical protein CKC_01115	YP_003084343.1	hypothetical protein
YP_004062468.1	DNA polymerase III subunits	YP_003065172.1	hypothetical protein
YP_004062469.1	DNA polymerase III subunits	YP_003065150.1	hypothetical protein
YP_004062489.1	hypothetical protein CKC_01250	YP_003065149.1	hypothetical protein
YP_004062491.1	hypothetical protein CKC_01260	YP_003065148.1	hypothetical protein
YP_004062493.1	phage-related	YP_003065147.1	Flp/Fap pilin component
YP_004062527.1	hypothetical protein CKC_01440	YP_003065144.2	hypothetical protein
YP_004062529.1	hypothetical protein CKC_01450	YP_003065143.1	hypothetical protein
YP_004062535.1	double-strand break repair	YP_003065105.1	hypothetical protein
YP_004062548.1	acetylglutamate kinase	YP_003065104.1	hypothetical protein
YP_004062567.1	hypothetical protein CKC_01640	YP_003065092.1	hypothetical protein
YP_004062569.1	hypothetical protein CKC_01650	YP_003065091.1	hypothetical protein
YP_004062570.1	hypothetical protein CKC_01655	YP_003065081.1	hypothetical protein
YP_004062571.1	hypothetical protein CKC_01660	YP_003065080.1	hypothetical protein
YP_004062572.1	hypothetical protein CKC_01665	YP_003065078.2	hypothetical protein
YP_004062573.1	Dyp-type peroxidase	YP_003065070.1	hypothetical protein
YP_004062574.1	hypothetical protein CKC_01675	YP_003065069.2	hypothetical protein
YP_004062581.1	hypothetical protein CKC_01710	YP_003065064.1	hypothetical protein
YP_004062605.1	hypothetical protein CKC_01830	YP_003065058.1	hypothetical protein
YP_004062614.1	hypothetical protein CKC_01875	YP_003065057.1	hypothetical protein
YP_004062615.1	hypothetical protein CKC_01880	YP_003065056.2	hypothetical protein
YP_004062621.1	tRNA	YP_003065055.1	hypothetical protein
YP_004062622.1	type I	YP_003065054.1	hypothetical protein
YP_004062633.1	hypothetical protein CKC_01970	YP_003065053.1	hypothetical protein
YP_004062639.1	hypothetical protein CKC_02000	YP_003065052.1	hypothetical protein
YP_004062653.1	hypothetical protein CKC_02070	YP_003065045.1	hypothetical protein
YP_004062658.1	hypothetical protein CKC_02095	YP_003065044.1	hypothetical protein
YP_004062694.1	hypothetical protein CKC_02275	YP_003065020.1	hypothetical protein
YP_004062699.1	hypothetical protein CKC_02300	YP_003064994.1	hypothetical protein
YP_004062700.1	hypothetical protein CKC_02305	YP_003064987.2	hypothetical protein
YP_004062710.1	LexA repressor [Candidatus	YP_003064981.1	hypothetical protein
YP_004062729.1	hypothetical protein CKC_02460	YP_003064977.1	hypothetical protein
YP_004062744.1	hypothetical protein CKC_02535	YP_003064976.1	extracellular solute-binding protein
YP_004062752.1	hypothetical protein CKC_02575	YP_003064969.1	hypothetical protein
YP_004062760.1	hypothetical protein CKC_02615	YP_003064968.1	hypothetical protein
YP_004062791.1	hypothetical protein CKC_02770	YP_003064963.2	hypothetical protein
YP_004062793.1	hypothetical protein CKC_02780	YP_003064954.2	hypothetical protein
YP_004062794.1	hypothetical protein CKC_02785	YP_003064931.1	hypothetical protein
YP_004062795.1	hypothetical protein CKC_02790	YP_003064930.2	DNA-methyltransferase MKpn2kI
YP_004062797.1	hypothetical protein CKC_02800	YP_003064929.1	type II modification
YP_004062798.1	hypothetical protein CKC_02805	YP_003064928.1	hypothetical protein
YP_004062799.1	hypothetical protein CKC_02810	YP_003064927.1	type II restriction
YP_004062801.1	hypothetical protein CKC_02820	YP_003064926.1	hypothetical protein
YP_004062809.1	hypothetical protein CKC_02860	YP_003064914.1	hypothetical protein
YP_004062810.1	hypothetical protein CKC_02865	YP_003065243.1	hypothetical protein
YP_004062812.1	hypothetical protein CKC_02875	YP_003065249.1	putative type I restriction-modification system DNA methylase
YP_004062813.1	hypothetical protein CKC_02880	YP_003065250.1	putative restriction endonuclease S subunit
YP_004062814.1	hypothetical protein CKC_02885	YP_003065251.1	hypothetical protein
YP_004062815.1	hypothetical protein CKC_02890	YP_003065252.1	hypothetical protein
YP_004062816.1	hypothetical protein CKC_02895	YP_003065253.1	hypothetical protein
YP_004062834.1	hypothetical protein CKC_02985	YP_003065257.1	hypothetical protein
YP_004062853.1	hypothetical protein CKC_03080	YP_003065263.1	hypothetical protein
YP_004062854.1	hypothetical protein CKC_03085	YP_003065264.1	hypothetical protein
YP_004062855.1	hypothetical protein CKC_03090	YP_003065270.1	hypothetical protein
YP_004062856.1	hypothetical protein CKC_03095	YP_003065276.1	hypothetical protein
YP_004062857.1	hypothetical protein CKC_03100	YP_003065291.1	hypothetical protein
YP_004062858.1	hypothetical protein CKC_03105	YP_003065293.1	hypothetical protein
YP_004062859.1	hypothetical protein CKC_03110	YP_003065299.1	hypothetical protein
YP_004062887.1	hypothetical protein CKC_03250	YP_003065300.1	hypothetical protein
YP_004062888.1	hypothetical protein CKC_03255	YP_003065301.1	hypothetical protein
YP_004062889.1	hypothetical protein CKC_03260	YP_003065319.1	hypothetical protein
YP_004062890.1	hypothetical protein CKC_03265	YP_003065320.1	hypothetical protein
YP_004062911.1	hypothetical protein CKC_03370	YP_003065321.1	hypothetical protein
YP_004062912.1	hypothetical protein CKC_03375	YP_003065322.1	hypothetical protein
YP_004062914.1	hypothetical protein CKC_03385	YP_003065325.1	hypothetical protein
YP_004062915.1	hypothetical protein CKC_03390	YP_003065339.1	hypothetical protein
YP_004062916.1	hypothetical protein CKC_03395	YP_003065344.1	hypothetical protein
YP_004062920.1	hypothetical protein CKC_03415	YP_003065364.1	hypothetical protein
YP_004062925.1	hypothetical protein CKC_03440	YP_003065374.1	hypothetical protein
YP_004062926.1	hypothetical protein CKC_03445	YP_003065375.1	hypothetical protein
YP_004062927.1	hypothetical protein CKC_03450	YP_003065376.1	hypothetical protein
YP_004062928.1	hypothetical protein CKC_03455	YP_003065379.1	hypothetical protein
YP_004062929.1	hypothetical protein CKC_03460	YP_003065393.1	hypothetical protein
YP_004062930.1	hypothetical protein CKC_03465	YP_003065394.1	hypothetical protein
YP_004062931.1	hypothetical protein CKC_03470	YP_003065396.1	hypothetical protein
YP_004062932.1	hypothetical protein CKC_03475	YP_003065397.1	hypothetical protein
YP_004062933.1	hypothetical protein CKC_03480	YP_003065398.1	hypothetical protein
YP_004062934.1	hypothetical protein CKC_03485	YP_003065399.1	hypothetical protein
YP_004062935.1	hypothetical protein CKC_03490	YP_003065403.1	hypothetical protein
YP_004062936.1	hypothetical protein CKC_03495	YP_003065407.1	hypothetical protein
YP_004062937.1	hypothetical protein CKC_03500	YP_003065409.1	hypothetical protein
YP_004062938.1	hypothetical protein CKC_03505	YP_003065410.1	hypothetical protein
YP_004062939.1	hypothetical protein CKC_03510	YP_003065413.1	tRNA (uracil-5-)-methyltransferase
YP_004062940.1	hypothetical protein CKC_03515	YP_003065414.1	hypothetical protein
YP_004062941.1	hypothetical protein CKC_03520	YP_003065415.1	hypothetical protein
YP_004062942.1	hypothetical protein CKC_03525	YP_003065418.1	hypothetical protein
YP_004062943.1	hypothetical protein CKC_03530	YP_003065421.1	hypothetical protein
YP_004062944.1	hypothetical protein CKC_03535	YP_003065423.1	hypothetical protein
YP_004062945.1	hypothetical protein CKC_03540	YP_003065426.1	phage-associated protein
YP_004062946.1	hypothetical protein CKC_03545	YP_003065436.1	hypothetical protein
YP_004062947.1	hypothetical protein CKC_03550	YP_003065443.1	hypothetical protein
YP_004062948.1	hypothetical protein CKC_03555	YP_003065449.1	hypothetical protein
YP_004062949.1	hypothetical protein CKC_03560	YP_003065459.1	hypothetical protein
YP_004062955.1	uracil-DNA glycosylase	YP_003065470.1	hypothetical protein
YP_004062957.1	hypothetical protein CKC_03600	YP_003065481.1	hypothetical protein
YP_004062958.1	hypothetical protein CKC_03605	YP_003065482.1	hypothetical protein
YP_004062959.1	hypothetical protein CKC_03610	YP_003065483.1	hypothetical protein
YP_004062960.1	hypothetical protein CKC_03615	YP_003065484.1	hypothetical protein
YP_004062963.1	hypothetical protein CKC_03630	YP_003065485.1	hypothetical protein
YP_004062964.1	hypothetical protein CKC_03635	YP_003065488.1	hypothetical protein
YP_004062965.1	hypothetical protein CKC_03640	YP_003065490.1	hypothetical protein
YP_004062966.1	hypothetical protein CKC_03645	YP_003065494.1	hypothetical protein
YP_004062979.1	hypothetical protein CKC_03710	YP_003065495.1	hypothetical protein
YP_004062983.1	hypothetical protein CKC_03730	YP_003065496.1	hypothetical protein
YP_004062984.1	hypothetical protein CKC_03735	YP_003065497.1	hypothetical protein
YP_004062985.1	tRNA	YP_003065502.1	hypothetical protein
YP_004063019.1	hypothetical protein CKC_03910	YP_003065503.1	hypothetical protein
YP_004063022.1	hypothetical protein CKC_03925	YP_003065505.1	hypothetical protein
YP_004063025.1	DNA packaging protein Gp2	YP_003065532.1	hypothetical protein
YP_004063027.1	hypothetical protein CKC_03950	YP_003065537.1	hypothetical protein
YP_004063031.1	hypothetical protein CKC_03970	YP_003065538.1	hypothetical protein
YP_004063032.1	hypothetical protein CKC_03975	YP_003065539.1	hypothetical protein
YP_004063039.1	hypothetical protein CKC_04010	YP_003065540.1	hypothetical protein
YP_004063040.1	hypothetical protein CKC_04015	YP_003065545.1	hypothetical protein
YP_004063043.1	hypothetical protein CKC_04030	YP_003065553.1	hypothetical protein
YP_004063044.1	hypothetical protein CKC_04035	YP_003065555.1	hypothetical protein
YP_004063045.1	hypothetical protein CKC_04040	YP_003065556.1	hypothetical protein
YP_004063048.1	Integrase [Candidatus	YP_003065563.1	hypothetical protein
YP_004063051.1	hypothetical protein CKC_04070	YP_003065564.1	hypothetical protein
YP_004063053.1	hypothetical protein CKC_04080	YP_003065566.1	hypothetical protein
YP_004063064.1	hypothetical protein CKC_04135	YP_003065567.1	hypothetical protein
YP_004063065.1	anthranilate synthase	YP_003065568.1	hypothetical protein
YP_004063066.1	hypothetical protein CKC_04145	YP_003065569.1	hypothetical protein
YP_004063080.1	hypothetical protein CKC_04215	YP_003065570.1	hypothetical protein
YP_004063081.1	hypothetical protein CKC_04220	YP_003065572.1	hypothetical protein
YP_004063082.1	hypothetical protein CKC_04225	YP_003065576.1	hypothetical protein
YP_004063083.1	hypothetical protein CKC_04230	YP_003065577.1	hypothetical protein
YP_004063085.1	hypothetical protein CKC_04240	YP_003065581.1	hypothetical protein
YP_004063086.1		YP_003065593.1	hypothetical protein
YP_004063087.1	dihydroneopterin aldolase	YP_003065594.1	hypothetical protein
YP_004063088.1	dihydropteroate synthase	YP_003065596.1	hypothetical protein
YP_004063092.1	Mg chelatase-related protein	YP_003065597.1	hypothetical protein
YP_004063095.1	hypothetical protein CKC_04290	YP_003065598.1	hypothetical protein
YP_004063122.1	hypothetical protein CKC_04425	YP_003065599.1	hypothetical protein
YP_004063124.1	hypothetical protein CKC_04435	YP_003065602.1	hypothetical protein
YP_004063127.1	hypothetical protein CKC_04450	YP_003065611.1	guanylate kinase
YP_004063128.1	hypothetical protein CKC_04455	YP_003065616.1	hypothetical protein
YP_004063130.1	hypothetical protein CKC_04465	YP_003065620.1	hypothetical protein
YP_004063136.1	hypothetical protein CKC_04495	YP_003065627.1	hypothetical protein
YP_004063137.1	hypothetical protein CKC_04500	YP_003065629.1	hypothetical protein
YP_004063149.1	hypothetical protein CKC_04560	YP_003065633.1	hypothetical protein
YP_004063150.1	hypothetical protein CKC_04565	YP_003065635.1	hypothetical protein
YP_004063151.1	hypothetical protein CKC_04570	YP_003065639.1	hypothetical protein
YP_004063152.1	hypothetical protein CKC_04575	YP_003065640.1	hypothetical protein
YP_004063153.1	hypothetical protein CKC_04580	YP_003065641.1	hypothetical protein
YP_004063168.1	hypothetical protein CKC_04655
YP_004063172.1	DNA repair protein RadC
YP_004063178.1	hypothetical protein CKC_04705
YP_004063197.1	lipoprotein releasing system,
YP_004063209.1	hypothetical protein CKC_04860
YP_004063220.1	hypothetical protein CKC_04915
YP_004063243.1	hypothetical protein CKC_05030
YP_004063257.1	hypothetical protein CKC_05115
YP_004063258.1	hypothetical protein CKC_05120
YP_004063260.1	hypothetical protein CKC_05130
YP_004063262.1	hypothetical protein CKC_05140
YP_004063263.1	hypothetical protein CKC_05145
YP_004063264.1	hypothetical protein CKC_05150
YP_004063274.1	DNA polymerase III subunit
YP_004063276.1	hypothetical protein CKC_05210
YP_004063277.1	hypothetical protein CKC_05215
YP_004063281.1	hypothetical protein CKC_05235
YP_004063320.1	hypothetical protein CKC_05430
YP_004063339.1	hypothetical protein CKC_05530
YP_004063348.1	hypothetical protein CKC_05575
YP_004063371.1	hypothetical protein CKC_05690
YP_004063372.1	3-methyladenine DNA
YP_004063373.1	hypothetical protein CKC_05700
YP_004063374.1	hypothetical protein CKC_05705
YP_004063376.1	hypothetical protein CKC_05715
YP_004063378.1	hypothetical protein CKC_05725
YP_004063380.1	hypothetical protein CKC_05735
YP_004063383.1	hypothetical protein CKC_05750
YP_004063390.1	hypothetical protein CKC_05785
YP_004063393.1	hypothetical protein CKC_05800
YP_004063394.1	hypothetical protein CKC_05805
YP_004063395.1	hypothetical protein CKC_05810
YP_004063396.1	hypothetical protein CKC_05815
YP_004063398.1	hypothetical protein CKC_05825
YP_004063400.1	hypothetical protein CKC_05835
YP_004063403.1	hypothetical protein CKC_05850
YP_004063404.1	hypothetical protein CKC_05855
YP_004063405.1	hypothetical protein CKC_05860
YP_004063406.1	hypothetical protein CKC_05865
YP_004063407.1	hypothetical protein CKC_05870
YP_004063408.1	hypothetical protein CKC_05875
YP_004063410.1	hypothetical protein CKC_05885
YP_004063414.1	hypothetical protein CKC_05905
YP_004063415.1	hypothetical protein CKC_05910
YP_004063416.1	hypothetical protein CKC_05915
YP_004063417.1	hypothetical protein CKC_05920
YP_004063419.1	hypothetical protein CKC_05930
YP_004063421.1	hypothetical protein CKC_05940
YP_004063429.1	hypothetical protein CKC_05980
YP_004063430.1	hypothetical protein CKC_05985
